# Supplementary material for: Refugee maternal and perinatal health in Ontario, Canada: a retrospective population-based study
Source: PubMed Central journal article supplement — BMJ Open. 2018 Apr 10;8(4):e018979. doi: 10.1136/bmjopen-2017-018979 (PMC5898303; doi:10.1136/bmjopen-2017-018979), 2018-04-10
Supplement: bmjopen-2017-018979.draft_revisions.pdf [file bmjopen-2017-018979.draft_revisions.pdf]

# BMJ Open

BMJ Open is committed to open peer review. As part of this commitment we make the peer review history of every article we publish publicly available.

When an article is published we post the peer reviewers' comments and the authors' responses online. We also post the versions of the paper that were used during peer review. These are the versions that the peer review comments apply to.

The versions of the paper that follow are the versions that were submitted during the peer review process. They are not the versions of record or the final published versions. They should not be cited or distributed as the published version of this manuscript.

BMJ Open is an open access journal and the full, final, typeset and author-corrected version of record of the manuscript is available on our site with no access controls, subscription charges or pay-per-view fees (<http://bmjopen.bmj.com>).

If you have any questions on BMJ Open's open peer review process please email [info.bmjopen@bmj.com](mailto:info.bmjopen@bmj.com)

# BMJ Open

## Refugee maternal and perinatal health in Ontario Canada: a retrospective population-based study

|                                 |                                                                                                                                                                                                                                                                                                                                                                                                                                                                                                                                                                                                                                                                                                                                                                                                                                                   |
|---------------------------------|---------------------------------------------------------------------------------------------------------------------------------------------------------------------------------------------------------------------------------------------------------------------------------------------------------------------------------------------------------------------------------------------------------------------------------------------------------------------------------------------------------------------------------------------------------------------------------------------------------------------------------------------------------------------------------------------------------------------------------------------------------------------------------------------------------------------------------------------------|
| Journal:                        | <i>BMJ Open</i>                                                                                                                                                                                                                                                                                                                                                                                                                                                                                                                                                                                                                                                                                                                                                                                                                                   |
| Manuscript ID                   | bmjopen-2017-018979                                                                                                                                                                                                                                                                                                                                                                                                                                                                                                                                                                                                                                                                                                                                                                                                                               |
| Article Type:                   | Research                                                                                                                                                                                                                                                                                                                                                                                                                                                                                                                                                                                                                                                                                                                                                                                                                                          |
| Date Submitted by the Author:   | 03-Aug-2017                                                                                                                                                                                                                                                                                                                                                                                                                                                                                                                                                                                                                                                                                                                                                                                                                                       |
| Complete List of Authors:       | Wanigaratne, Susitha; St. Michael's Hospital, Centre for Urban Health Solutions; Institute for Clinical Evaluative Sciences<br>Shakya, Yogendra; 4. Access Alliance Multicultural Health and Community Services; University of Toronto, Dalla Lana School of Public Health<br>Gagnon, Anita; McGill University<br>Cole, Donald; University of Toronto, Dalla Lana School of Public Health<br>Rashid, Meb; Women's College Hospital<br>Blake, Jennifer; Society of Obstetricians and Gynaecologists of Canada<br>Dastoori, Parisa; St. Michael's Hospital<br>Moineddin, Rahim; University of Toronto, Family and Community Medicine<br>Ray, Joel; St. Michael's Hospital, Keenan Research Centre; University of Toronto, Departments of Medicine and Obstetrics and Gynaecology<br>Urquia, Marcelo; University of Manitoba; St. Michael's Hospital |
| <b>Primary Subject Heading</b>: | Public health                                                                                                                                                                                                                                                                                                                                                                                                                                                                                                                                                                                                                                                                                                                                                                                                                                     |
| Secondary Subject Heading:      | Epidemiology, Obstetrics and gynaecology                                                                                                                                                                                                                                                                                                                                                                                                                                                                                                                                                                                                                                                                                                                                                                                                          |
| Keywords:                       | EPIDEMIOLOGY, Maternal medicine < OBSTETRICS, PERINATOLOGY, PUBLIC HEALTH, SOCIAL MEDICINE                                                                                                                                                                                                                                                                                                                                                                                                                                                                                                                                                                                                                                                                                                                                                        |
|                                 |                                                                                                                                                                                                                                                                                                                                                                                                                                                                                                                                                                                                                                                                                                                                                                                                                                                   |

SCHOLARONE™  
Manuscripts

## Refugee maternal and perinatal health in Ontario Canada: a retrospective population-based study

Susitha Wanigaratne<sup>1,2</sup>, Yogendra Shakya<sup>3,4</sup>, Anita Gagnon<sup>5</sup>, Donald C. Cole<sup>4</sup>, Meb Rashid<sup>6</sup>, Jennifer Blake<sup>7</sup>, Parisa Dastoori<sup>1,3</sup>, Rahim Moineddin<sup>8</sup>, Joel G. Ray<sup>2,9,10</sup>, Marcelo L. Urquia<sup>1,2,4,11</sup>

<sup>1</sup> Centre for Urban Health Solutions, St. Michael's Hospital, 30 Bond Street, Toronto, Ontario, M5W 1W8, Canada. Ph: 416-864-6060 x77382. Email: wanigaratnes@smh.ca

<sup>2</sup> Institute for Clinical Evaluative Sciences, Sunnybrook Health Sciences Centre, Toronto, Ontario, Canada,

<sup>3</sup> Access Alliance Multicultural Health and Community Services, Toronto, Ontario, Canada,

<sup>4</sup> Dalla Lana School of Public Health, University of Toronto, Toronto, Ontario, Canada,

<sup>5</sup> Ingram School of Nursing, McGill University, Montreal, Quebec, Canada

<sup>6</sup> Crossroads Medical Clinic, Women's College Hospital, Toronto, Ontario, Canada,

<sup>7</sup> Society of Obstetricians and Gynaecologists of Canada, Ottawa, Ontario, Canada

<sup>8</sup> Department of Family and Community Medicine, University of Toronto, Toronto, Ontario, Canada,

<sup>9</sup> Keenan Research Centre, St. Michael's Hospital, Toronto, Ontario, Canada,

<sup>10</sup> Departments of Medicine and Obstetrics and Gynaecology, University of Toronto, Toronto, Ontario, Canada,

<sup>11</sup> Manitoba Centre for Health Policy, University of Manitoba, Winnipeg, Manitoba, Canada

## Abstract

Objectives: Immigrants are thought to be healthier than their native-born counterparts, but less is known about the health of refugees or forced migrants. Previous studies often equate refugee status with immigration status or country of birth (COB) and none have matched refugees to non-refugee immigrants on COB. Herein, we examined whether: i) refugee status, irrespective of immigration status and COB, is a risk indicator for adverse maternal and perinatal health outcomes, and ii) refugee and non-refugee immigrants differ from Canadian-born mothers for maternal and perinatal outcomes.

Design: This is a retrospective population-based database study. We implemented two designs: i) 1:1 matching of refugees to non-refugee immigrants on COB and ii) an unmatched design using all data.

Setting and participants: Refugee immigrants (N=52,360), non-refugee immigrants (N=360,007) and Canadian-born mothers (N=977,045) eligible for universal health care insurance who had a hospital birth in Ontario, Canada between 2002 and 2014.

Primary outcomes: Numerous adverse maternal and perinatal health outcomes.

Results: Refugees did not differ from non-refugee immigrants for most adverse maternal and perinatal outcomes, except for HIV, with respective rates of 0.36% and 0.17% and an ARR of 1.67 (95% CI 1.17-2.37). Other elevated outcomes included gestational diabetes mellitus (ARR 1.10, 95% CI 1.04-1.17), moderate preterm birth (ARR 1.10, 95% CI 1.03-1.19) and very preterm birth (ARR 1.18, 95% CI 0.99-1.42). Separately comparing refugee and non-refugee immigrants to Canadian-born mothers, the ARRs for each immigrant group were generally in the same direction and of a similar magnitude, with refugee and non-refugee immigrant mothers faring worse for one third of outcomes.

Conclusions: Refugee status was not strongly associated with adverse maternal and perinatal health outcomes. The definition of refugee status used herein may not sensitively identify refugees at highest risk. Future research would benefit from further refining refugee status based on migration experiences.

### Strengths and limitations of this study

- This is a retrospective population-based cohort study from Ontario, Canada linking official permanent resident immigration, hospital and physician billing data to compare deliveries between 2002 and 2014 from refugee mothers (N=52,360) to both non-refugee immigrant mothers (N=360,007) and Canadian-born mothers (N=977,045).
- This is the first study to match refugee immigrant to non-refugee immigrant mothers on country of birth, making it possible to explicitly determine whether excess risk among refugees is independent of a woman's country of birth.
- This is the largest study of refugee maternal and perinatal health in the literature.
- The administrative definition of refugee status used in this study may not be sensitive enough to identify refugees with greater health risks or greater health care needs.

## Introduction

Refugees are considered an extremely vulnerable group for adverse health outcomes.[1] Canada, and other signatories to the United Nations (UN) Convention Relating to the Status of Refugees, define refugees as persons who fear persecution or violence because of their race, religion, nationality or political views and are forced to flee their home countries.[2] In Canada 10% of the 250,000 immigrants who become permanent residents each year are admitted as refugees.[3] Most non-refugee permanent residents are skilled workers or their family members. Skilled immigrants are selected based on high levels of education, official language fluency, and work experience. Family class immigrants must be related to a permanent resident or Canadian citizen able to provide financial support. This is in contrast to refugees who are either chosen based on vulnerability by the UN High Commissioner for Refugees (UNHCR) or, claim refugee status upon arrival and have the claim accepted by an independent tribunal.[4] Given differing exposures in: countries of origin (e.g., conflict), transition countries (e.g., poor access to health services), post-migration exposures (e.g., discrimination); and receiving country immigration policies, the maternal and perinatal health of refugees may differ from their non-refugee immigrant counterparts.[5,6]

To advance knowledge of the relationship between refugee status and health, we used population-based administrative health care and immigration data from Ontario, the province which receives about half of all refugees arriving to Canada [3]. First, we aimed to determine whether refugee immigrants experience greater risk of adverse maternal and perinatal health outcomes above and beyond that experienced by non-refugee immigrants from the same country of birth. Few refugee maternal and perinatal health studies in Canada [5–8] or in other countries [9] compare refugees to non-refugee immigrants. Many studies use a native-born comparator and attribute excess risk to refugee status even though a non-refugee immigrant comparator is absent [10–15]. In addition, many studies rely on country of birth as an indicator of refugee migration [11–18] rather than identifying refugees based on their legal status or migration history. These details are critical, since specialized maternal and perinatal health care tailored to refugees cannot be effectively justified if a “refugee effect” cannot be differentiated from an “immigrant effect” or “country effect”. Second, we compared maternal and perinatal health outcomes among refugee and non-refugee immigrant mothers to Canadian-born mothers. Research often finds that immigrants are healthier than the native-born population, the so-called “healthy migrant effect”[19]. However, this may not apply to refugees given their differential exposure to health risks prior to arrival (as described above). Results from refugee maternal and perinatal health studies are mixed.[5,6,12] Secondary analyses focused on the top 5 refugee source countries (Sri Lanka, Somalia, Afghanistan, Iran, and China).

## Methods

### *Study Design and Inclusion/Exclusion Criteria*

This retrospective population-based database study included all Ontario hospital childbirth admissions occurring between April 1, 2002 and March 31, 2014. A matched cohort design was used to isolate the excess risk conferred by refugee status beyond that of immigration and country of birth, while a non-matched cohort design used all available data to compare outcomes of refugee and non-refugee immigrants to Canadian-born mothers. Deliveries to refugee and non-refugee immigrant mothers were identified retrospectively through linkage of hospital admissions to the Immigration and Refugees Citizenship Canada Permanent Resident Database (IRCC-PRD). The cost of health care services was not a barrier to accessing care since all mothers were eligible for universal, publicly funded health care insurance. Deliveries not linked to the IRCC PRD were attributed to *Canadian-born mothers*. We reduced the bias attributed to unlinked migrant mothers among Canadian-born mothers by further restricting to mothers who: i) became eligible for provincial health care insurance on or before 1990 (the

1  
2  
3 first year insurance eligibility was recorded – those eligible prior to 1990 were given an eligibility start  
4 year of 1990) and less likely to be immigrants; ii) were born in an Ontario hospital after 1991 (the first  
5 year births were available in hospital data) or; iii) became eligible for provincial health care insurance  
6 within 1 year of their year of birth and therefore lived in Ontario from a very young age.

7  
8 For maternal outcomes, the unit of analysis was the delivery episode, where multiple births were  
9 counted as a single delivery. For all perinatal outcomes, the unit of analysis was restricted to singletons.  
10 Since the outcomes are commonly used in epidemiologic surveillance, Canadian Perinatal Surveillance  
11 System [20] definitions were used where possible. Analysis of preterm birth (PTB) was restricted to live  
12 births between 22-41 weeks gestational age (GA) and a birth weight (BWT) of  $\geq 500$  grams (g); neonatal  
13 intensive care (NICU) admission - live births with GA  $\geq 20$  weeks or a BWT  $\geq 500$  g; neonatal mortality -  
14 live births with a BWT  $\geq 500$  g; any congenital anomaly - stillbirths and live births with a GA  $\geq 20$  weeks or  
15 a BWT  $\geq 500$  g; stillbirth - GA  $\geq 20$  weeks or a BWT  $\geq 500$  g; perinatal mortality - stillbirths and live births  
16 with a GA  $\geq 20$  weeks or a BWT  $\geq 500$  g.  
17

### 18 19 *Data Sources*

20 We linked five administrative databases held at the Institute for Clinical and Evaluative Sciences  
21 (ICES) in Toronto, Ontario. These datasets were linked using unique encoded identifiers and analyzed at  
22 ICES.

23 The IRCC-PRD is administered by the Canadian government. The Ontario portion of this dataset  
24 contains information on all international migrants successful in obtaining permanent residency between  
25 1985 and 2012. The IRCC-PRD contained  $<1\%$  of missing values for all variables. Eighty-six percent of  
26 IRCC-PRD individuals (91.6% of all refugees) were linked to Ontario's health care registry, consisting of  
27 all persons eligible for publicly funded health care insurance in the province of Ontario between April 1,  
28 1990 and March 31, 2014. Little bias in the linkage was detected.[21] The health care registry also  
29 contains date of health care eligibility, neighborhood income quintile and date of death.

30  
31 Childbirth records were obtained from the Discharge Abstract Database originating from the  
32 Canadian Institute of Health Information. Diagnosis and procedure codes using the 10th revision of the  
33 *International Statistical Classification of Diseases and Related Health Problems*, Canadian enhancement,  
34 and *Canadian Classification of Health Interventions* (ICD-10-CA/CCI) identified women with all maternal  
35 or perinatal outcomes except early neonatal and neonatal mortality. A validation study supported the  
36 use of this database for perinatal research.[22] This dataset also contains information on maternal age  
37 at the time of delivery, self-reported parity and birth plurality.

38  
39 The Office of the Registrar General's Vital Statistics-Death registry was used to identify early  
40 neonatal mortality (0-7 days of life) and neonatal mortality (0-28 days of life) between 2002 and 2012.  
41 96.2% of records in the Vital Statistics Registry were successfully linked to the health care registry and  
42 little bias in the linkage was detected.[21] However, individuals between the ages of 0 and 14 years  
43 were more likely to be unlinked. Vital Statistics data were supplemented by mortality recorded in the  
44 health care registry and other administrative health care databases, however early neonatal deaths may  
45 also be missing in the health care registry because health care numbers may not have been issued.[21]

46  
47 The Ontario HIV Database (1992-2014) uses an algorithm consisting of at least three physician HIV  
48 diagnoses in a 3-year period to identify HIV positive persons. The algorithm demonstrated 96.2%  
49 sensitivity and 99.6% specificity when compared to patient charts.[23] HIV diagnoses were restricted to  
50 women diagnosed prior to child birth.  
51

### 52 53 *Variables*

54 Refugee status was defined using the IRCC-PRD. Refugees included government assisted refugees,  
55 privately sponsored refugees, successful refugee claimants and refugee dependents (i.e., family  
56 members listed on the primary applicant's permanent residency application for refugee status). Non-  
57

1  
2  
3  
4  
5  
6  
7  
8  
9  
10  
11  
12  
13  
14  
15  
16  
17  
18  
19  
20  
21  
22  
23  
24  
25  
26  
27  
28  
29  
30  
31  
32  
33  
34  
35  
36  
37  
38  
39  
40  
41  
42  
43  
44  
45  
46  
47  
48  
49  
50  
51  
52  
53  
54  
55  
56  
57  
58  
59  
60

refugee immigrants included economic and family class immigrants. Canadian-born women are described above (under “Study Design and Inclusion/Exclusion Criteria”).

We examined several maternal and perinatal health outcomes (see Supplementary Table S1 for codes). Severe maternal morbidity (SMM), was evaluated using a composite surveillance indicator [24,25] developed by the Canadian Perinatal Health Surveillance System. A woman had SMM if she had one or more of forty-five ICD-10-CA/CCI diagnoses or procedures reported during hospital admission for labour or delivery.[24] Other maternal health outcomes, documented at the time of delivery, were: complicated urinary tract infection (UTI), pre-existing hypertension, gestational hypertension, preeclampsia, eclampsia, pre-pregnancy diabetes, gestational diabetes mellitus (GDM), caesarean section, post-partum hemorrhage (PPH) and maternal intensive care unit (ICU) admission. Perinatal outcomes, documented at birth, included: any congenital anomaly, moderate preterm birth (MPTB) (32-36 weeks gestation), very preterm birth (VPTB) (< 32 weeks gestation), neonatal ICU (NICU) admission and stillbirth. Measurement of early neonatal mortality (0-7 days of life) and neonatal mortality (0-28 days of life) were not restricted to the hospital delivery admission. Information from both the ORGD and the RPDB were combined to identify early neonatal and neonatal mortality. Early neonatal mortality was combined with information on stillbirth to identify perinatal mortality.

Potential confounders were identified *a priori*. Some control variables were available for all deliveries, including maternal age at delivery (15-19, 20-24, 25-29, 30-34, 35-39, 40+ years), neighborhood income quintile, parity (0, 1, 2 or ≥ 3 previous births) and plurality. Other control variables were only available for refugees and non-refugee immigrants since this information was collected in the IRCC-PRD. These included: maternal country of birth (COB), COBs categorized into world sub-regions according to the UN classification system with a modification to the developed countries classification [26]; maternal education at arrival (0-9 years, 10-12 years, 13+ years, trade certificate/non-university diploma, University degree); knowledge of official Canadian languages at arrival (English and/or French or neither); and duration of residence in Canada, defined as the time (in years) elapsed between the date of becoming a permanent resident and the date of delivery.

### Analysis

Multivariable log-binomial regression was used for all analyses. Deliveries with missing data for any control variable were excluded. To estimate an independent association with refugee status, we considered the potential heterogeneity in countries represented among refugees and non-refugees and the potential for this to bias the frequency of the outcome by 1:1 matching of first deliveries in Canada among refugees to non-refugee immigrants. Analyses were restricted to the first delivery in the hospitalization database to prevent matching several deliveries from a single refugee mother to deliveries to more than one non-refugee immigrant mother. Generalized estimating equations (GEE) with an exchangeable correlation matrix were used to take into account paired cohort data.[27] Models were adjusted for maternal age at delivery, parity, neighborhood income, education at arrival, knowledge of official languages at arrival and duration of residence in Canada. In secondary analyses focusing on refugee and non-refugee immigrants from the top 5 refugee source countries of birth, all deliveries were included and non-independence of the outcome among deliveries to the same mother was accounted for with GEE.

To compare refugee and non-refugee mothers to Canadian-born mothers all deliveries were included and GEE was used to account for non-independence of the outcome among deliveries from the same mother. Fewer variables were available for Canadian-born women so models could only be adjusted for maternal age at delivery, parity and neighborhood income.

### Research Ethics

This study was approved by the institutional review board at Sunnybrook Health Sciences

Centre, and the ethics review board of St. Michael's Hospital, Toronto, Canada.

## Results

Table 1 summarizes the characteristics of deliveries to refugee immigrant (N=52,360), non-refugee immigrant (N=360,007) and Canadian-born mothers (N=977,045). More refugee mothers (13.9%) had high parity ( $\geq 3$  previous births) compared to both non-refugee immigrant (5.8%) and Canadian-born mothers (5.5%). A greater proportion of refugees had less than 13 years of education at arrival (74.5%) compared to non-refugee immigrants (45.4%). South Asia and Sub-Saharan Africa contributed the most refugees (27.4% and 24.0%, respectively).

For most outcomes, differences between refugees and non-refugees matched on COB were non-significant (see Figures 1 and 2). GDM (ARR=1.10 95% CI 1.04-1.17), HIV (ARR=1.67 95% CI 1.17-2.37) and MPTB (ARR=1.10 95% CI 1.03-1.19) were significantly higher among refugees. VPTB approached statistical significance (ARR=1.18, 95% CI 0.99-1.42).

Supplementary Figures (S1a/b through S5a/5b) disaggregate results according to the top 5 refugee source countries to Ontario— Sri Lanka, Somalia, Afghanistan, Iraq and China. Afghan and Iraqi refugees had higher risk of caesarean section while Sri Lankan and Somali refugees experienced higher risk of MPTB compared to their same-country non-refugee counterparts.

Figures 3 and 4 compare both refugees to Canadian-born mothers and non-refugee immigrants to Canadian-born mothers. Other than severe maternal morbidity (SMM) and HIV, the two sets of ARR's comparing refugees to Canadian-born mothers and non-refugees to Canadian-born mothers were in the same direction and of a similar magnitude. With respect to SMM (Figure 3), refugees had a significantly higher rate compared to Canadian-born mothers while non-refugee immigrant mothers had a significantly lower rate. However, after HIV was removed from the SMM index refugees experienced a similar rate of SMM to Canadian-born mothers. For other maternal outcomes (Figure 3), both refugees and non-refugees compared to Canadian-born mothers had: *significantly lower risk* of complicated UTI, pre-existing hypertension, gestational hypertension, preeclampsia, eclampsia, pre-pregnancy diabetes, and PPH; and *significantly higher risk* of caesarean section, GDM, maternal ICU admission and HIV. In terms of perinatal outcomes (Figure 4), both refugees and non-refugees compared to Canadian-born mothers had: *significantly lower risk* of any congenital anomaly and MPTB; similar risk of VPTB and neonatal mortality; and *significantly higher risk* of NICU admission, perinatal mortality and stillbirth.

## Discussion

We found modest increased risks of GDM, MPTB and VPTB among refugee compared to non-refugee mothers from the same COB. HIV was the exception with a much greater prevalence. Overall, our findings suggest that refugee status, measured with an administrative definition, is not a strong risk indicator for poor maternal and perinatal health. In addition, we found that refugee and non-refugee mothers experienced the same direction and a similar magnitude of relative risk for almost all outcomes when each group was separately compared to Canadian-born mothers. About one third of outcomes were significantly worse among refugee and non-refugee immigrant mothers when compared to Canadian-born mothers.

The findings on SMM and HIV are explained in detail in a previous report of ours [5] (although unmatched on COB). Our current results are consistent with the previous study however with smaller HIV prevalence ratios. The smaller prevalence ratio can likely be explained by the different method used to capture HIV diagnoses (hospital discharge data in the previous study and HIV physician diagnoses data in the current study) but also because 1:1 matching of refugee to non-refugee immigrants on COB in the current study accounted for some of the difference between refugee and non-refugee immigrants. In our previous work we found that refugee mothers with HIV did not have any greater maternal morbidity compared to non-refugee immigrant or Canadian-born mothers with HIV, suggesting



1  
2  
3 that HIV during pregnancy is well-managed in Ontario regardless of refugee status (with permanent  
4 residency). In contrast, a Dutch study [9] describes HIV as a risk indicator for severe acute maternal  
5 morbidity among asylum-seekers (refugees without permanent residency); suggesting that a lack of  
6 appropriate HIV care may be contributing to SAMM.  
7

8 Afghan and Iraqi refugee mothers were ~20% more likely to experience caesarean section than  
9 their non-refugee counterparts. A study involving 10 Canadian hospitals [28] found a significant  
10 difference between refugee, asylum-seeker and non-refugee immigrants from South-East and Central  
11 Asia (56.7%, 28.6%, 26.0%, respectively). Reasons for the higher caesarean rate among refugees were:  
12 higher parity, medical complications, low socio-economic status, socio-cultural factors and sub-optimal  
13 perinatal care.[28]

14 Refugee status was also positively associated with GDM, MPTB and VPTB. Sri Lankan and Somali  
15 refugees had a greater risk of MPTB. The relationship between refugee status and GDM may be  
16 explained by a study which found stressful events were associated with 2.5 times greater risk of  
17 GDM.[29] Other research suggests maternal chronic stress is an important risk factor for PTB,[30]  
18 particularly among socially disadvantaged populations.[31] Previously published research of ours found  
19 that the effect of refugee status on PTB was stronger among refugee mothers who resided in a  
20 transition country prior to arriving in Canada [7] with potentially greater exposure to psychosocial stress.  
21 The hypothesized physiological mechanism connecting psychosocial stress to both GDM and PTB  
22 involves dysfunction of regulatory hormones in the body - insulin resistance or impaired insulin  
23 metabolism leading to GDM [29] and early release of hormones required for the initiation of labour  
24 leading to PTB.[30]  
25

26 The extent to which refugee and non-refugee immigrants experienced the “healthy migrant  
27 effect” (HME) (relative to Canadian-born mothers) for all maternal and perinatal health outcomes was  
28 identical. We found that both refugee and non-refugee immigrants experienced higher risk of the same  
29 adverse maternal and perinatal health outcomes (1/3 of all outcomes examined) compared to Canadian-  
30 born mothers. This suggests that refugee status, using an administrative definition of refugees, is not an  
31 important factor in the HME for these outcomes. These findings are also consistent with others who  
32 have stated that the HME is not evident for all health outcomes.[32]  
33  
34

### 35 *Strengths and Limitations*

36 Among studies examining refugee maternal and perinatal health [5–18,33–44], our study has  
37 several unique and important strengths. Firstly, our study used official government immigration data to  
38 identify women who met the UNHCR definition of a refugee rather than relying on COB as an indicator  
39 of refugee status, as many previous studies have done.[11–18] Secondly, we matched refugee and non-  
40 refugee immigrant women on COB (see Supplementary Figures S6 & S7 for unmatched results). By  
41 matching on COB, ours is the first study to effectively address the question of whether refugee status,  
42 independent of COB, is a risk indicator for adverse maternal and perinatal outcomes. Thirdly, to our  
43 knowledge our study includes the largest sample of mothers legally classified as refugees reported in the  
44 literature contributing to adequate statistical power for our main analyses (objectives 1 and 2).  
45

46 This study is not without limitations. Firstly, the “refugee experience” as it pertains to health  
47 risks may not be consistent with the legally applied definition of “refugee”. Risk factors for adverse  
48 outcomes (i.e., exposure to violence, forced family separation) are context dependent, such as the  
49 length of time in the migration phase and access to health and other supportive services before and  
50 during migration - factors for which we did not have data. We addressed context by matching refugees  
51 to non-refugees on COB as well as restricting analyses to the top 5 refugee-source countries; however  
52 even within these COBs there is likely important heterogeneity which we could not examine.  
53 Sponsorship status (government assisted and privately sponsored refugees vs. successful refugee  
54 claimants) was examined in secondary analyses but other than gestational diabetes, no significant  
55  
56  
57

1  
2  
3 effects were found. A second limitation is the inability to categorize family class non-refugee immigrants  
4 according to the permanent residency status of the sponsoring family member (i.e., economic or  
5 refugee). This may have caused some refugees to be misclassified as non-refugee immigrants and  
6 contributed to biasing estimates in Figures 1 and 2 towards the null. However, given that refugees make  
7 up ~10% of all permanent residents to Canada and are less likely to have the financial means necessary  
8 for sponsorship, the number of family class members who may be refugees is not likely to substantially  
9 affect risk estimates. A third limitation may be that estimates in Figures 1 and 2 were over-adjusted  
10 given that the majority of non-refugee permanent residents are selected based on their education and  
11 official language ability. However, unadjusted estimates (see Supplementary Table S2) demonstrate that  
12 adjusting for these variables does not affect our conclusions. Finally, our findings are not generalizable  
13 to *unsuccessful* refugee claimants being that our study is limited to permanent residents, including  
14 *successful* refugee claimants, who have access to universal comprehensive health care.  
15  
16

### 17 *Implications*

18 To help understand modest differences in GDM, MPTB and VPTB between refugee and non-  
19 refugee immigrant women, further research into stressors refugee mothers experience in their  
20 countries of origin, in transition countries and in countries of re-settlement may help support  
21 development of preconception and pregnancy stress prevention and management strategies.  
22

23 Overall, based on an administrative definition of refugee, we do not find a strong need to  
24 enhance health care for refugee mothers and their infants in Canada. There are a few important caveats  
25 to this interpretation. Firstly, and perhaps most importantly, the administrative definition of refugees is  
26 broad and is perhaps unable to sensitively identify refugees at highest health risk. Secondly, non-refugee  
27 immigrants from refugee-source countries may be just as likely to experience pre-departure health risks  
28 as their refugee counterparts, reducing specificity and minimizing any differences between the groups.  
29 Thirdly, community resources targeting the unique health and resettlement needs of refugees [45,46] as  
30 well as efforts focusing on equity and migrant friendly maternity care [47] may be helping to minimize  
31 disparities. Lastly, despite official immigration admission policies [5,48] which appear to select for  
32 vulnerable refugees, it may be possible that unofficial processes may favour selection of healthy  
33 refugees, similar to official processes that select for non-refugee immigrants.  
34  
35

### 36 *Future Research*

37 Refugees should be compared to non-refugee immigrants, preferably from the same country of  
38 birth, as this more effectively addresses the question of whether refugees, among all migrants, are at  
39 increased risk for poor health. Further refining refugee status based on detailed migration experiences  
40 would also be beneficial. Finally, to help facilitate international comparisons, refugee health researchers  
41 may find it useful to state if and how immigration policies shape the health of refugees relative to other  
42 immigrants within their borders.  
43  
44  
45  
46  
47  
48  
49  
50  
51  
52  
53  
54  
55  
56  
57

## References

- 1 Gagnon AJ, Merry L, Robinson C. A systematic review of refugee women's reproductive health. *Refuge* 2002.
- 2 Citizenship and Immigration Canada. Guide 6000 - Convention Refugees Abroad and Humanitarian-Protected Persons Abroad. 2017. <http://www.cic.gc.ca/English/information/applications/guides/E16000TOC.asp> (accessed 1 May 2017).
- 3 Immigration, Refugees & Citizenship Canada. Facts & Figures 2015: Immigration Overview - Permanent Residents – Annual IRCC Updates. Canada - Permanent residents by province or territory and category. 2015. [http://www.cic.gc.ca/opendata-donneesouvertes/data/IRCC\\_FFPR\\_17\\_F.xls](http://www.cic.gc.ca/opendata-donneesouvertes/data/IRCC_FFPR_17_F.xls) (accessed 11 May 2017).
- 4 Settlement.org. How does Canada's refugee system work? 2017. <http://settlement.org/ontario/immigration-citizenship/refugees/basic-information-for-refugees/how-does-canada-s-refugee-system-work/> (accessed 1 May 2017).
- 5 Wanigaratne S, Cole DC, Bassil K, *et al.* Contribution of HIV to Maternal Morbidity Among Refugee Women in Canada. *Am J Public Health* 2015;**105**:2449–56. doi:10.2105/AJPH.2015.302886
- 6 Wanigaratne S, Cole DC, Bassil K, *et al.* Severe Neonatal Morbidity Among Births to Refugee Women. *Matern Child Health J* 2016;**20**:2189–98. doi:10.1007/s10995-016-2047-4
- 7 Wanigaratne S, Cole DC, Bassil K, *et al.* The influence of refugee status and secondary migration on preterm birth. *J Epidemiol Community Health* 2016;**70**:622–8. doi:10.1136/jech-2015-206529
- 8 Vigod SN, Bagadia AJ, Hussain-Shamsy N, *et al.* Postpartum mental health of immigrant mothers by region of origin, time since immigration, and refugee status: a population-based study. *Arch Womens Ment Health* Published Online First: 4 April 2017. doi:10.1007/s00737-017-0721-1
- 9 Van Hanegem N, Miltenburg AS, Zwart JJ, *et al.* Severe acute maternal morbidity in asylum seekers: a two-year nationwide cohort study in the Netherlands. *Acta Obstet Gynecol Scand* 2011;**90**:1010–6.
- 10 Gagnon AJ, Dougherty G, Wahoush O, *et al.* International migration to Canada: The post-birth health of mothers and infants by immigration class. *Soc Sci Med* 2012;**76**:197–207.
- 11 Vangen S, Stoltenberg C, Johansen REB, *et al.* Perinatal complications among ethnic Somalis in Norway. *Acta Obstet Gynecol Scand* 2002;**81**:317–22.
- 12 Essen B, Hanson BS, Ostergren PO, *et al.* Increased perinatal mortality among sub-Saharan immigrants in a city-population in Sweden. *Acta Obstet Gynecol Scand* 2000;**79**:737–43.
- 13 Belihu FB, Davey M-A, Small R. Perinatal health outcomes of East African immigrant populations in Victoria, Australia: a population based study. *BMC Pregnancy Childbirth* 2016;**16**. doi:10.1186/s12884-016-0886-z

- 1  
2  
3 14 Bakken KS, Skjeldal OH, Stray-Pedersen B. Immigrants from conflict-zone countries: an observational  
4 comparison study of obstetric outcomes in a low-risk maternity ward in Norway. *BMC Pregnancy*  
5 *Childbirth* 2015;**15**. doi:10.1186/s12884-015-0603-3  
6  
7 15 Miller LS, Robinson JA, Cibula DA. Healthy Immigrant Effect: Preterm Births Among Immigrants and  
8 Refugees in Syracuse, NY. *Matern Child Health J* 2016;**20**:484–93. doi:10.1007/s10995-015-1846-3  
9  
10 16 Gibson-Helm M, Teede H, Block A, *et al*. Maternal health and pregnancy outcomes among women  
11 of refugee background from African countries: a retrospective, observational study in Australia.  
12 *BMC Pregnancy Childbirth* 2014;**14**:392.  
13  
14 17 Gibson-Helm M, Boyle J, Cheng I-H, *et al*. Maternal health and pregnancy outcomes among women  
15 of refugee background from Asian countries. *Int J Gynecol Obstet* 2015;**129**:146–51.  
16 doi:10.1016/j.ijgo.2014.10.036  
17  
18 18 Gibson-Helm M, Teede H, Cheng I-H, *et al*. Maternal health and pregnancy outcomes comparing  
19 migrant women born in humanitarian and nonhumanitarian source countries: a retrospective,  
20 observational study. *Birth* 2015;**42**:116–24.  
21  
22 19 Urquia ML, Gagnon AJ. Glossary: migration and health. *J Epidemiol Community Health* 2011;**65**:467–  
23 472.  
24  
25 20 Public Health Agency of Canada. Perinatal Health Indicators for Canada - 2011. 2011.  
26 <http://www.phac-aspc.gc.ca/rhs-ssg/phi-isp-2011-eng.php> (accessed 15 Aug 2013).  
27  
28 21 Chiu M, Lebenbaum M, Lam K, *et al*. Describing the linkages of the immigration, refugees and  
29 citizenship Canada permanent resident data and vital statistics death registry to Ontario's  
30 administrative health database. *BMC Med Inform Decis Mak* 2016;**16**. doi:10.1186/s12911-016-  
31 0375-3  
32  
33 22 Joseph KS, Fahey J. Validation of perinatal data in the Discharge Abstract Database of the Canadian  
34 Institute for Health Information. *Chronic Dis Can* 2009;**29**:96–100.  
35  
36 23 Antoniou T, Zagorski B, Loutfy MR, *et al*. Validation of Case-Finding Algorithms Derived from  
37 Administrative Data for Identifying Adults Living with Human Immunodeficiency Virus Infection.  
38 *PLoS ONE* 2011;**6**:e21748. doi:10.1371/journal.pone.0021748  
39  
40 24 Joseph KS, Liu S, Rouleau J, *et al*. Severe maternal morbidity in Canada, 2003 to 2007: surveillance  
41 using routine hospitalization data and ICD-10CA codes. *J Obstet Gynaecol Can* 2010;**32**:837–846.  
42  
43 25 Liu S, Joseph KS, Bartholomew S, *et al*. Temporal trends and regional variations in severe maternal  
44 morbidity in Canada, 2003 to 2007. *J Obstet Gynaecol Can* 2010;**32**:847–855.  
45  
46 26 United Nations Statistics Division. Composition of macro geographical (continental) regions,  
47 geographical sub-regions, and selected economic and other groups.  
48 2013.<http://unstats.un.org/unsd/methods/m49/m49regin.htm> (accessed 13 Oct 2016).  
49  
50 27 Alexander MT, Kufera JA. Butting heads on matched cohort analysis using SAS software. 2007.  
51  
52  
53  
54  
55  
56  
57  
58  
59  
60

- 1  
2  
3 28 Gagnon AJ, Van Hulst A, Merry L, *et al.* Cesarean section rate differences by migration indicators. *Arch Gynecol Obstet* 2013;**287**:633–9. doi:10.1007/s00404-012-2609-7
- 4  
5  
6 29 Hosler AS, Nayak SG, Radigan AM. Stressful events, smoking exposure and other maternal risk  
7 factors associated with gestational diabetes mellitus. *Paediatr Perinat Epidemiol* 2011;**25**:566–574.
- 8  
9  
10 30 Latendresse G. The interaction between chronic stress and pregnancy: preterm birth from a  
11 biobehavioral perspective. *J Midwifery Women's Health* 2009;**54**:8–17.
- 12  
13 31 Wadhwa PD, Entringer S, Buss C, *et al.* The contribution of maternal stress to preterm birth: issues  
14 and considerations. *Clin Perinatol* 2011;**38**:351–84. doi:10.1016/j.clp.2011.06.007
- 15  
16 32 Vang ZM, Sigouin J, Flenon A, *et al.* Are immigrants healthier than native-born Canadians? A  
17 systematic review of the healthy immigrant effect in Canada. *Ethn Health* 2017;**22**:209–41.  
18 doi:10.1080/13557858.2016.1246518
- 19  
20 33 Goosen S, Hoebe CJ, Waldhober Q, *et al.* High HIV prevalence among asylum seekers who gave birth  
21 in the Netherlands: a nationwide study based on antenatal HIV tests. *PLoS One* 2015;**10**:e0134724.
- 22  
23 34 Dennis C-L, Merry L, Stewart D, *et al.* Prevalence, continuation, and identification of postpartum  
24 depressive symptomatology among refugee, asylum-seeking, non-refugee immigrant, and  
25 Canadian-born women: results from a prospective cohort study. *Arch Womens Ment Health*  
26 2016;**19**:959–67. doi:10.1007/s00737-016-0633-5
- 27  
28 35 Dennis C-L, Merry L, Gagnon AJ. Postpartum depression risk factors among recent refugee, asylum-  
29 seeking, non-refugee immigrant, and Canadian-born women: results from a prospective cohort  
30 study. *Soc Psychiatry Psychiatr Epidemiol* 2017;**52**:411–22. doi:10.1007/s00127-017-1353-5
- 31  
32 36 Gann P, Nghiem L, Warner S. Pregnancy characteristics and outcomes of Cambodian refugees. *Am J*  
33 *Public Health* 1989;**79**:1251–7.
- 34  
35 37 Flynn PM, Foster EM, Brost BC. Indicators of acculturation related to Somali refugee women's birth  
36 outcomes in Minnesota. *J Immigr Minor Health* 2011;**13**:224–231.
- 37  
38 38 Kandasamy T, Berniak R, Shah R, *et al.* Obstetric Risks and Outcomes of Refugee Women at a Single  
39 Centre in Toronto. *J Obstet Gynaecol Can* 2014;**36**:296–302.
- 40  
41 39 Davis JM, Goldenring J, McChesney M, *et al.* Pregnancy outcomes of Indochinese refugees, Santa  
42 Clara County, California. *Am J Public Health* 1982;**72**:742–4.
- 43  
44 40 Lalchandani S, MacQuillan K, Sheil O. Obstetric profiles and pregnancy outcomes of immigrant  
45 women with refugee status. *Ir Med J* 2001;**94**:79–80.
- 46  
47 41 King PA, Duthie SJ, Li DFH, *et al.* Obstetric outcome among Vietnamese refugees in Hong Kong: an  
48 age-matched case-controlled study. *Int J Gynaecol Obstet Off Organ Int Fed Gynaecol Obstet*  
49 1990;**33**:203–10.
- 50  
51 42 Malamitsi-Puchner A, Tzala L, Minaretzis D, *et al.* Preterm delivery and low birthweight among  
52 refugees in Greece. *Paediatr Perinat Epidemiol* 1994;**8**:384–390.
- 53  
54  
55  
56  
57  
58  
59  
60

- 1  
2  
3 43 Kuvacic I, Skrablin S, Hodzic D, *et al.* Possible influence of expatriation on perinatal outcome. *Acta*  
4 *Obstet Gynecol Scand* 1996;**75**:367–71.  
5  
6 44 Liu C, Urquia M, Cnattingius S, *et al.* Migration and preterm birth in war refugees: a Swedish cohort  
7 study. *Eur J Epidemiol* 2014;**29**:141–3. doi:10.1007/s10654-013-9877-9  
8  
9 45 Women’s College Hospital. Crossroads Clinic. [http://www.womenscollegehospital.ca/programs-and-](http://www.womenscollegehospital.ca/programs-and-services/crossroads-clinic/)  
10 [services/crossroads-clinic/](http://www.womenscollegehospital.ca/programs-and-services/crossroads-clinic/) (accessed 21 Jul 2017).  
11  
12 46 Access Alliance Multicultural Health and Community Services. <http://accessalliance.ca/> (accessed 21  
13 Jul 2017).  
14  
15 47 Gagnon AJ, DeBruyn R, Essén B, *et al.* Development of the Migrant Friendly Maternity Care  
16 Questionnaire (MFMCQ) for migrants to Western societies: an international Delphi consensus  
17 process. *BMC Pregnancy Childbirth* 2014;**14**:200.  
18  
19 48 Immigration, Refugees & Citizenship Canada. Excessive demand on health and social services.  
20 2016.<http://www.cic.gc.ca/english/resources/tools/medic/admiss/excessive.asp> (accessed 1 May  
21 2017).  
22  
23  
24  
25  
26  
27  
28  
29  
30  
31  
32  
33  
34  
35  
36  
37  
38  
39  
40  
41  
42  
43  
44  
45  
46  
47  
48  
49  
50  
51  
52  
53  
54  
55  
56  
57  
58  
59  
60

1  
2  
3 **Contributors:** SW (1),YS (2), AG (3), DCC (4), MR (5), JB (6), PD (7), RM (8), JGR (9), MLU (10).

4 SW (1) conceived the research questions, designed the study, conducted statistical analysis, interpreted  
5 the results and wrote the first and subsequent drafts of the manuscript. RM (8), JGR (9) and MLU (10)  
6 contributed to the research design and data analysis. YS (2), AG (3), DCC (4), MR (5), JB (6), PD (7), RM  
7 (8), JGR (9) and MLU (10) contributed to data interpretation and revisions of the manuscript. MLU (10)  
8 and JGR (9) obtained funding. All authors approved the final version of the submitted manuscript.  
9

10  
11 **Funding:** This study was funded by a grant from the Canadian Institutes of Health Research (CIHR) (MOP  
12 137110). SW is supported by a post-doctoral fellowship funded from this grant. MLU holds a Canada  
13 Research Chair in Applied Population Health. JGR holds a Canada Research Chair in Reproductive, Child  
14 and Youth Health Services and Policy Research.  
15

16  
17 **Competing Interests:** All authors have completed the ICMJE uniform disclosure form at  
18 [www.icmje.org/coi\\_disclosure.pdf](http://www.icmje.org/coi_disclosure.pdf) and declare: no support from any organisation for the submitted  
19 work; no financial relationships with any organisations that might have an interest in the submitted  
20 work in the previous three years; no other relationships or activities that could appear to have  
21 influenced the submitted work  
22  
23  
24  
25  
26  
27  
28  
29  
30  
31  
32  
33  
34  
35  
36  
37  
38  
39  
40  
41  
42  
43  
44  
45  
46  
47  
48  
49  
50  
51  
52  
53  
54  
55  
56  
57  
58  
59  
60

**Table 1: Characteristics of deliveries to refugee immigrant, non-refugee immigrant and Canadian-born mothers in Ontario, Canada 2002-2014.**

|                                                 | <b>Refugee immigrant<br/>(N = 52,360)</b> | <b>Non-refugee immigrant<br/>(N = 360,007)</b> | <b>Canadian-born<br/>(N = 977,045)</b> |
|-------------------------------------------------|-------------------------------------------|------------------------------------------------|----------------------------------------|
| <b>Maternal age, years</b>                      |                                           |                                                |                                        |
| 15-19                                           | 1086 (2.1)                                | 3725 (1.0)                                     | 46,156 (4.7)                           |
| 20-24                                           | 6,863 (13.1)                              | 38,002 (10.6)                                  | 141,442 (14.5)                         |
| 25-29                                           | 15,361 (29.3)                             | 108,010 (30.0)                                 | 272,588 (27.9)                         |
| 30-34                                           | 16,480 (31.5)                             | 125,191 (34.8)                                 | 330,477 (33.8)                         |
| 35-39                                           | 9762 (18.6)                               | 68,930 (19.1)                                  | 155,966 (16.0)                         |
| ≥ 40                                            | 2793 (5.3)                                | 16,107 (4.5)                                   | 30,012 (3.1)                           |
| Missing                                         | 15 (0.0)                                  | 42 (0.0)                                       | 404 (0.0)                              |
| <b>Parity at the index birth</b>                |                                           |                                                |                                        |
| 0                                               | 19,262 (36.8)                             | 155,919 (43.3)                                 | 454,583 (46.5)                         |
| 1                                               | 16,786 (32.1)                             | 135,095 (37.5)                                 | 343,647 (35.2)                         |
| 2                                               | 8956 (17.1)                               | 47,971 (13.3)                                  | 123,575 (12.6)                         |
| ≥3                                              | 7301 (13.9)                               | 20,706 (5.8)                                   | 53,871 (5.5)                           |
| Missing                                         | 55 (0.1)                                  | 316 (0.1)                                      | 1369 (0.1)                             |
| <b>Neighbourhood income quintile</b>            |                                           |                                                |                                        |
| 1 (lowest)                                      | 23,160 (44.2)                             | 112,660 (31.3)                                 | 173,947 (17.8)                         |
| 2,3,4 (middle)                                  | 25,884 (49.4)                             | 211,787 (58.8)                                 | 609,707 (62.4)                         |
| 5 (highest)                                     | 3183 (6.1)                                | 34,487 (9.6)                                   | 187,167 (19.2)                         |
| Missing                                         | 133 (0.3)                                 | 1073 (0.3)                                     | 6224 (0.6)                             |
| <b>Official language ability at immigration</b> |                                           |                                                |                                        |
| English and/or French                           | 29,679 (56.7)                             | 227,096 (63.1)                                 | --                                     |
| Neither English or French                       | 22,681 (43.3)                             | 132,903 (36.9)                                 | --                                     |
| Missing                                         | 0 (0)                                     | 8 (0)                                          | --                                     |
| <b>Level of education at immigration</b>        |                                           |                                                |                                        |
| 0-9 years                                       | 23,800 (45.5)                             | 88,850 (24.7)                                  | --                                     |
| 10-12 years                                     | 15,204 (29)                               | 74,455 (20.7)                                  | --                                     |
| ≥ 13 years                                      | 4463 (8.5)                                | 33,550 (9.3)                                   | --                                     |
| Trade, Diplomas                                 | 5170 (9.9)                                | 43,855 (12.2)                                  | --                                     |
| Bachelors, Masters, Doctorate                   | 3723 (7.1)                                | 119,297 (33.1)                                 | --                                     |
| <b>Duration of residence, years</b>             |                                           |                                                |                                        |
| < 10                                            | 30,450 (58.2)                             | 257,345 (71.5)                                 | --                                     |
| ≥ 10                                            | 21,910 (41.8)                             | 102,662 (28.5)                                 | --                                     |
| <b>World region of birth</b>                    |                                           |                                                |                                        |
| South Asia                                      | 14,360 (27.4)                             | 118,942 (33)                                   | --                                     |
| Sub Saharan Africa                              | 13,052 (24.9)                             | 19,547 (5.4)                                   | --                                     |
| Latin America & Caribbean                       | 6974 (13.3)                               | 48,575 (13.5)                                  | --                                     |
| Western & Central Asia, North Africa            | 5247 (10.0)                               | 27,803 (7.7)                                   | --                                     |
| Eastern Europe                                  | 4535 (8.7)                                | 25,948 (7.2)                                   | --                                     |
| Southeast Asia, Oceania Islands                 | 2216 (4.2)                                | 40,495 (11.2)                                  | --                                     |
| East Asia (excluding Japan)                     | 2671 (5.1)                                | 46,486 (12.9)                                  | --                                     |
| Southern Europe                                 | 2914 (6.0)                                | 11,729 (3.0)                                   | --                                     |
| Developed Countries                             | 381 (1.0)                                 | 20,371 (6.0)                                   | --                                     |
| Missing                                         | 10 (0.0)                                  | 111 (0.0)                                      | --                                     |



Figure 1: Adverse maternal outcomes comparing 30,747 deliveries to refugee immigrants (● circles) vs. 30,747 deliveries to non-refugee immigrants (○ circles), 1:1 matched on country of birth. Risk ratios adjusted for maternal age, parity, income quintile, official language ability, education and duration of residence.

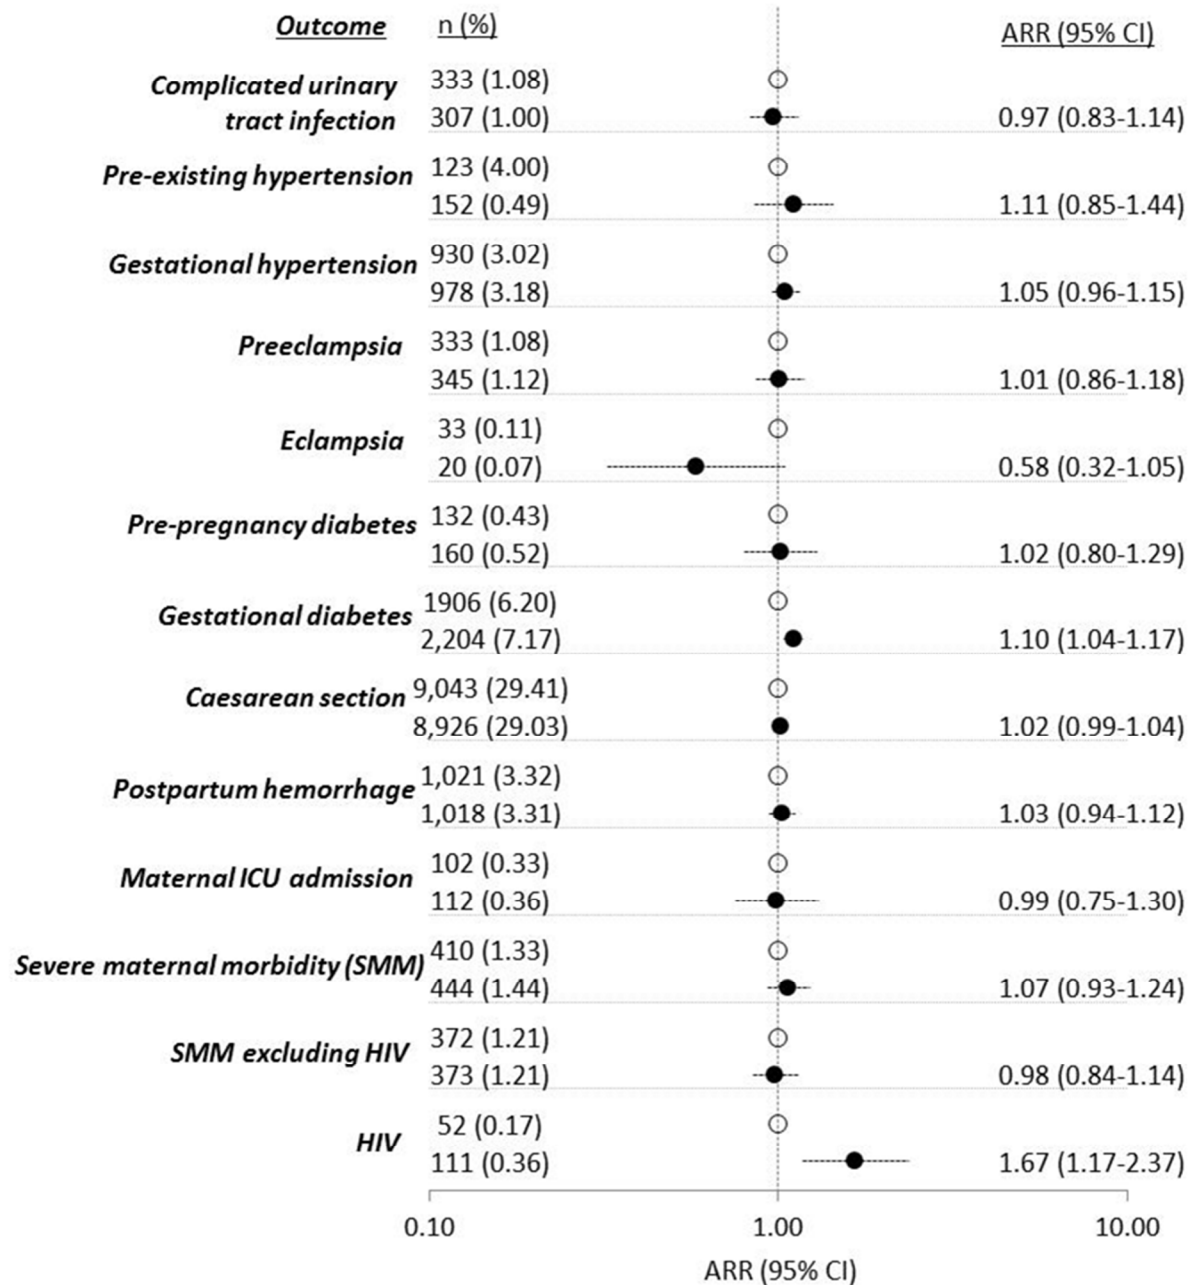

ARR – adjusted risk ratio; CI – confidence interval; ICU – intensive care unit; HIV – human immunodeficiency virus

Figure 2: Adverse perinatal outcomes comparing births to refugee immigrants (●circles) vs. births to non-refugee immigrants (○circles), 1:1 matched on country of birth. Risk ratios adjusted for maternal age, parity, income quintile, official language ability, education and duration of residence.

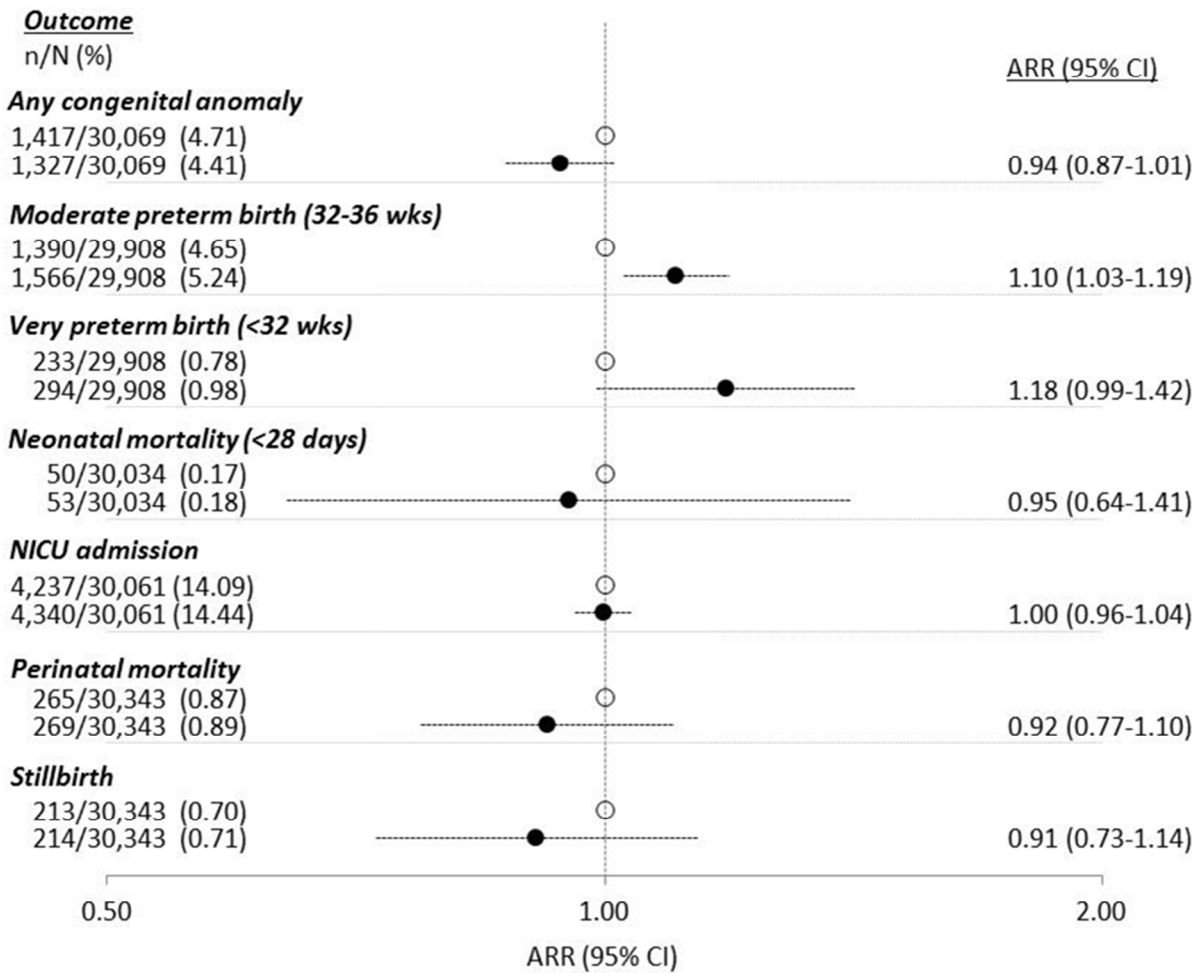

ARR – adjusted risk ratio; CI – confidence interval; NICU – neonatal intensive care unit

Figure 3: Adverse maternal outcomes comparing 52,360 deliveries to refugee immigrants (● circles) and 360,007 deliveries to non-refugee immigrants (● circles) vs. 977,045 deliveries to Canadian-born (○ circles) mothers. Risk ratios adjusted for maternal age, parity and income quintile.

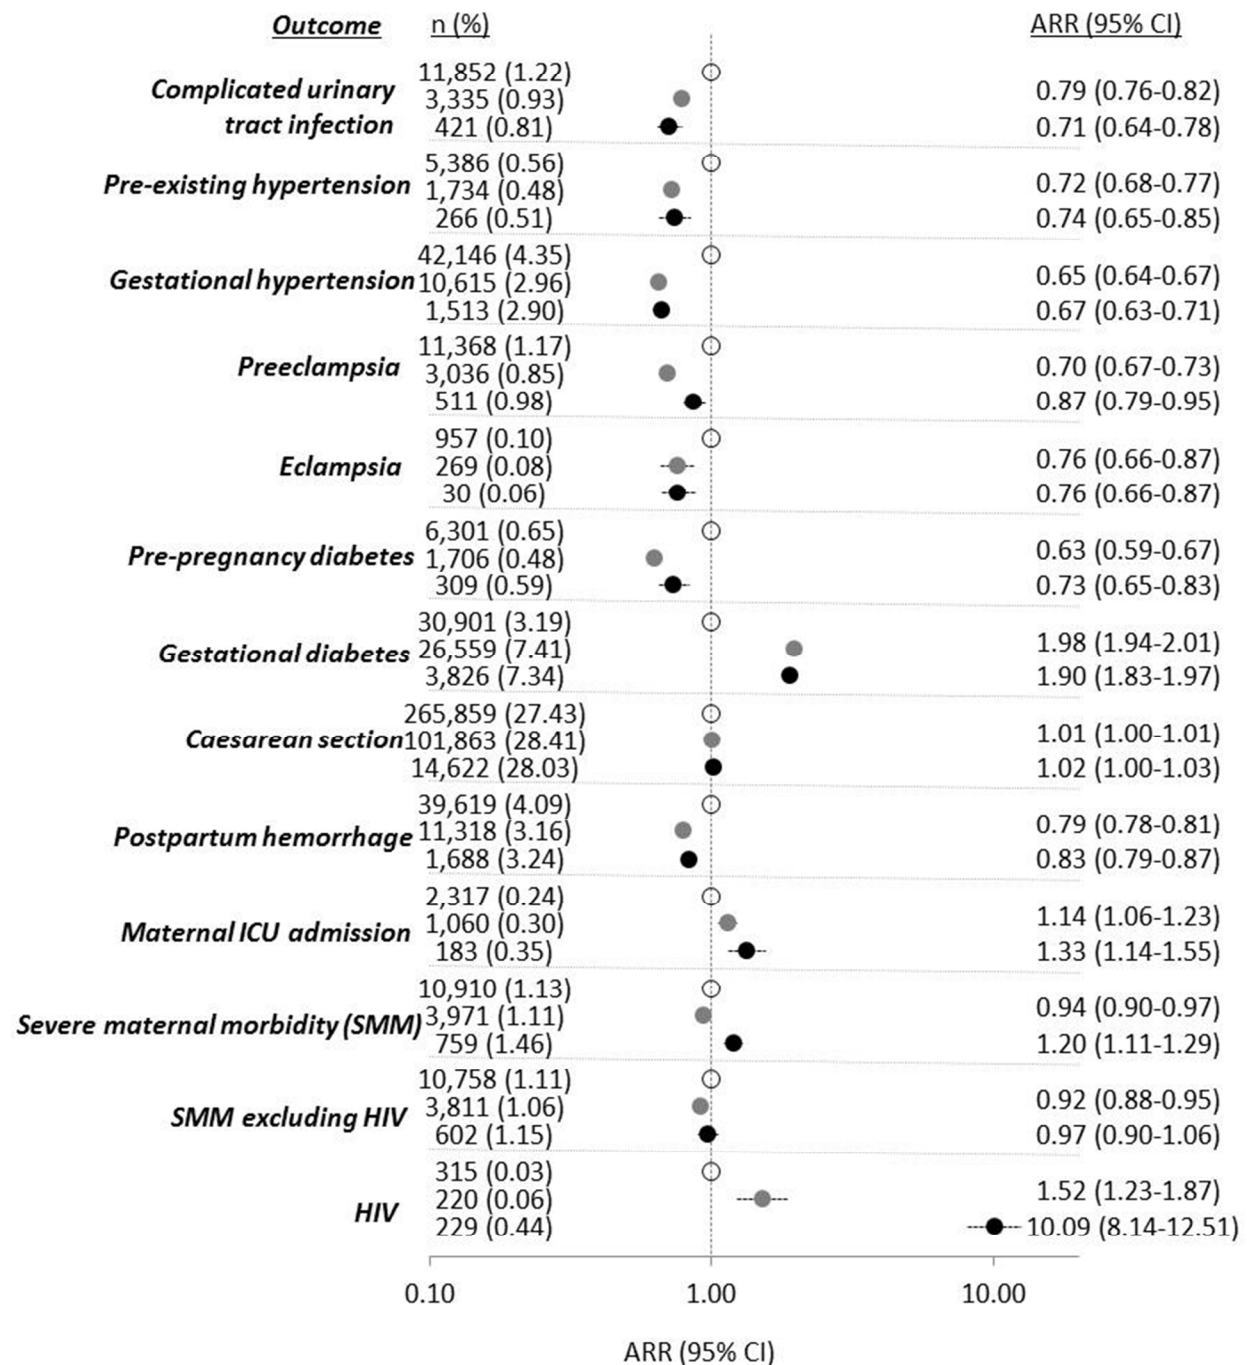

ARR – adjusted risk ratio; CI – confidence interval; ICU – intensive care unit; HIV – human immunodeficiency virus

Figure 4: Adverse perinatal outcomes comparing births to refugee immigrants (●circles) and births to non-refugee immigrants (●circles) vs. births to Canadian-born mothers (○circles). Risk ratios adjusted for maternal age, parity, and income quintile.

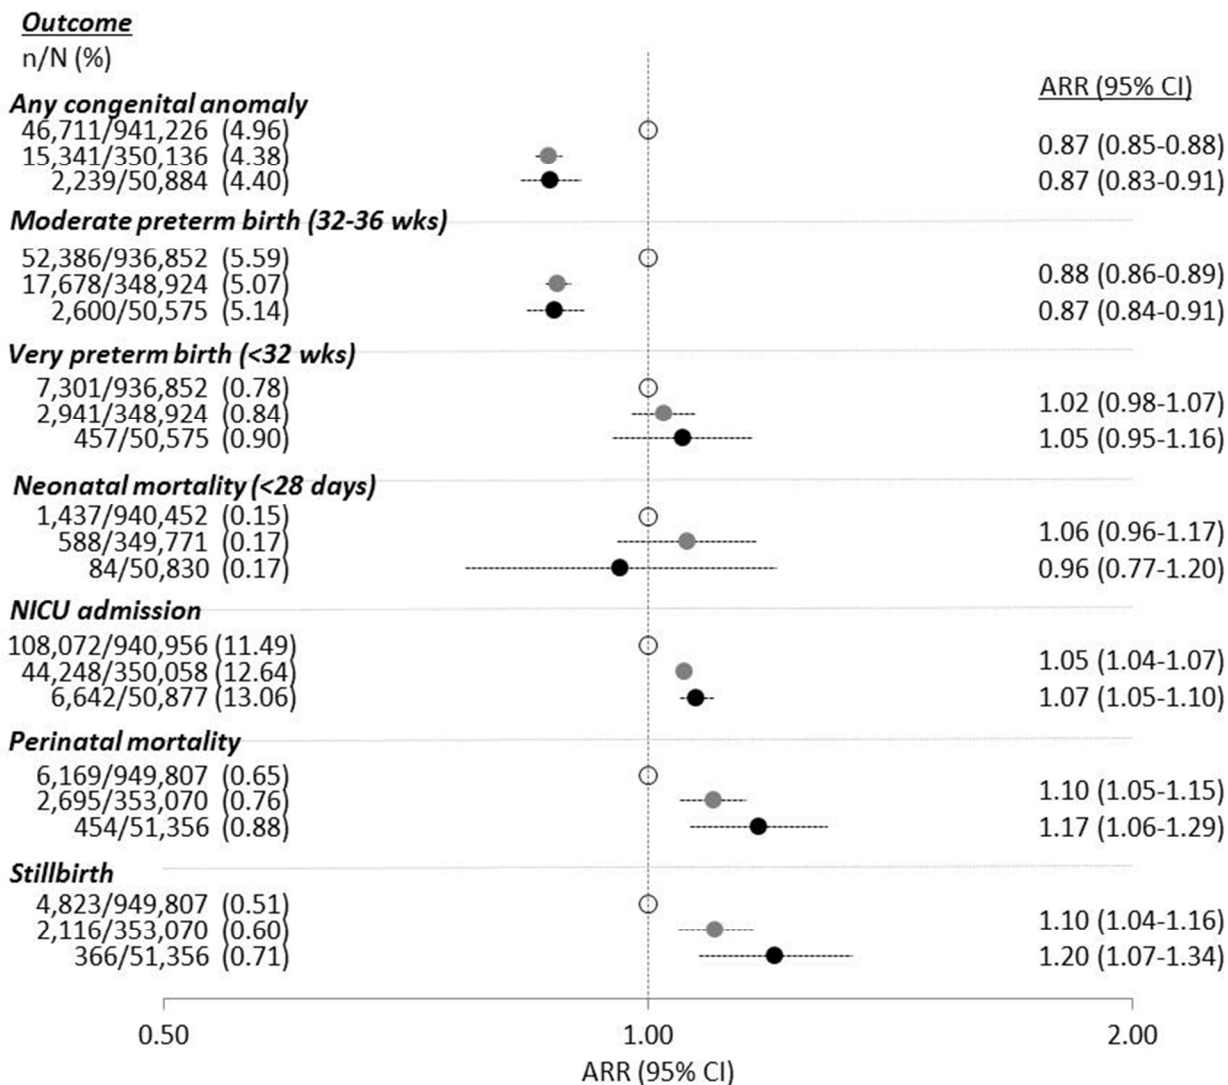

ARR – adjusted risk ratio; CI – confidence interval; NICU – neonatal intensive care unit

Wanigaratne *et al* - Supplementary Material

## Refugee maternal and perinatal health in Ontario Canada: a retrospective population-based study

## SUPPLEMENTARY TABLES

Table S1: List of 10th revision of the *International Statistical Classification of Diseases and Related Health Problems*, Canadian enhancement, and *Canadian Classification of Health Interventions* (ICD-10-CA/CCI) codes for maternal and perinatal outcomes

| Maternal or Perinatal Outcome                 | Definition                                                                 | Source Database | ICD-10-CA/CCI                                              |
|-----------------------------------------------|----------------------------------------------------------------------------|-----------------|------------------------------------------------------------|
| Complicated urinary tract infection           |                                                                            | CIHI-DAD        | O23, O86, N39                                              |
| Pre-existing hypertension                     |                                                                            | CIHI-DAD        | O10, O11                                                   |
| Gestational hypertension                      |                                                                            | CIHI-DAD        | O13                                                        |
| Preeclampsia                                  |                                                                            |                 | O14                                                        |
| Eclampsia                                     |                                                                            | CIHI-DAD        | O15                                                        |
| Pre-pregnancy diabetes mellitus               |                                                                            | CIHI-DAD        | O24.0-O24.3                                                |
| Gestational diabetes mellitus (GDM)           |                                                                            | CIHI-DAD        | O24.4                                                      |
| Caesarean delivery                            |                                                                            | CIHI-DAD        | 5.MD.60.^                                                  |
| Post-partum hemorrhage                        |                                                                            | CIHI-DAD        | O72                                                        |
| Maternal intensive care unit (ICU) admission  |                                                                            | CIHI-DAD        | Special Care Unit 1-6                                      |
| Severe maternal morbidity                     |                                                                            | CIHI-DAD        | See Joseph <i>et al</i> , 2010*                            |
| HIV                                           | Three physician diagnoses within three years.                              | Ontario HIV DB  |                                                            |
| Congenital anomaly                            | An abnormality of structure or function present at birth                   | CIHI-DAD        | ICD-10: Q00-Q99                                            |
| Moderate preterm birth (PTB)                  | Live birth with gestational age 32-36 weeks                                | CIHI-DAD        | 32-36 weeks gestation recorded on CIHI-DAD birth record    |
| Very preterm birth (VPTB)                     | Live birth with gestational age <32 weeks                                  | CIHI-DAD        | < 32 weeks gestation recorded on CIHI-DAD birth record     |
| Neonatal mortality                            | Death <28 days of life                                                     | RPDB, ORG-VSD   |                                                            |
| Neonatal intensive care unit (NICU) admission |                                                                            | CIHI-DAD        | Special care unit admission, any level                     |
| Perinatal mortality                           | Stillbirth or death of live born infant < 7 days of life                   | RPDB, ORG-VSD   |                                                            |
| Stillbirth                                    | Intrauterine fetal death $\geq$ 20 weeks gestation and > 500 g birthweight | CIHI-DAD        | Maternal record: Z371, Z373-7, O364.<br>Infant record: P95 |

## Abbreviations

ICD-10-CA/CCI - 10th revision of the *International Statistical Classification of Diseases and Related Health Problems*, Canadian enhancement, and *Canadian Classification of Health Interventions* (ICD-10-CA/CCI)

CIHI-DAD – Canadian Institute for Health Information – Discharge Abstract Database

RPDB – Registered Persons Database (referred to as “Ontario Health Care Registry” in paper)

ORGD-VSD – Office of the Registrar General’s Vital Statistics-Death Registry

\* Joseph KS, Liu S, Rouleau J, Kirby RS, Kramer MS, Sauve R, *et al*. Severe maternal morbidity in Canada, 2003 to 2007: surveillance using routine hospitalization data and ICD-10CA codes. *J Obstet Gynaecol Can*. 2010;32(9):837

Wanigaratne *et al* - Supplementary Material

Refugee maternal and perinatal health in Ontario Canada: a retrospective population-based study

Table S2: Unadjusted Risk Ratios (RR) (95% CI) for Figures 1 and 2

| <b>FIGURE 1</b>                        |                               |
|----------------------------------------|-------------------------------|
| <b>OUTCOME</b>                         | <b>UNADJUSTED RR (95% CI)</b> |
| Complicated urinary tract infection    | 0.92 (0.79-1.08)              |
| Pre-existing hypertension              | 1.24 (0.97-1.57)              |
| Gestational hypertension               | 1.05 (0.96-1.15)              |
| Preeclampsia                           | 1.04 (0.89-1.20)              |
| Eclampsia                              | 0.61 (0.35-1.06)              |
| Pre-pregnancy diabetes mellitus        | 1.21 (0.96-1.52)              |
| Gestational diabetes mellitus (GDM)    | 1.16 (1.09-1.23)              |
| Caesarean delivery                     | 0.99 (0.96-1.01)              |
| Post-partum hemorrhage                 | 1.00 (0.92-1.09)              |
| Maternal intensive care unit admission | 1.10 (0.84-1.44)              |
| Severe maternal morbidity (SMM)        | 1.08 (0.95-1.24)              |
| SMM excluding HIV                      | 1.00 (0.87-1.16)              |
| HIV                                    | 2.14 (1.54-2.96)              |
| <b>FIGURE 2</b>                        |                               |
| <b>OUTCOME</b>                         | <b>UNADJUSTED RR (95% CI)</b> |
| Congenital anomaly                     | 0.94 (0.89-0.99)              |
| Moderate preterm birth (MPTB)          | 1.13 (1.05-1.21)              |
| Very preterm birth (VPTB)              | 1.26 (1.06-1.50)              |
| Neonatal mortality                     | 1.06 (0.72-1.56)              |
| Neonatal intensive care unit admission | 1.02 (0.99-1.06)              |
| Perinatal mortality                    | 1.02 (0.86-1.20)              |
| Stillbirth                             | 1.00 (0.83-1.21)              |

Wanigaratne *et al* - Supplementary Material

Refugee maternal and perinatal health in Ontario Canada: a retrospective population-based study

Table S3: Unadjusted Risk Ratios (RR) (95% CI) for Figures 3 and 4

| FIGURE 3<br>OUTCOME                           | UNADJUSTED RR (95% CI) |                      |
|-----------------------------------------------|------------------------|----------------------|
|                                               | REFUGEES VS. CDN       | NON-REFUGEES VS. CDN |
| Complicated urinary tract infection           | 0.66 (0.60-0.73)       | 0.76 (0.73-0.79)     |
| Pre-existing hypertension                     | 0.92 (0.81-1.05)       | 0.86 (0.81-0.91)     |
| Gestational hypertension                      | 0.67 (0.63-0.70)       | 0.68 (0.66-0.69)     |
| Preeclampsia                                  | 0.83 (0.76-0.91)       | 0.72 (0.69-0.75)     |
| Eclampsia                                     | 0.58 (0.40-0.84)       | 0.60 (0.42-0.86)     |
| Pre-pregnancy diabetes mellitus               | 0.35 (0.30-0.39)       | 0.72 (0.68-0.76)     |
| Gestational diabetes mellitus (GDM)           | 2.27 (2.19-2.36)       | 2.30 (2.26-2.34)     |
| Caesarean delivery                            | 1.03 (1.02-1.05)       | 1.05 (1.05-1.06)     |
| Post-partum hemorrhage (PPH)                  | 0.80 (0.76-0.84)       | 0.78 (0.77-0.80)     |
| Maternal intensive care unit admission        | 1.46 (1.26-1.70)       | 1.23 (1.15-1.33)     |
| Severe maternal morbidity (SMM)               | 1.29 (1.20-1.40)       | 0.98 (0.95-1.02)     |
| SMM without HIV                               | 1.04 (0.96-1.13)       | 0.96 (0.92-0.99)     |
| HIV                                           | 13.84 (11.32-16.93)    | 1.85 (1.51-2.26)     |
| FIGURE 4<br>OUTCOME                           |                        |                      |
| Congenital anomaly                            | 0.89 (0.85-0.92)       | 0.88 (0.87-0.90)     |
| Moderate preterm birth (MPTB)                 | 0.92 (0.89-0.96)       | 0.91 (0.89-0.92)     |
| Very preterm birth (VPTB)                     | 1.08 (1.03-1.13)       | 1.16 (1.06-1.28)     |
| Neonatal mortality                            | 1.08 (0.87-1.35)       | 1.10 (1.00-1.21)     |
| Neonatal intensive care unit (NICU) admission | 1.13 (1.11-1.16)       | 1.10 (1.09-1.11)     |
| Perinatal mortality                           | 1.36 (1.24-1.50)       | 1.17 (1.12-1.23)     |
| Stillbirth                                    | 1.40 (1.26-1.56)       | 1.18 (1.12-1.24)     |

Wanigaratne *et al* - Supplementary Material

Refugee maternal and perinatal health in Ontario Canada: a retrospective population-based study

SUPPLEMENTARY FIGURES

**Figure S1a: Adverse maternal outcomes comparing 5,724 deliveries to Sri Lankan refugee immigrants (▲ triangles) vs. 17,373 deliveries to Sri Lankan non-refugee immigrants (△ triangles). Risk ratios adjusted for maternal age, parity, income quintile, official language ability, education and duration of residence.**

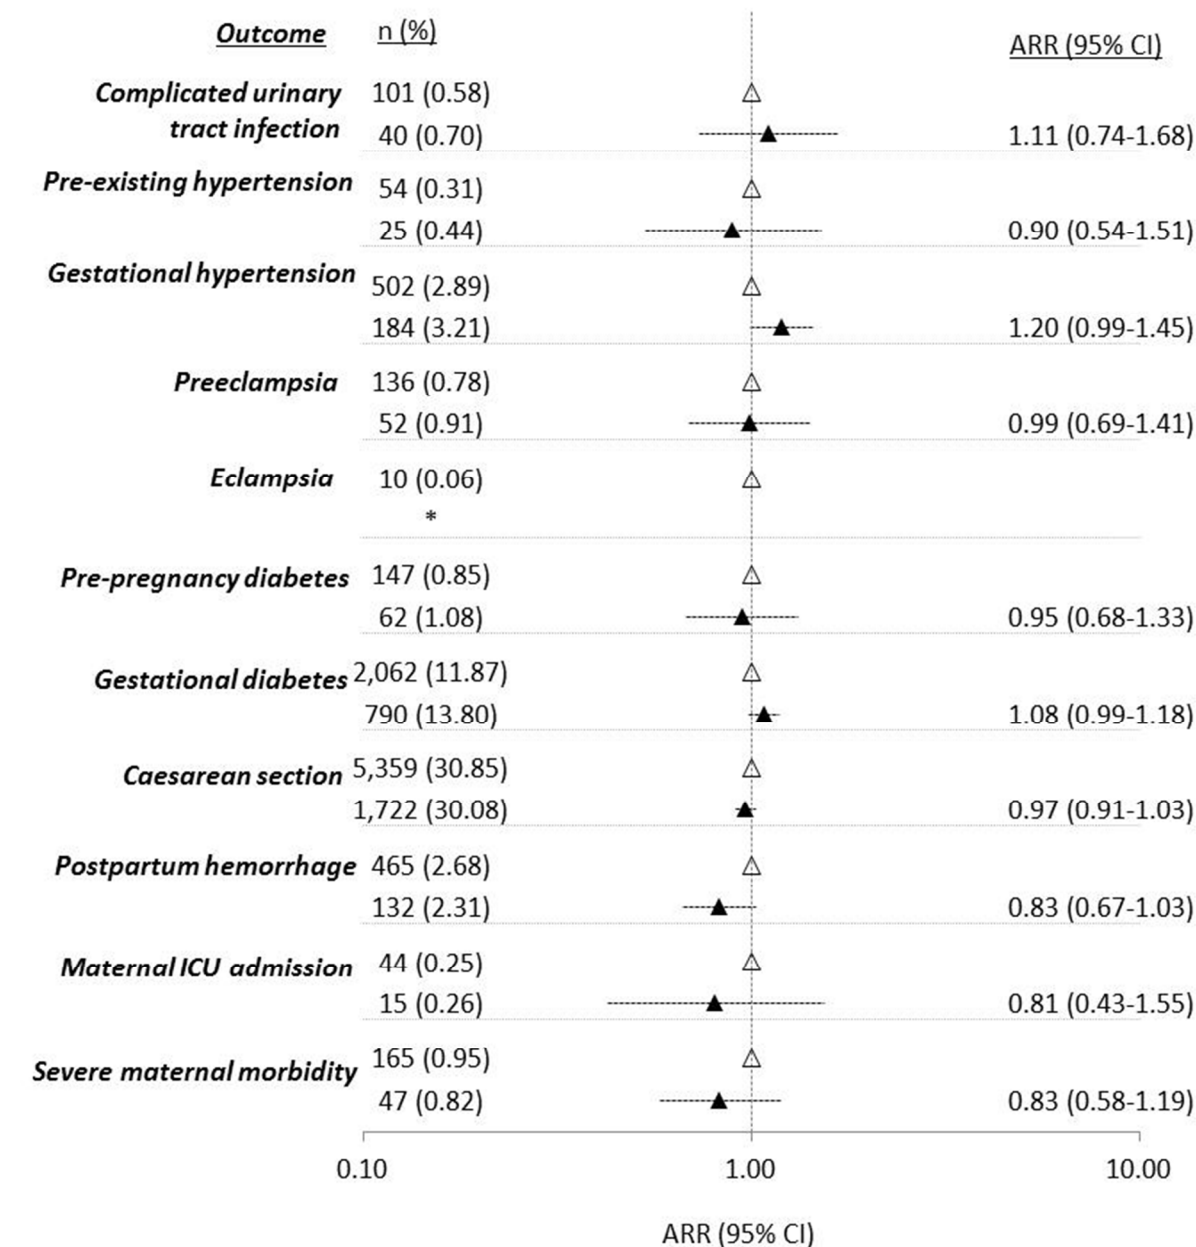

ARR – adjusted risk ratio; CI – confidence interval; ICU – intensive care unit; HIV – human immunodeficiency virus



Wanigaratne *et al* - Supplementary Material

Refugee maternal and perinatal health in Ontario Canada: a retrospective population-based study

**Figure S1b: Adverse perinatal outcomes comparing births to Sri Lankan refugee immigrants (▲ triangles) vs. births to Sri Lankan non-refugee immigrants (△ triangles). Risk ratios adjusted for maternal age, parity, income quintile, official language ability, education and duration of residence.**

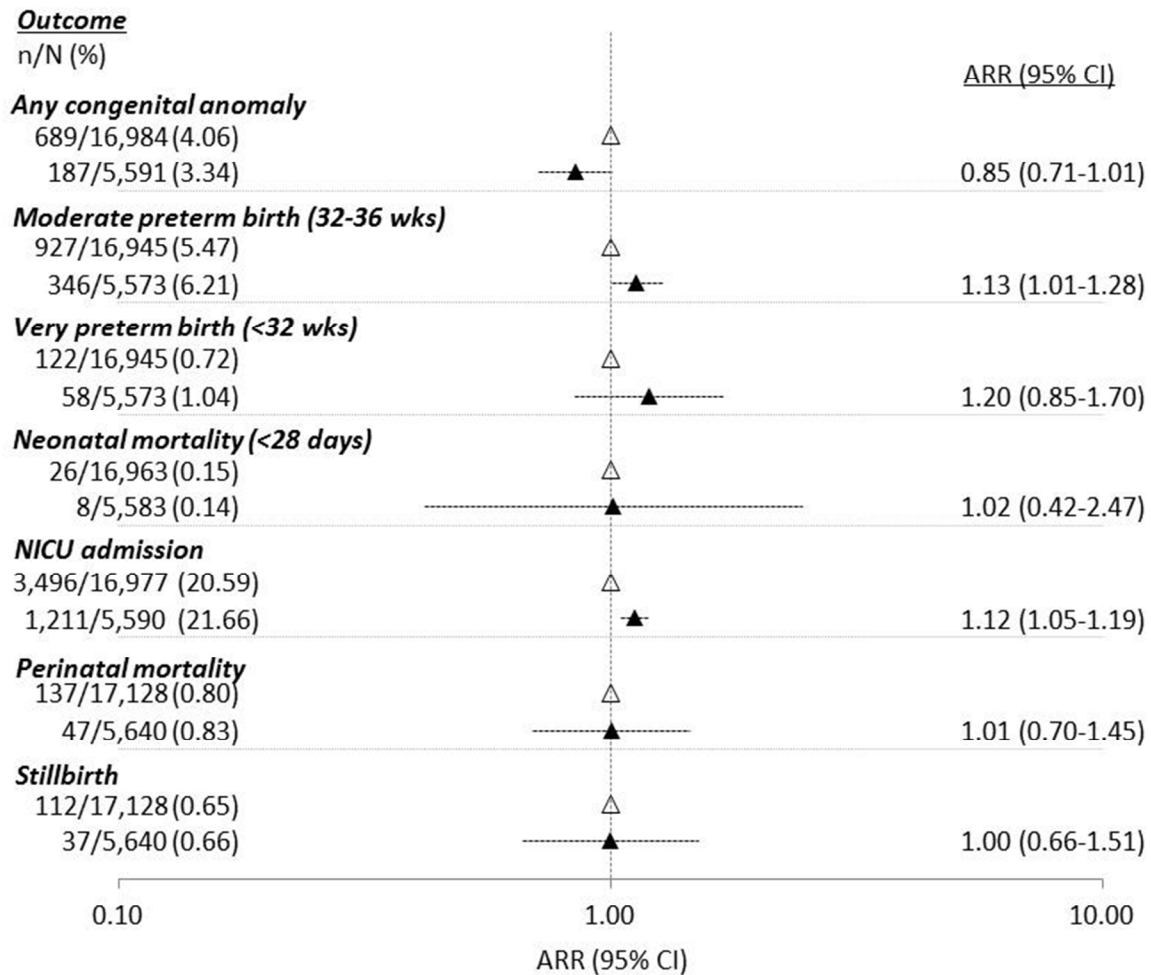

ARR – adjusted risk ratio; CI – confidence interval; NICU – neonatal intensive care unit

Wanigaratne *et al* - Supplementary Material

Refugee maternal and perinatal health in Ontario Canada: a retrospective population-based study

**Figure S2a: Adverse maternal outcomes comparing 2,453 deliveries to Somali refugee immigrants (▲ triangles) vs. 4,499 deliveries to Somali non-refugee immigrants (△ triangles). Risk ratios adjusted for maternal age, parity, income quintile, official language ability, education and duration of residence.**

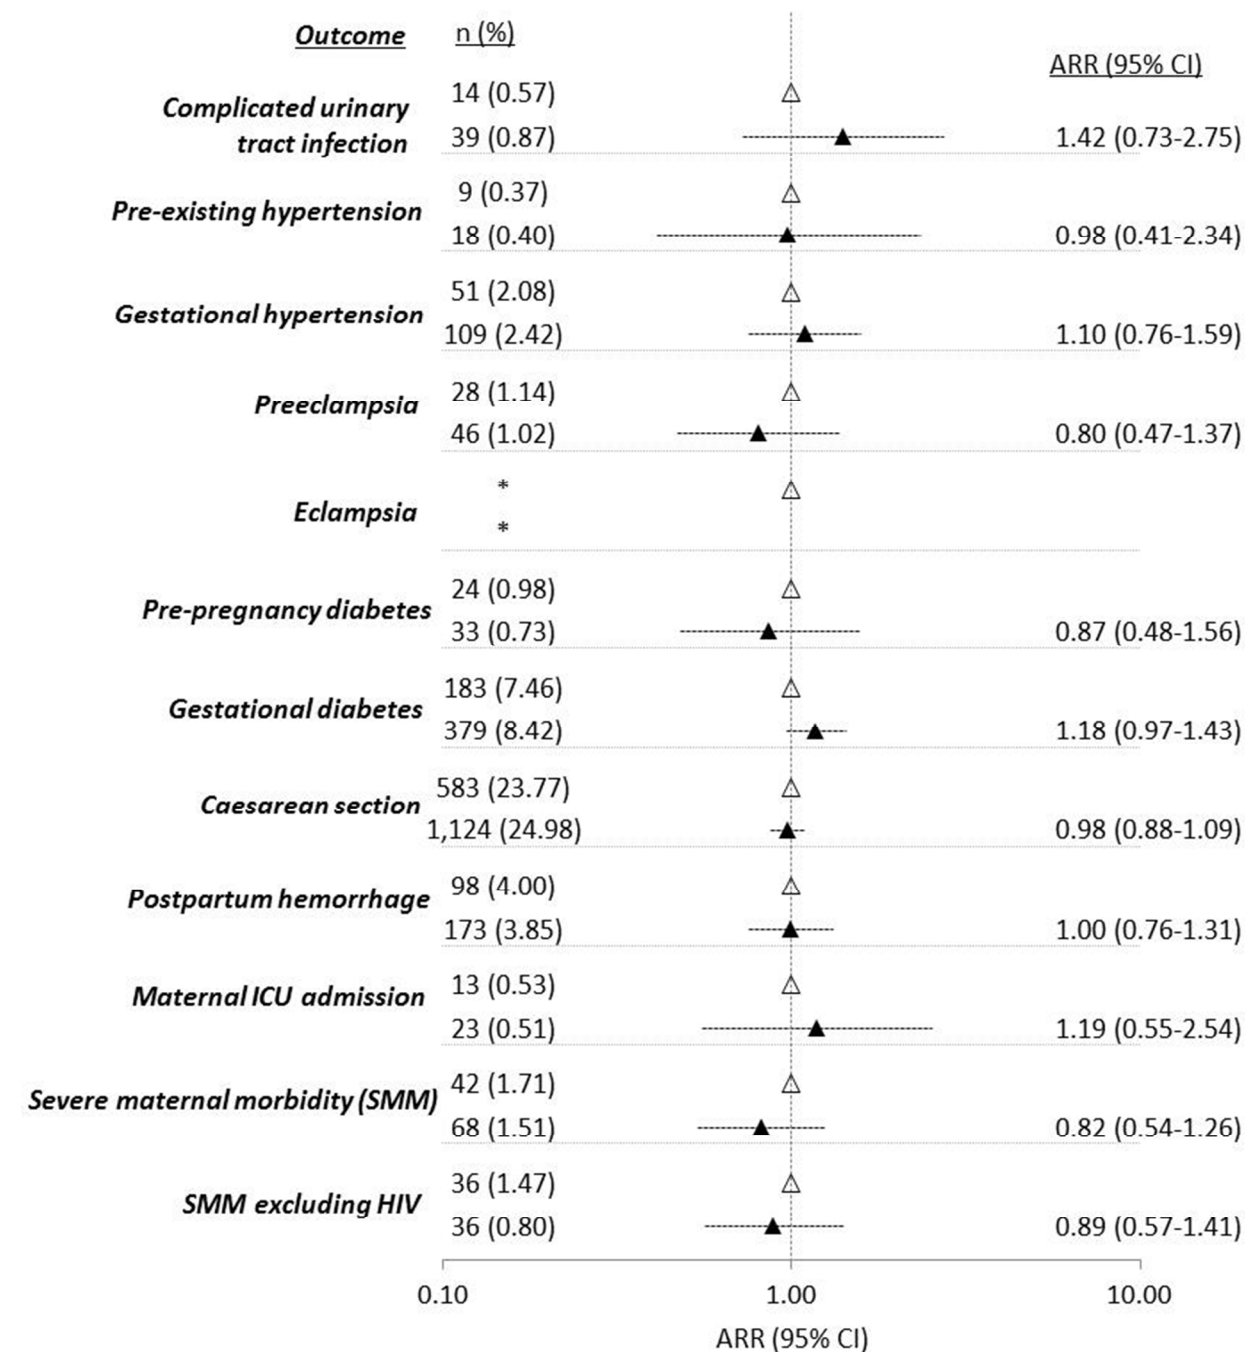

ARR – adjusted risk ratio; CI – confidence interval; ICU – intensive care unit; HIV – human immunodeficiency virus

Wanigaratne *et al* - Supplementary Material

Refugee maternal and perinatal health in Ontario Canada: a retrospective population-based study

**Figure S2b: Adverse perinatal outcomes comparing births to Somali refugee immigrants (▲triangles) vs. births to Somali non-refugee immigrants (△triangles). Risk ratios adjusted for maternal age, parity, income quintile, official language ability, education and duration of residence.**

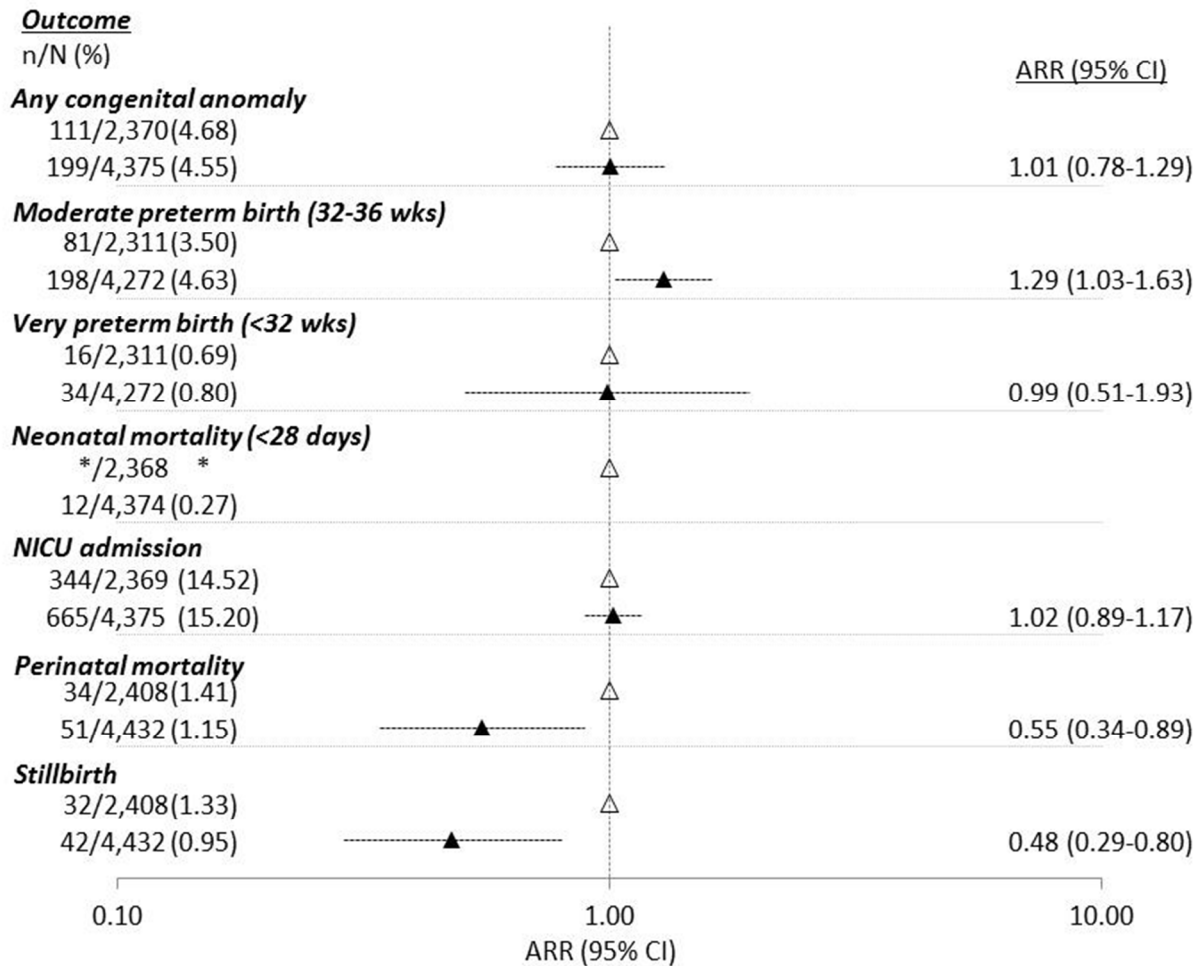

ARR – adjusted risk ratio; CI – confidence interval; NICU – neonatal intensive care unit

Wanigaratne *et al* - Supplementary Material

Refugee maternal and perinatal health in Ontario Canada: a retrospective population-based study

**Figure S3a: Adverse maternal outcomes comparing 4,210 deliveries to Afghan refugee immigrants (▲ triangles) vs. 3,905 deliveries to Afghan non-refugee immigrants (△ triangles). Risk ratios adjusted for maternal age, parity, income quintile, official language ability, education and duration of residence.**

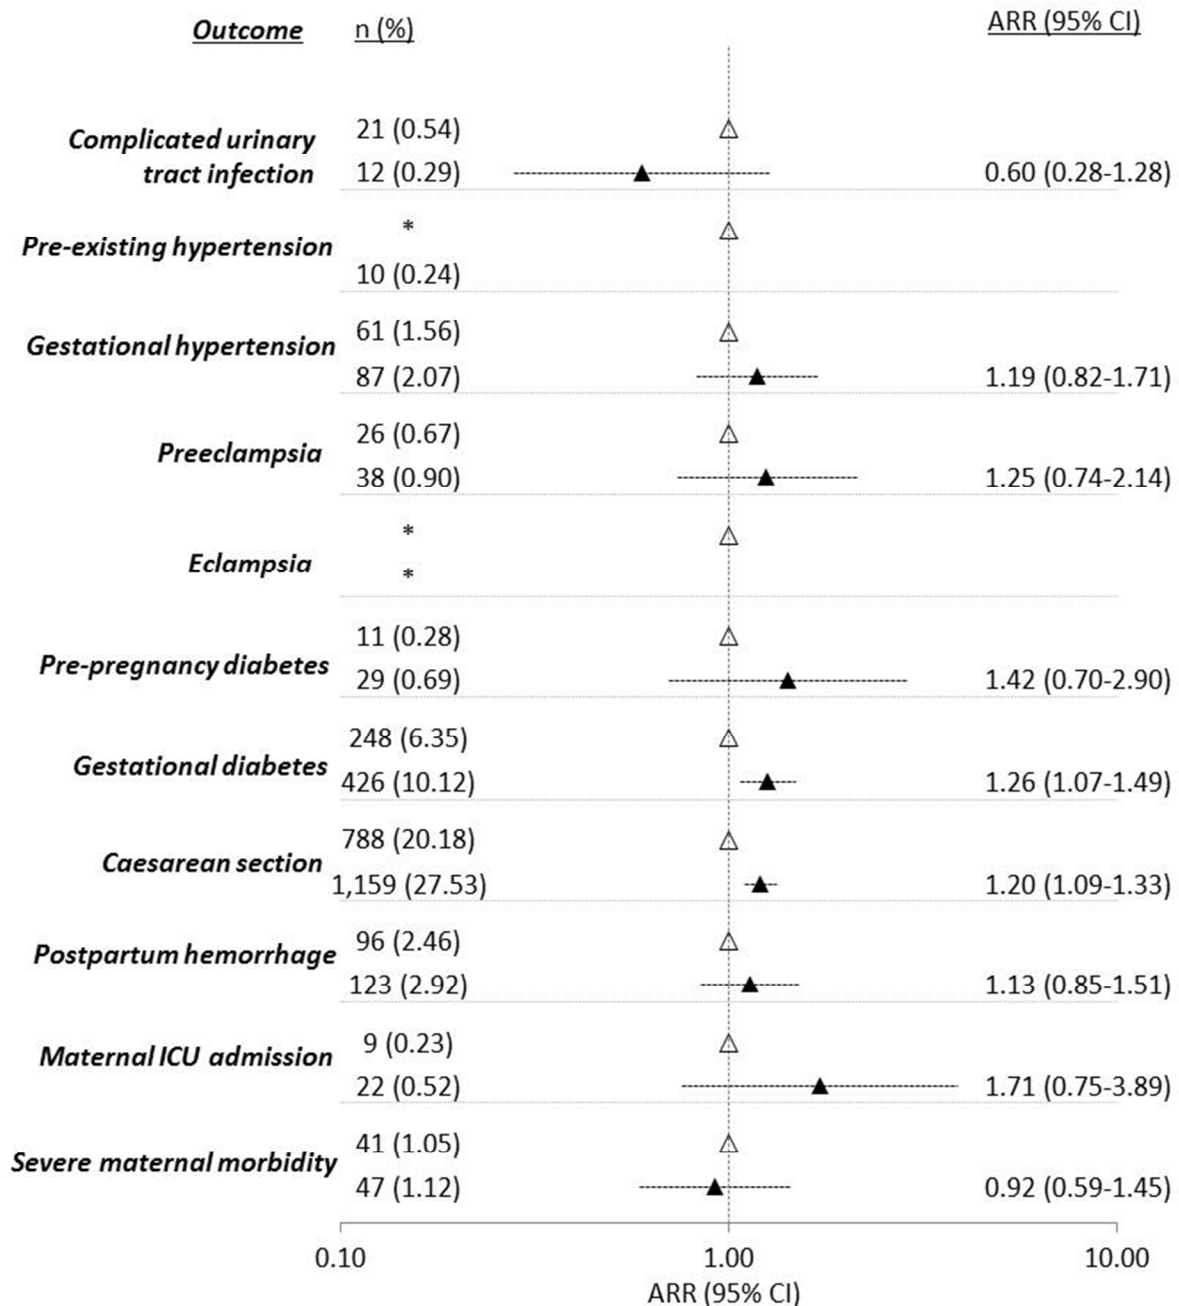

ARR – adjusted risk ratio; CI – confidence interval; ICU – intensive care unit; HIV – human immunodeficiency virus

Wanigaratne *et al* - Supplementary Material

Refugee maternal and perinatal health in Ontario Canada: a retrospective population-based study

**Figure S3b: Adverse perinatal outcomes comparing births to Afghan refugee immigrants (▲ triangles) vs. births to Afghan non-refugee immigrants (△ triangles). Risk ratios adjusted for maternal age, parity, income quintile, official language ability, education and duration of residence.**

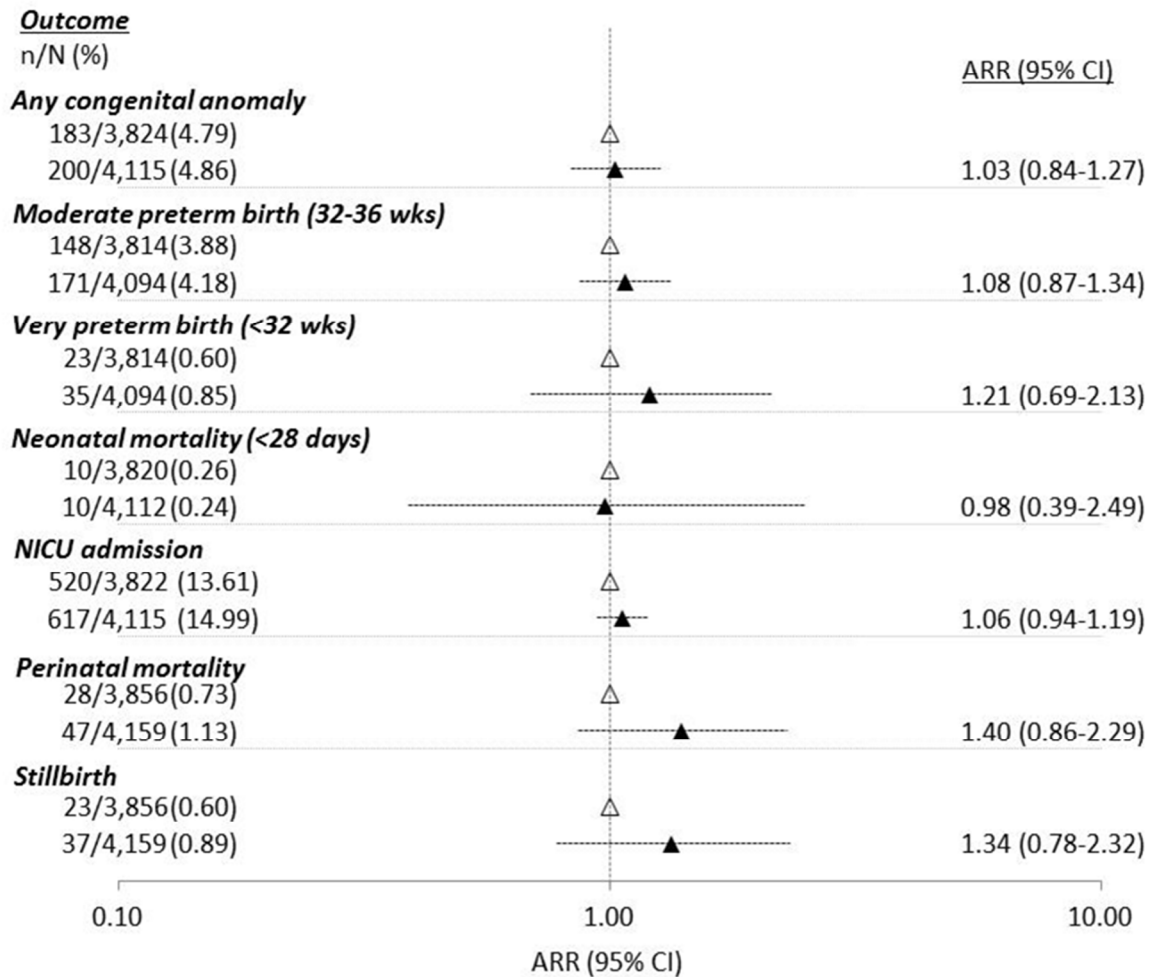

ARR – adjusted risk ratio; CI – confidence interval; NICU – neonatal intensive care unit

Wanigaratne *et al* - Supplementary Material

Refugee maternal and perinatal health in Ontario Canada: a retrospective population-based study

**Figure S4a: Adverse maternal outcomes comparing 2,613 deliveries to Iraqi refugee immigrants (▲ triangles) vs. 4,239 deliveries to Iraqi non-refugee immigrants (△ triangles). Risk ratios adjusted for maternal age, parity, income quintile, official language ability, education and duration of residence.**

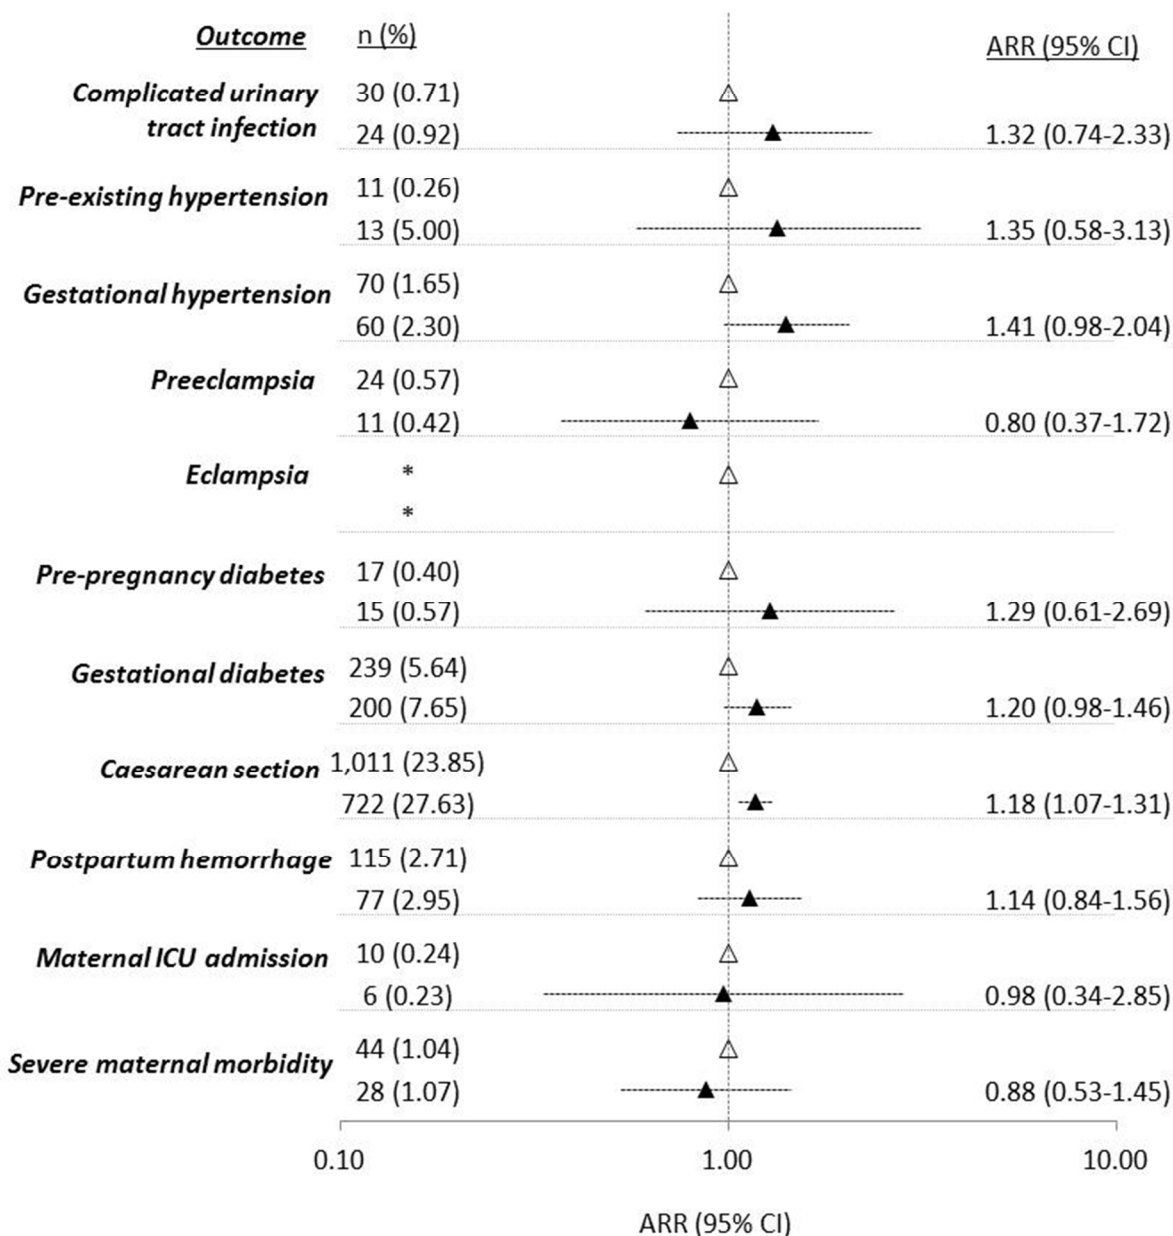

ARR – adjusted risk ratio; CI – confidence interval; ICU – intensive care unit; HIV – human immunodeficiency virus

Wanigaratne *et al* - Supplementary Material

Refugee maternal and perinatal health in Ontario Canada: a retrospective population-based study

**Figure S4b: Adverse perinatal outcomes comparing births to Iraqi refugee immigrants (▲triangles) vs. births to Iraqi non-refugee immigrants (△triangles). Risk ratios adjusted for maternal age, parity, income quintile, official language ability, education and duration of residence**

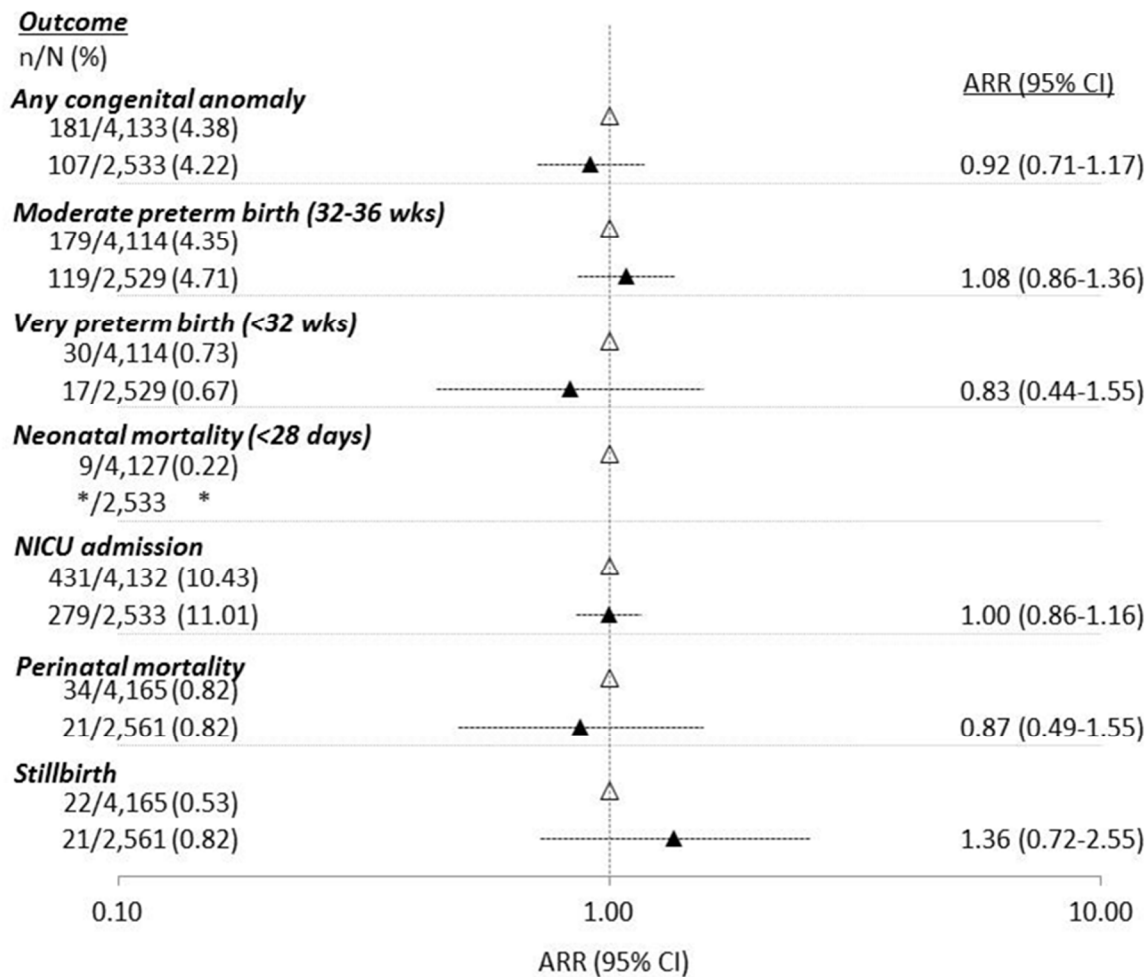

ARR – adjusted risk ratio; CI – confidence interval; NICU – neonatal intensive care unit

Wanigaratne *et al* - Supplementary Material

Refugee maternal and perinatal health in Ontario Canada: a retrospective population-based study

Figure S5a: Adverse maternal outcomes comparing 2,527 deliveries to Chinese refugee immigrants (▲ triangles) vs. 37,093 deliveries to Chinese non-refugee immigrants (△ triangles). Risk ratios adjusted for maternal age, parity, income quintile, official language ability, education and duration of residence.

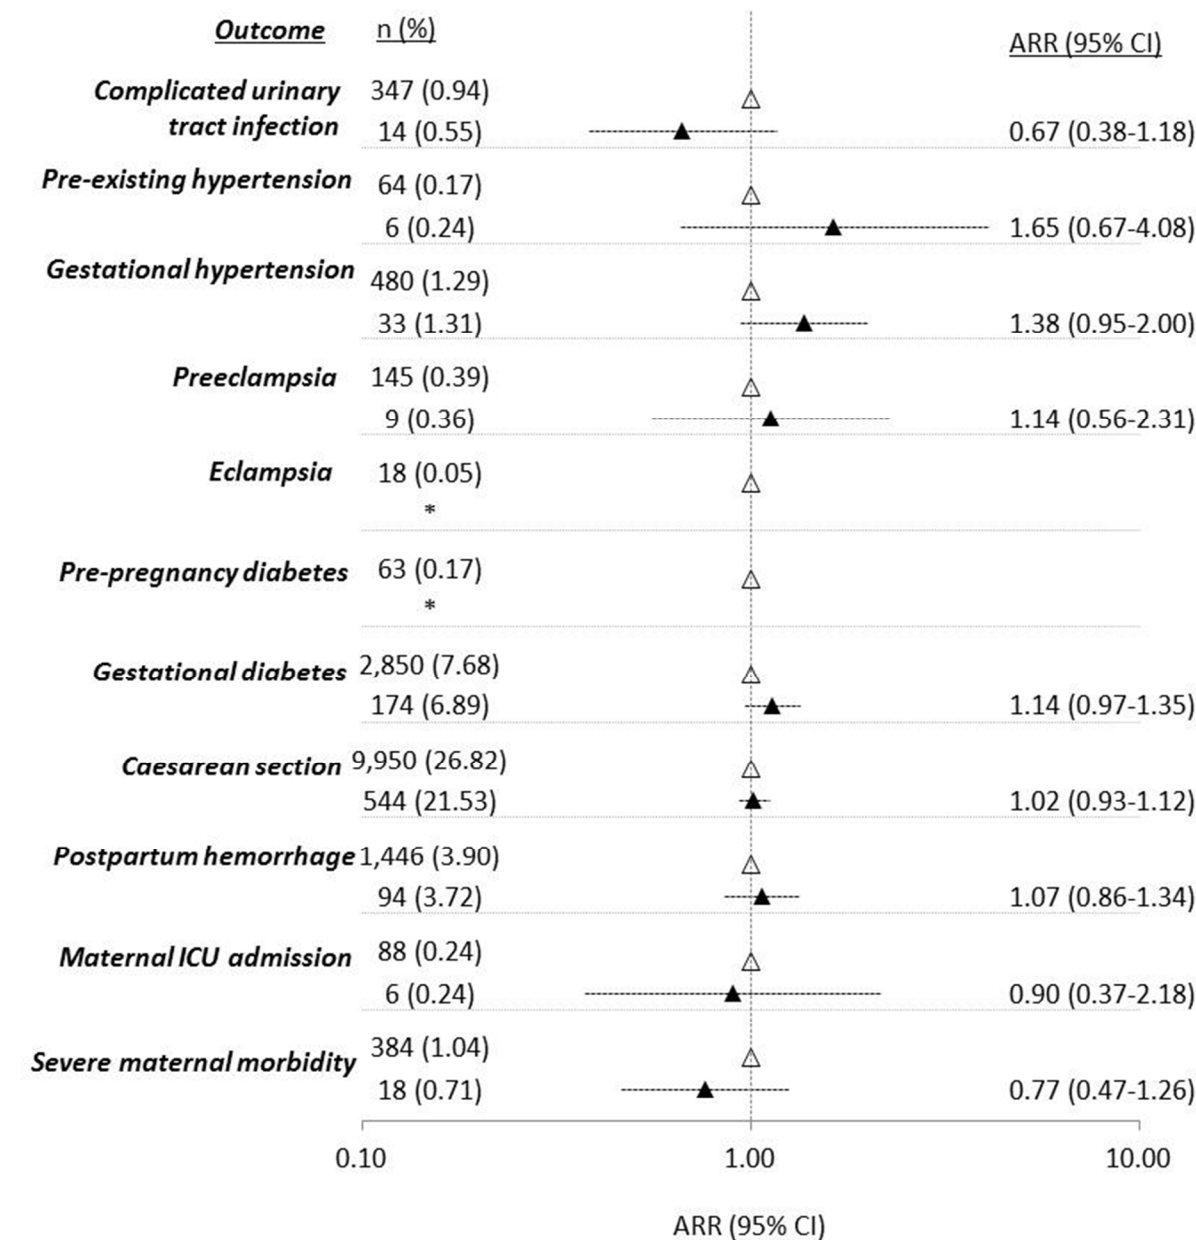

ARR – adjusted risk ratio; CI – confidence interval; ICU – intensive care unit; HIV – human immunodeficiency virus



Wanigaratne *et al* - Supplementary Material

Refugee maternal and perinatal health in Ontario Canada: a retrospective population-based study

**Figure S5b: Adverse perinatal outcomes comparing births to Chinese refugee immigrants (▲triangles) vs. births to Chinese non-refugee immigrants (△triangles). Risk ratios adjusted for maternal age, parity, income quintile, official language ability, education and duration of residence.**

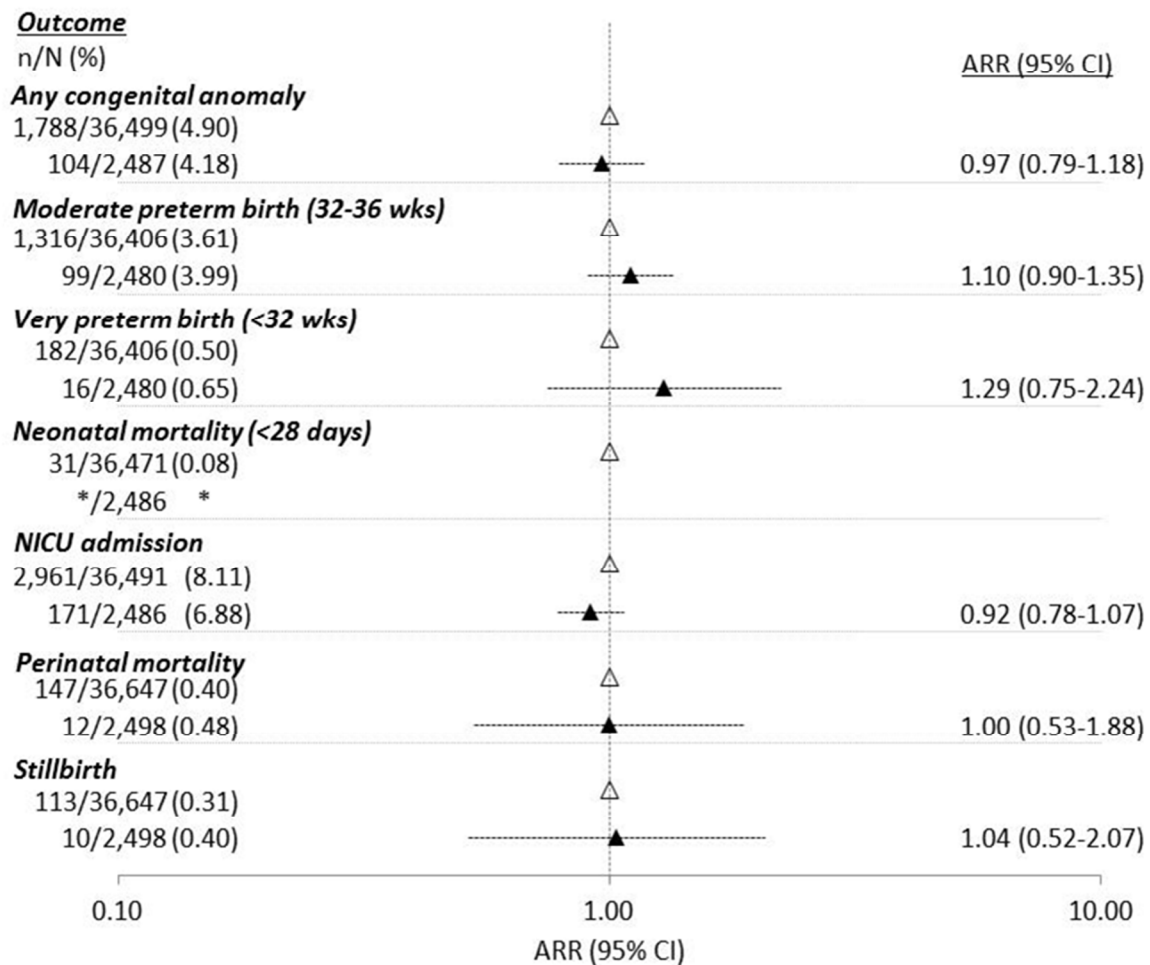

ARR – adjusted risk ratio; CI – confidence interval; NICU – neonatal intensive care unit

Wanigaratne *et al* - Supplementary Material

Refugee maternal and perinatal health in Ontario Canada: a retrospective population-based study

**Figure S6: Adverse maternal outcomes comparing 52,158 deliveries to ALL refugee immigrants (■ squares) vs. 358,589 deliveries to ALL non-refugee immigrants (□ squares), UNMATCHED on country of birth. Risk ratios\* adjusted for maternal age, parity, income quintile, official language ability, education and duration of residence.**

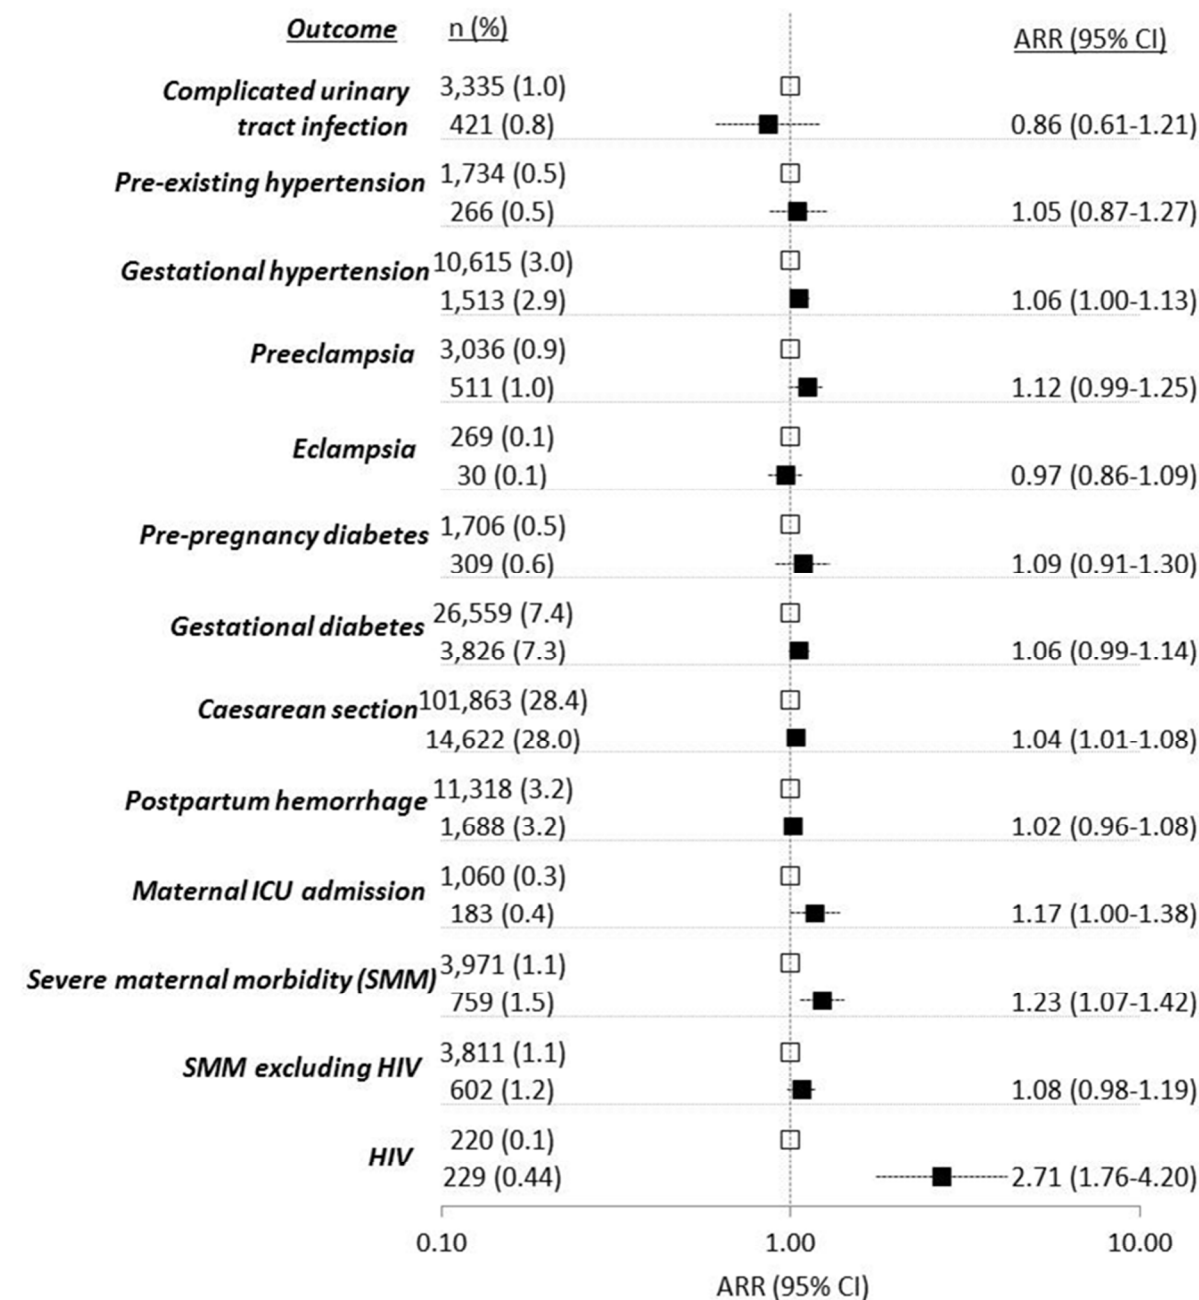

ARR – adjusted risk ratio; CI – confidence interval; ICU – intensive care unit; HIV – human immunodeficiency virus

\*Estimated using log-binomial regression with generalized estimating equations to account for potential correlation among mothers from the same country of birth.

Wanigaratne *et al* - Supplementary Material

Refugee maternal and perinatal health in Ontario Canada: a retrospective population-based study

**Figure S7: Adverse perinatal outcomes comparing births to ALL refugee immigrants (■ squares) vs. births to ALL non-refugee immigrants (□ squares), UNMATCHED on country of birth. Risk ratios\* adjusted for maternal age, parity, income quintile, official language ability, education and duration of residence.**

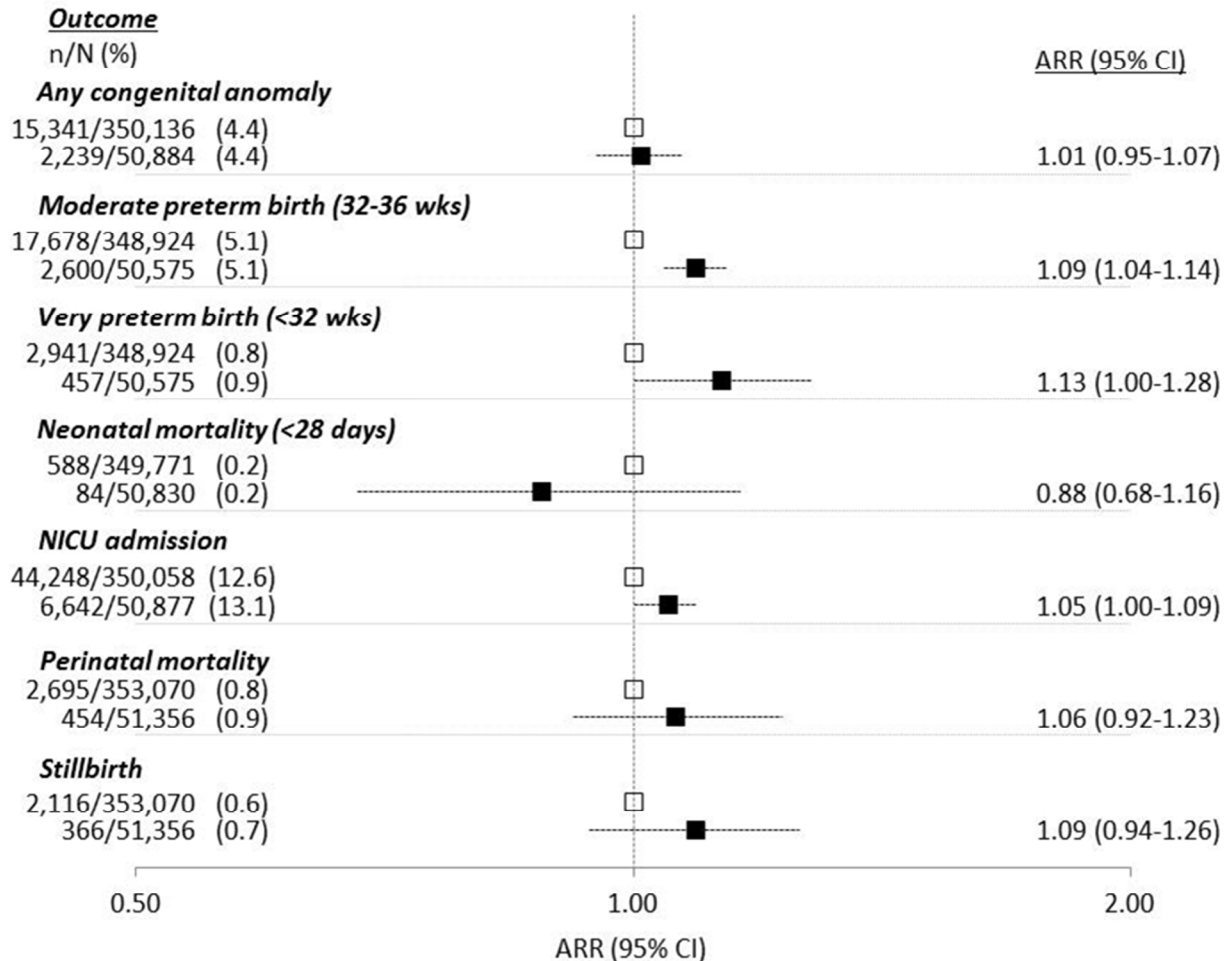

ARR – adjusted risk ratio; CI – confidence interval; NICU – neonatal intensive care unit

\*Estimated using log-binomial regression with generalized estimating equations to account for potential correlation among mothers from the same country of birth.

**STROBE 2007 (v4) Statement—Checklist of items that should be included in reports of *cohort studies***

| Section/Topic                | Item # | Recommendation                                                                                                                                                                       | Reported on page # |
|------------------------------|--------|--------------------------------------------------------------------------------------------------------------------------------------------------------------------------------------|--------------------|
| Title and abstract           | 1      | (a) Indicate the study's design with a commonly used term in the title or the abstract                                                                                               | 1                  |
|                              |        | (b) Provide in the abstract an informative and balanced summary of what was done and what was found                                                                                  | 2                  |
| <b>Introduction</b>          |        |                                                                                                                                                                                      |                    |
| Background/rationale         | 2      | Explain the scientific background and rationale for the investigation being reported                                                                                                 | 3                  |
| Objectives                   | 3      | State specific objectives, including any prespecified hypotheses                                                                                                                     | 3                  |
| <b>Methods</b>               |        |                                                                                                                                                                                      |                    |
| Study design                 | 4      | Present key elements of study design early in the paper                                                                                                                              | 3                  |
| Setting                      | 5      | Describe the setting, locations, and relevant dates, including periods of recruitment, exposure, follow-up, and data collection                                                      | 3-5                |
| Participants                 | 6      | (a) Give the eligibility criteria, and the sources and methods of selection of participants. Describe methods of follow-up                                                           | 3-4                |
|                              |        | (b) For matched studies, give matching criteria and number of exposed and unexposed                                                                                                  | 5                  |
| Variables                    | 7      | Clearly define all outcomes, exposures, predictors, potential confounders, and effect modifiers. Give diagnostic criteria, if applicable                                             | 4-5                |
| Data sources/<br>measurement | 8*     | For each variable of interest, give sources of data and details of methods of assessment (measurement). Describe comparability of assessment methods if there is more than one group | 4-5                |
| Bias                         | 9      | Describe any efforts to address potential sources of bias                                                                                                                            | 5                  |
| Study size                   | 10     | Explain how the study size was arrived at                                                                                                                                            | 5                  |
| Quantitative variables       | 11     | Explain how quantitative variables were handled in the analyses. If applicable, describe which groupings were chosen and why                                                         | 5                  |
| Statistical methods          | 12     | (a) Describe all statistical methods, including those used to control for confounding                                                                                                | 5                  |
|                              |        | (b) Describe any methods used to examine subgroups and interactions                                                                                                                  | 5                  |
|                              |        | (c) Explain how missing data were addressed                                                                                                                                          | 5                  |
|                              |        | (d) If applicable, explain how loss to follow-up was addressed                                                                                                                       | n/a                |
|                              |        | (e) Describe any sensitivity analyses                                                                                                                                                |                    |
| <b>Results</b>               |        |                                                                                                                                                                                      |                    |

|                          |     |                                                                                                                                                                                                              |                                                                                                     |
|--------------------------|-----|--------------------------------------------------------------------------------------------------------------------------------------------------------------------------------------------------------------|-----------------------------------------------------------------------------------------------------|
| Participants             | 13* | (a) Report numbers of individuals at each stage of study—eg numbers potentially eligible, examined for eligibility, confirmed eligible, included in the study, completing follow-up, and analysed            | n/a                                                                                                 |
|                          |     | (b) Give reasons for non-participation at each stage                                                                                                                                                         | n/a                                                                                                 |
|                          |     | (c) Consider use of a flow diagram                                                                                                                                                                           |                                                                                                     |
| Descriptive data         | 14* | (a) Give characteristics of study participants (eg demographic, clinical, social) and information on exposures and potential confounders                                                                     | Page 14- Table 1                                                                                    |
|                          |     | (b) Indicate number of participants with missing data for each variable of interest                                                                                                                          | Page 14- Table 1                                                                                    |
|                          |     | (c) Summarise follow-up time (eg, average and total amount)                                                                                                                                                  | n/a                                                                                                 |
| Outcome data             | 15* | Report numbers of outcome events or summary measures over time                                                                                                                                               | All figures                                                                                         |
| Main results             | 16  | (a) Give unadjusted estimates and, if applicable, confounder-adjusted estimates and their precision (eg, 95% confidence interval). Make clear which confounders were adjusted for and why they were included | Unadjusted figures in supplementary tables S2 and S3. Confounder adjusted estimates in all figures. |
|                          |     | (b) Report category boundaries when continuous variables were categorized                                                                                                                                    | Not applicable                                                                                      |
|                          |     | (c) If relevant, consider translating estimates of relative risk into absolute risk for a meaningful time period                                                                                             | Not relevant                                                                                        |
| Other analyses           | 17  | Report other analyses done—eg analyses of subgroups and interactions, and sensitivity analyses                                                                                                               | 6                                                                                                   |
| <b>Discussion</b>        |     |                                                                                                                                                                                                              |                                                                                                     |
| Key results              | 18  | Summarise key results with reference to study objectives                                                                                                                                                     | 6                                                                                                   |
| <b>Limitations</b>       |     |                                                                                                                                                                                                              |                                                                                                     |
| Interpretation           | 20  | Give a cautious overall interpretation of results considering objectives, limitations, multiplicity of analyses, results from similar studies, and other relevant evidence                                   | 6-8                                                                                                 |
| Generalisability         | 21  | Discuss the generalisability (external validity) of the study results                                                                                                                                        | 8                                                                                                   |
| <b>Other information</b> |     |                                                                                                                                                                                                              |                                                                                                     |
| Funding                  | 22  | Give the source of funding and the role of the funders for the present study and, if applicable, for the original study on which the present article is based                                                | 13                                                                                                  |

\*Give information separately for cases and controls in case-control studies and, if applicable, for exposed and unexposed groups in cohort and cross-sectional studies.

1  
2  
3  
4 **Note:** An Explanation and Elaboration article discusses each checklist item and gives methodological background and published examples of transparent reporting. The STROBE  
5 checklist is best used in conjunction with this article (freely available on the Web sites of PLoS Medicine at <http://www.plosmedicine.org/>, Annals of Internal Medicine at  
6 <http://www.annals.org/>, and Epidemiology at <http://www.epidem.com/>). Information on the STROBE Initiative is available at [www.strobe-statement.org](http://www.strobe-statement.org).  
7  
8  
9  
10  
11  
12  
13  
14  
15  
16  
17  
18  
19  
20  
21  
22  
23  
24  
25  
26  
27  
28  
29  
30  
31  
32  
33  
34  
35  
36  
37  
38  
39  
40  
41  
42  
43  
44  
45  
46  
47

For peer review only

# BMJ Open

## Refugee maternal and perinatal health in Ontario Canada: a retrospective population-based study

|                                 |                                                                                                                                                                                                                                                                                                                                                                                                                                                                                                                                                                                                                                                                                                                                                                                                                                                   |
|---------------------------------|---------------------------------------------------------------------------------------------------------------------------------------------------------------------------------------------------------------------------------------------------------------------------------------------------------------------------------------------------------------------------------------------------------------------------------------------------------------------------------------------------------------------------------------------------------------------------------------------------------------------------------------------------------------------------------------------------------------------------------------------------------------------------------------------------------------------------------------------------|
| Journal:                        | <i>BMJ Open</i>                                                                                                                                                                                                                                                                                                                                                                                                                                                                                                                                                                                                                                                                                                                                                                                                                                   |
| Manuscript ID                   | bmjopen-2017-018979.R1                                                                                                                                                                                                                                                                                                                                                                                                                                                                                                                                                                                                                                                                                                                                                                                                                            |
| Article Type:                   | Research                                                                                                                                                                                                                                                                                                                                                                                                                                                                                                                                                                                                                                                                                                                                                                                                                                          |
| Date Submitted by the Author:   | 04-Dec-2017                                                                                                                                                                                                                                                                                                                                                                                                                                                                                                                                                                                                                                                                                                                                                                                                                                       |
| Complete List of Authors:       | Wanigaratne, Susitha; St. Michael's Hospital, Centre for Urban Health Solutions; Institute for Clinical Evaluative Sciences<br>Shakya, Yogendra; 4. Access Alliance Multicultural Health and Community Services; University of Toronto, Dalla Lana School of Public Health<br>Gagnon, Anita; McGill University<br>Cole, Donald; University of Toronto, Dalla Lana School of Public Health<br>Rashid, Meb; Women's College Hospital<br>Blake, Jennifer; Society of Obstetricians and Gynaecologists of Canada<br>Dastoori, Parisa; St. Michael's Hospital<br>Moineddin, Rahim; University of Toronto, Family and Community Medicine<br>Ray, Joel; St. Michael's Hospital, Keenan Research Centre; University of Toronto, Departments of Medicine and Obstetrics and Gynaecology<br>Urquia, Marcelo; University of Manitoba; St. Michael's Hospital |
| <b>Primary Subject Heading</b>: | Public health                                                                                                                                                                                                                                                                                                                                                                                                                                                                                                                                                                                                                                                                                                                                                                                                                                     |
| Secondary Subject Heading:      | Epidemiology, Obstetrics and gynaecology                                                                                                                                                                                                                                                                                                                                                                                                                                                                                                                                                                                                                                                                                                                                                                                                          |
| Keywords:                       | EPIDEMIOLOGY, Maternal medicine < OBSTETRICS, PERINATOLOGY, PUBLIC HEALTH, SOCIAL MEDICINE                                                                                                                                                                                                                                                                                                                                                                                                                                                                                                                                                                                                                                                                                                                                                        |
|                                 |                                                                                                                                                                                                                                                                                                                                                                                                                                                                                                                                                                                                                                                                                                                                                                                                                                                   |

SCHOLARONE™  
Manuscripts

## Refugee maternal and perinatal health in Ontario Canada: a retrospective population-based study

Susitha Wanigaratne<sup>1,2</sup>, Yogendra Shakya<sup>3,4</sup>, Anita Gagnon<sup>5</sup>, Donald C. Cole<sup>4</sup>, Meb Rashid<sup>6</sup>, Jennifer Blake<sup>7</sup>, Parisa Dastoori<sup>1,3</sup>, Rahim Moineddin<sup>8</sup>, Joel G. Ray<sup>2,9,10</sup>, Marcelo L. Urquia<sup>1,2,4,11</sup>

<sup>1</sup> Centre for Urban Health Solutions, St. Michael's Hospital, Toronto, Ontario, Canada

<sup>2</sup> Institute for Clinical Evaluative Sciences, Sunnybrook Health Sciences Centre, Toronto, Ontario, Canada,

<sup>3</sup> Access Alliance Multicultural Health and Community Services, Toronto, Ontario, Canada,

<sup>4</sup> Dalla Lana School of Public Health, University of Toronto, Toronto, Ontario, Canada,

<sup>5</sup> Ingram School of Nursing, McGill University, Montreal, Quebec, Canada

<sup>6</sup> Crossroads Medical Clinic, Women's College Hospital, Toronto, Ontario, Canada,

<sup>7</sup> Society of Obstetricians and Gynaecologists of Canada, Ottawa, Ontario, Canada

<sup>8</sup> Department of Family and Community Medicine, University of Toronto, Toronto, Ontario, Canada,

<sup>9</sup> Keenan Research Centre, St. Michael's Hospital, Toronto, Ontario, Canada,

<sup>10</sup> Departments of Medicine and Obstetrics and Gynaecology, University of Toronto, Toronto, Ontario, Canada,

<sup>11</sup> Manitoba Centre for Health Policy, University of Manitoba, Winnipeg, Manitoba, Canada

Correspondence to

Dr. Susitha Wanigaratne; [wanigaratnes@smh.ca](mailto:wanigaratnes@smh.ca)



## Abstract

Objectives: Immigrants are thought to be healthier than their native-born counterparts, but less is known about the health of refugees or forced migrants. Previous studies often equate refugee status with immigration status or country of birth (COB) and none have compared refugee to non-refugee immigrants from the same COB. Herein, we examined whether: i) a refugee mother experiences greater risk of adverse maternal and perinatal health outcomes compared to a similar non-refugee mother from the same COB, and ii) refugee and non-refugee immigrants differ from Canadian-born mothers for maternal and perinatal outcomes.

Design: This is a retrospective population-based database study. We implemented two cohort designs: i) 1:1 matching of refugees to non-refugee immigrants on COB, year and age at arrival (+/- 5 years) and ii) an unmatched design using all data.

Setting and participants: Refugee immigrant mothers (N=34,233), non-refugee immigrant mothers (N=243,439) and Canadian-born mothers (N=615,394) eligible for universal health care insurance who had a hospital birth in Ontario, Canada between 2002 and 2014.

Primary outcomes: Numerous adverse maternal and perinatal health outcomes.

Results: Refugees differed from non-refugee immigrants most notably for HIV, with respective rates of 0.39% and 0.20% and an ARR of 1.51 (95% CI 1.07-2.11). Other elevated outcomes included gestational diabetes mellitus (ARR 1.07, 95% CI 1.00-1.14) caesarean section (ARR 1.03, 95% 1.00-1.05) and moderate preterm birth (ARR 1.06, 95% CI 0.99-1.15). For the majority of outcomes, refugee and non-refugee immigrants experienced similar ARRs when compared with Canadian-born mothers.

Conclusions: Refugee status was associated with a few adverse maternal and perinatal health outcomes but the associations were not strong except for HIV. The definition of refugee status used herein may not sensitively identify refugees at highest risk. Future research would benefit from further refining refugee status based on migration experiences.

### Strengths and limitations of this study

- This is a retrospective population-based cohort study from Ontario, Canada linking official permanent resident immigration, hospital and physician billing data to compare births between 2002 and 2014 from refugee mothers (N=34,233) to both non-refugee immigrant mothers (N=243,439) and Canadian-born mothers (N=615,394).
- This is the first study to match refugee immigrant to non-refugee immigrant mothers on country of birth, year and age at arrival; making it possible to explicitly determine whether refugee status confers greater risk of adverse outcomes among two otherwise very similar mothers.
- This is one of the largest studies of refugee maternal and perinatal health in the literature.
- The administrative definition of refugee status used in this study may not be sensitive enough to identify refugees with greater health risks or greater health care needs.

## Introduction

Refugees are considered an extremely vulnerable group for adverse health outcomes.[1] Canada, and other signatories to the United Nations (UN) Convention Relating to the Status of Refugees, define refugees as persons who fear persecution or violence because of their race, religion, nationality or political views and are forced to flee their home countries.[2] In Canada 10% of the 250,000 immigrants who become permanent residents each year are admitted as refugees.[3] Most non-refugee permanent residents are selected based on high levels of education, official language fluency, and work experience or is related to a permanent resident or Canadian citizen. This is in contrast to refugees who are either chosen based on vulnerability by the UN High Commissioner for Refugees (UNHCR) or, claim refugee status upon arrival and have the claim accepted by an independent tribunal.[4]

Given differing exposures in: countries of origin (e.g., conflict), transition countries (e.g., poor access to health services), post-migration exposures (e.g., discrimination); and receiving country immigration policies, the maternal and perinatal health of refugees may differ from their non-refugee immigrant counterparts.[5,6]

Few refugee maternal and perinatal health studies in Canada [5–8] or in other countries [9] compare refugees to non-refugee immigrants. Many studies use a native-born comparator and attribute excess risk to refugee status even though a non-refugee immigrant comparator is absent [10–15]. In addition, many studies rely on country of birth as an indicator of refugee migration [11–18] rather than identifying refugees based on their legal status or migration history. These details are critical, since specialized maternal and perinatal health care tailored to refugees cannot be effectively justified if a “refugee effect” cannot be differentiated from an “immigrant effect” or “country effect”. In addition, research often finds that immigrants are healthier than the native-born population, the so-called “healthy migrant effect”[19]. However, the effect may not apply to refugees given their differential exposure to health risks prior to arrival (as described above). Studies are mixed as to whether the healthy migrant effect applies to refugee maternal and perinatal health.[5,6,12]

Given this background our first objective was to determine whether a refugee immigrant mother experiences greater risk of adverse maternal and perinatal health outcomes compared to a similar non-refugee immigrant mother from the same country of birth. Secondary analyses focused on the top 5 refugee source countries (Sri Lanka, Somalia, Afghanistan, Iran, and China). Secondly, we compared maternal and perinatal health outcomes among refugee and non-refugee immigrant mothers to Canadian-born mothers to examine whether the health migrant effect applies to both refugee and non-refugee immigrants. This study used population-based administrative health care and immigration data from Ontario, the province which receives about half of all refugees arriving to Canada [3].

## Methods

### *Study Design and Inclusion/Exclusion Criteria*

This retrospective population-based database study included all Ontario hospital childbirth admissions occurring between April 1, 2002 and March 31, 2014. A matched cohort design was used to isolate the excess risk conferred by refugee status beyond that of immigration and country of birth, while a non-matched cohort design used all available data to compare outcomes of refugee and non-refugee immigrants to Canadian-born mothers. Births to refugee and non-refugee immigrant mothers were identified retrospectively through linkage of hospital admissions to the Immigration and Refugees Citizenship Canada Permanent Resident Database (IRCC-PRD). The cost of health care services was not a barrier to accessing care since all mothers were eligible for universal, publicly funded health care insurance. Births not linked to the IRCC PRD were attributed to *Canadian-born mothers* (Indigenous mothers could not be excluded at the time of the linkage). We reduced the bias attributed to unlinked migrant mothers among Canadian-born mothers by further restricting to mothers who: i) became

1  
2  
3 eligible for provincial health care insurance on or before 1990 (the first year insurance eligibility was  
4 recorded – those eligible prior to 1990 were given an eligibility start year of 1990) and less likely to be  
5 immigrants; ii) were born in an Ontario hospital after 1991 (the first year births were available in  
6 hospital data) or; iii) became eligible for provincial health care insurance within 1 year of their year of  
7 birth and therefore lived in Ontario from a very young age.

8  
9 For maternal outcomes, the unit of analysis was the delivery episode, where multiple births were  
10 counted as a single delivery. For all perinatal outcomes, the unit of analysis was restricted to singletons.  
11 Since many of the outcomes in this study are commonly used in epidemiologic surveillance,  
12 specifications based on gestational age and/or birthweight used by the Canadian Perinatal Surveillance  
13 System [20] were implemented where possible. These specifications relate to including births that are  
14 reasonably expected to be at risk for the outcome; births < 500 grams and/or <20 weeks gestation are  
15 less likely to be viable. The populations were as follows: for preterm birth (PTB) live births between 22-  
16 41 weeks gestational age (GA) and a birth weight (BWT) of  $\geq 500$  grams (g); neonatal intensive care  
17 (NICU) admission - live births with GA  $\geq 20$  weeks or a BWT  $\geq 500$  g; neonatal mortality - live births with a  
18 BWT  $\geq 500$  g; any congenital anomaly - stillbirths and live births with a GA  $\geq 20$  weeks or a BWT  $\geq 500$  g;  
19 stillbirth - GA  $\geq 20$  weeks or a BWT  $\geq 500$  g; perinatal mortality - stillbirths and live births with a GA  $\geq 20$   
20 weeks or a BWT  $\geq 500$  g.  
21  
22

### 23 Data Sources

24 We linked five administrative databases held at the Institute for Clinical and Evaluative Sciences  
25 (ICES) in Toronto, Ontario. These datasets were linked using unique encoded identifiers (i.e., encrypted  
26 health care number) and analyzed at ICES.  
27

28 The Immigration and Refugees Citizenship Canada Permanent Resident Database (IRCC-PRD) is  
29 administered by the Canadian government and used for legal purposes. The Ontario portion of this  
30 dataset contains information on all international migrants successful in obtaining permanent residency  
31 between 1985 and 2012. The IRCC-PRD contained <1% of missing values for all variables. Linkage  
32 between the IRCC-PRD and Ontario's health care registry was necessary to assign each individual in the  
33 IRCC-PRD their unique encrypted health care number since this facilitated deterministic linkage to the  
34 health care databases used to identify outcomes of interest. Ontario's health care registry consists of all  
35 persons eligible for publicly funded health care insurance in the province of Ontario between April 1,  
36 1990 and March 31, 2014. The health care registry contains encrypted unique health care numbers and  
37 other personal identifiers. A detailed explanation of the process used to link the IRCC-PRD and Ontario's  
38 health care registry can be found elsewhere [21]. In summary, deterministic linkage was undertaken first  
39 using several personal identifiers (i.e., sex, last name, given name, birth date) resulting in a 68.2%  
40 deterministic linkage rate. Unmatched records were then submitted to a probabilistic and manual  
41 review process which resulted in an additional 18.2% of records being linked (13.6% remained unlinked).  
42 Bias in the linkage process was investigated by comparing immigration variables between matched and  
43 unmatched individuals and little was detected.[21]  
44  
45

46 Childbirth records were obtained from the Discharge Abstract Database originating from the  
47 Canadian Institute of Health Information. Diagnosis and procedure codes using the 10th revision of the  
48 *International Statistical Classification of Diseases and Related Health Problems*, Canadian enhancement,  
49 and *Canadian Classification of Health Interventions* (ICD-10-CA/CCI) identified women with all maternal  
50 or perinatal outcomes except early neonatal and neonatal mortality. A validation study supported the  
51 use of this database for perinatal research.[22] This dataset also contains information on maternal age  
52 at the time of delivery, self-reported parity and birth plurality.  
53

54 The Office of the Registrar General's Vital Statistics-Death registry was used to identify early  
55 neonatal mortality (0-7 days of life) and neonatal mortality (0-28 days of life) between 2002 and 2012.  
56 96.2% of records in the Vital Statistics Registry were successfully linked to the health care registry and  
57

1  
2  
3 little bias in the linkage was detected.[21] However, individuals between the ages of 0 and 14 years  
4 were more likely to be unlinked. Vital Statistics data were supplemented by mortality recorded in the  
5 health care registry and other administrative health care databases, however early neonatal deaths may  
6 also be missing in the health care registry because health care numbers may not have been issued.[21]

7 The Ontario HIV Database (1992-2014) uses an algorithm consisting of at least three physician HIV  
8 diagnoses in a 3-year period to identify HIV positive persons. The algorithm demonstrated 96.2%  
9 sensitivity and 99.6% specificity when compared to patient charts.[23] HIV diagnoses were restricted to  
10 women diagnosed prior to child birth.  
11

### 12 13 *Variables*

14 Refugee status was defined using the IRCC-PRD. There are four categories of refugees in the  
15 database – i) government sponsored refugees, who are provided with financial and settlement  
16 assistance during their 1st year in Canada by the federal government; ii) privately sponsored refugees,  
17 who are provided with financial and settlement assistance during their 1<sup>st</sup> year in Canada by a group of  
18 Canadians; iii) refugee claimants, who arrive to Canada unsupported and make a legal claim to refugee  
19 status; and iv) refugees who are dependents of a primary refugee applicant. Prior to arrival, the two  
20 groups of sponsored refugees were registered with the UN High Commissioner for Refugees (UNHCR)  
21 and are chosen for immigration to Canada based on vulnerability. Sponsored refugees become  
22 permanent residents and are eligible for provincial health care upon arrival to Canada. Non-sponsored  
23 refugees (i.e., refugee claimants) [4,24] are eligible for federally funded health care (administered by the  
24 provinces) while they wait for their refugee determination hearing. The proportion of refugee claims  
25 approved during the time span of the IRCC-PRD is unknown but recent data indicate approvals have  
26 risen from 38.1% in 2013 to 66.1% in 2016 [25]. Successful refugee claimants, who make up the  
27 remaining 50% of permanent residents who are refugees, become eligible for permanent residency and  
28 for provincial health care once their claim is approved. Unsuccessful refugee claimants are not included  
29 in the IRCC-PRD.  
30

31 Non-refugee immigrants in the IRCC-PRD are predominately skilled immigrants or their family  
32 members. Skilled immigrants are selected based on high levels of education, official language fluency,  
33 and work experience. Family class immigrants must be related to a permanent resident or Canadian  
34 citizen able to provide financial support. Soon after arrival in Canada both groups become permanent  
35 residents and are eligible for universal, provincially funded health care.  
36

37 All immigrants in the IRCC-PRD were subject to an immigration medical exam (IME) during the  
38 application process. Prior to 2002 immigration applicants could be rejected if they placed “excessive  
39 demand” on health and social services [26]. However, in 2002 the Immigration & Refugee Protection Act  
40 (IRPA) [27] came into effect which changed this “excessive demand” criteria so it only applied to skilled  
41 immigrants and not family class immigrants or refugees.  
42

43 Canadian-born women are described above (under “Study Design and Inclusion/Exclusion Criteria”).  
44

45 We examined several maternal and perinatal health outcomes (see Supplementary Table S1 for  
46 codes). Severe maternal morbidity (SMM), was evaluated using a composite surveillance indicator  
47 [28,29] developed by the Canadian Perinatal Health Surveillance System. A woman had SMM if she had  
48 one or more of forty-five ICD-10-CA/CCI diagnoses or procedures reported during hospital admission for  
49 labour or delivery.[28] Other maternal health outcomes, documented at the time of delivery, were:  
50 complicated urinary tract infection (UTI), pre-existing hypertension, gestational hypertension,  
51 preeclampsia, eclampsia, pre-pregnancy diabetes, gestational diabetes mellitus (GDM), caesarean  
52 section, post-partum hemorrhage (PPH) and maternal intensive care unit (ICU) admission. Perinatal  
53 outcomes, documented at birth, included: any congenital anomaly, moderate preterm birth (moderate  
54 PTB) (32-36 weeks gestation), very preterm birth (very PTB) (< 32 weeks gestation), neonatal ICU (NICU)  
55 admission and stillbirth. Measurement of early neonatal mortality (0-7 days of life) and neonatal  
56

1  
2  
3 mortality (0-28 days of life) were not restricted to the hospital delivery admission. Information from  
4 both the ORGD and the RPDB were combined to identify early neonatal and neonatal mortality. Early  
5 neonatal mortality was combined with information on stillbirth to identify perinatal mortality.

6 Potential confounders were identified *a priori*. Some control variables were available for all births,  
7 including maternal age at delivery (15-19, 20-24, 25-29, 30-34, 35-39, 40+ years), neighborhood income  
8 quintile, parity (0, 1, 2 or  $\geq 3$  previous births) and plurality. Other control variables were only available  
9 for refugees and non-refugee immigrants since this information was collected in the IRCC-PRD. These  
10 included: maternal country of birth (COB); COBs categorized into world regions and sub-regions  
11 according to the UN classification system with a modification to the developed countries classification  
12 [30]; year of arrival (5-year categories); age at arrival (5-year categories); maternal education at arrival  
13 (0-9 years, 10-12 years, 13+ years, trade certificate/non-university diploma, University degree);  
14 knowledge of official Canadian languages at arrival (English and/or French or neither); and duration of  
15 residence in Canada, defined as the time (in years) elapsed between the date of becoming a permanent  
16 resident and the date of delivery.

### 19 Analysis

20 Births with missing data for any control variable were excluded. To estimate whether refugee  
21 status increases the risk of adverse outcomes between a refugee mother and a non-refugee mother  
22 with a similar pre-migration circumstances (objective 1), we 1:1 matched first births in Canada among  
23 refugees to non-refugee immigrants on COB, year of arrival (+/- 5 years) and age at arrival (+/- 5 years).  
24 Analyses were restricted to the first delivery in the hospitalization database to prevent matching several  
25 births from a single refugee mother to births to more than one non-refugee immigrant mother. With  
26 this matched cohort design, estimating risk ratios is preferred over odds ratios since it is more  
27 appropriate to model the risk in a cohort study and because risk ratios do not exaggerate relative risks  
28 for common outcomes (which odds ratios tend to do). For these reasons we opted to use log-binomial  
29 regression instead of conditional logistic regression which estimates odds ratios. In addition, to compare  
30 refugee and non-refugee immigrants within pairs (or clusters) we used fixed-effects Generalized  
31 Estimating Equations (GEE) with an exchangeable correlation matrix.[31] This was deemed an  
32 acceptable approach since analysis of clustered data using conditional logistic regression and logistic  
33 regression with GEE was shown to provide similar estimates and standard errors.[32]

34 Models were adjusted for maternal age at delivery, parity, neighborhood income, education at  
35 arrival, knowledge of official languages at arrival and duration of residence in Canada. In secondary  
36 analyses focusing on refugee and non-refugee immigrants from the top 5 refugee source countries of  
37 birth, all births were included and analyzed with log-binomial regression. Non-independence of the  
38 outcome among births to the same mother was accounted for with GEE.

39 To compare refugee and non-refugee mothers to Canadian-born mothers all births were included  
40 and log-binomial regression with GEE was used to account for non-independence of the outcome among  
41 births from the same mother. Fewer variables were available for Canadian-born women so models were  
42 adjusted for maternal age at delivery, parity and neighborhood income.

### 47 Research Ethics

48 This study was approved by the institutional review board at Sunnybrook Health Sciences  
49 Centre, and the ethics review board of St. Michael's Hospital, Toronto, Canada.

### 52 Results

53 Table 1 summarizes the characteristics of refugee immigrant mothers (N=34,233), non-refugee  
54 immigrant mothers (N=243,439) and Canadian-born mothers (N=615,394). Refugee mothers had 52,360  
55 births in Ontario, non-refugee immigrant mothers had 360,007 births and Canadian mothers had  
56

1  
2  
3 977,045 births. More refugee mothers (10%) had high parity ( $\geq 3$  previous births) compared to both non-  
4 refugee immigrant (3.2%) and Canadian-born mothers (2.7%) at the first birth in Ontario. A greater  
5 proportion of refugees had less than 13 years of education at arrival (72.6%) compared to non-refugee  
6 immigrants (43.0%). There were about 5 times as many refugee mothers from Sub-Saharan Africa  
7 compared to non-refugee immigrant mothers (22.8% and 4.8%, respectively).

8  
9 Eighty-five percent of refugee mothers (N= 29,023) were successfully matched to a non-refugee  
10 mother on country of birth, and year and age at arrival (+/- 5 years). For most outcomes, differences  
11 between matched refugees and non-refugees were non-significant (see Figures 1 and 2). GDM  
12 (ARR=1.07 95% CI 1.00-1.14), caesarean section (ARR=1.03 95% CI 1.00-1.05) and HIV (ARR=1.51 95% CI  
13 1.07-2.11) were significantly higher among refugees. Moderate PTB approached statistical significance  
14 (ARR=1.06, 95% CI 0.99-1.15). See Supplementary Table S2 for unadjusted results.

15  
16 Supplementary Figures (S1a/b through S5a/5b) disaggregate results according to the top 5  
17 refugee source countries to Ontario— Sri Lanka, Somalia, Afghanistan, Iraq and China. Afghan and Iraqi  
18 refugees had higher risk of caesarean section while Sri Lankan and Somali refugees experienced higher  
19 risk of MPTB compared to their same-country non-refugee counterparts.

20  
21 Figures 3 and 4 compare both refugees to Canadian-born mothers and non-refugee immigrants  
22 to Canadian-born mothers. Other than severe maternal morbidity (SMM) and HIV, the two sets of ARRs  
23 comparing refugees to Canadian-born mothers and non-refugees to Canadian-born mothers were in the  
24 same direction and of a similar magnitude. With respect to SMM (Figure 3), refugees had a significantly  
25 higher rate compared to Canadian-born mothers while non-refugee immigrant mothers had a  
26 significantly lower rate. However, after HIV was removed from the SMM index refugees experienced a  
27 similar rate of SMM to Canadian-born mothers. For other maternal outcomes (Figure 3), both refugees  
28 and non-refugees compared to Canadian-born mothers had: *significantly lower risk* of complicated UTI,  
29 pre-existing hypertension, gestational hypertension, preeclampsia, eclampsia, pre-pregnancy diabetes,  
30 and PPH; and *significantly higher risk* of caesarean section, GDM, maternal ICU admission and HIV. In  
31 terms of perinatal outcomes (Figure 4), both refugees and non-refugees compared to Canadian-born  
32 mothers had: *significantly lower risk* of any congenital anomaly and moderate PTB; similar risk of very  
33 PTB and neonatal mortality; and *significantly higher risk* of NICU admission, perinatal mortality and  
34 stillbirth. See Supplementary Table S3 for unadjusted results.

## 35 36 37 Discussion

38 We found modest increased risks of gestational diabetes, cesarean section and moderate PTB  
39 among refugee compared to non-refugee mothers from the same COB. HIV was the exception with a  
40 much greater prevalence. Overall, our findings suggest that refugee status, measured with an  
41 administrative definition, is not a strong risk indicator for poor maternal and perinatal health. In  
42 addition, we found that refugee and non-refugee mothers experienced a similar magnitude of relative  
43 risk for almost all outcomes when each group was separately compared to Canadian-born mothers.  
44 About one third of outcomes were significantly worse among refugee and non-refugee immigrant  
45 mothers when compared to Canadian-born mothers.

46  
47 The findings on SMM and HIV are explained in detail in a previous report of ours [5] (although  
48 unmatched on country of birth). Our current results are consistent with the previous study however  
49 with smaller HIV prevalence ratios. The smaller prevalence ratio can likely be explained by the different  
50 method used to capture HIV diagnoses (hospital discharge data in the previous study and HIV physician  
51 diagnoses data in the current study) but also because 1:1 matching of refugee to non-refugee  
52 immigrants on country of birth, year and age at arrival in the current study accounted for some of the  
53 difference between refugee and non-refugee immigrants. In our previous work we found that refugee  
54 mothers with HIV did not have any greater maternal morbidity compared to non-refugee immigrant or  
55 Canadian-born mothers with HIV, suggesting that HIV during pregnancy is well-managed in Ontario

1  
2  
3 regardless of refugee status (with permanent residency). In contrast, a Dutch study [9] describes HIV as  
4 a risk indicator for severe acute maternal morbidity among asylum-seekers (refugees without  
5 permanent residency); suggesting that a lack of appropriate HIV care may be contributing to SAMM.

6  
7 Refugee mothers were 3% more likely to have a caesarean section compared their non-refugee  
8 counterparts while Afghan and Iraqi refugee mothers were ~20% more likely to experience caesarean  
9 section than their same-country non-refugee counterparts. A study involving 10 Canadian hospitals [33]  
10 found a significant difference between refugee, asylum-seeker and non-refugee immigrants from South-  
11 East and Central Asia. Reasons for the higher caesarean rate among refugees were: higher parity,  
12 medical complications, low socio-economic status, socio-cultural factors and sub-optimal perinatal  
13 care.[33]

14  
15 Refugee status was also positively associated with gestational diabetes and moderate PTB. Sri  
16 Lankan and Somali refugees had a greater risk of moderate PTB. The relationship between refugee  
17 status and gestational diabetes may be explained by a study which found stressful events were  
18 associated with 2.5 times greater risk of gestational diabetes.[34] Other research suggests maternal  
19 chronic stress is an important risk factor for PTB,[35] particularly among socially disadvantaged  
20 populations.[36] Previously published research of ours found that the effect of refugee status on PTB  
21 was stronger among refugee mothers who resided in a transition country prior to arriving in Canada [7]  
22 with potentially greater exposure to psychosocial stress. The hypothesized physiological mechanism  
23 connecting psychosocial stress to both gestational diabetes and PTB involves dysfunction of regulatory  
24 hormones in the body - insulin resistance or impaired insulin metabolism leading to gestational diabetes  
25 [34] and early release of hormones required for the initiation of labour leading to PTB.[35]

26  
27 The extent to which refugee and non-refugee immigrants experienced the “healthy migrant  
28 effect” (HME) (relative to Canadian-born mothers) for all maternal and perinatal health outcomes was  
29 identical. We found that both refugee and non-refugee immigrants experienced higher risk of the same  
30 adverse maternal and perinatal health outcomes (1/3 of all outcomes examined) compared to Canadian-  
31 born mothers. This suggests that refugee status, using an administrative definition of refugees, is not an  
32 important factor in the HME for these outcomes. These findings are also consistent with others who  
33 have stated that the HME is not evident for all health outcomes.[37]

### 34 35 36 *Strengths and Limitations*

37  
38 Among studies examining refugee maternal and perinatal health [5–18,38–49], our study has  
39 several unique and important strengths. Firstly, our study used official government immigration data to  
40 identify women who met the UNHCR definition of a refugee rather than relying on country of birth  
41 (COB) as an indicator of refugee status, as many previous studies have done.[11–18] Secondly, we  
42 matched refugee and non-refugee immigrant women on country of birth, as well as year and age at  
43 arrival (see Supplementary Figures S6 & S7 for unmatched results). By matching on these variables, ours  
44 is the first study to effectively address the question of whether refugee status among two otherwise  
45 similar immigrant mothers, is a risk indicator for adverse maternal and perinatal outcomes. Thirdly, to  
46 our knowledge our study includes the largest sample of mothers legally classified as refugees reported  
47 in the literature contributing to adequate statistical power for our main analyses (objectives 1 and 2).

48  
49 This study is not without limitations. In our main analysis, we matched 85% of refugee mothers  
50 to one non-refugee immigrant mother. To ensure that the results of the matched sample were not  
51 biased, a sensitivity analysis was conducted where the refugees and non-refugees unmatched on  
52 country of birth were matched instead by sub-region of birth (e.g., East Africa) as well as year and age at  
53 arrival. With this second round of matching, 99% of all refugee mothers were matched to a non-refugee  
54 mother either on country or sub-region of birth. Analysis of this twice-matched cohort yielded very  
55 similar risk ratios to those of the first match. Given that the results were similar, and that the first match

1  
2  
3 most effectively tells us whether refugee status among immigrant mothers with a similar pre-migration  
4 context increases risk of adverse outcomes, we chose to present results from only the first match.

5 Other limitations are as follows. Firstly, the “refugee experience” as it pertains to health risks  
6 may not be consistent with the legally applied definition of “refugee”. Risk factors for adverse outcomes  
7 (i.e., exposure to violence, forced family separation) are context dependent, such as the length of time  
8 in the migration phase and access to health and other supportive services before and during migration -  
9 factors for which we did not have data. We addressed context by matching refugees to non-refugees on  
10 COB, year and age at arrival as well as restricting analyses to the top 5 refugee-source countries; however  
11 even within these COBs there is likely important heterogeneity which we could not examine or account  
12 for. A second limitation is the inability to categorize family class non-refugee immigrants according to  
13 the permanent residency status of the sponsoring family member (i.e., economic or refugee). This may  
14 have caused some refugees to be misclassified as non-refugee immigrants and contributed to biasing  
15 estimates in Figures 1 and 2 towards the null. However, since refugees are less likely to have the  
16 financial means necessary for sponsorship, the number of family class members who may be refugees is  
17 not likely to substantially affect risk estimates. A third limitation may be that estimates in Figures 1 and  
18 2 were over-adjusted given that the majority of non-refugee permanent residents are selected based on  
19 their education and official language ability. However, unadjusted estimates (see Supplementary Table  
20 S2) demonstrate that adjusting for these variables does not substantially affect our conclusions. A fourth  
21 limitation is that we lacked data on body mass index. Finally, our findings are not generalizable to  
22 *unsuccessful* refugee claimants (since our study was limited to permanent residents) who may be more  
23 representative of refugees and asylum seekers in other countries.  
24  
25  
26

### 27 *Implications*

28 To help understand modest differences in gestational diabetes and moderate PTB between  
29 refugee and non-refugee immigrant women, further research into stressors refugee mothers experience  
30 in their countries of origin, in transition countries and in countries of re-settlement may help support  
31 development of preconception and pregnancy stress prevention and management strategies.  
32

33 Research has described that refugees and other immigrants in Canada experience barriers to  
34 accessing health care[50], had unaddressed health concerns after birth [51] and experienced culturally  
35 insensitive policies [50]. Indeed, such health care deficiencies may have contributed to the 1/3<sup>rd</sup> of  
36 outcomes where refugee and non-refugee immigrant mothers experienced greater risk when compared  
37 to Canadian-born mothers. By the same token, it is surprising that refugee mothers did not experience  
38 an excess of maternal and infant health risks compared to non-refugee immigrants since these health  
39 care deficiencies are likely experienced more acutely by refugee mothers.  
40

41 There are a few important caveats to our findings. Firstly, and perhaps most importantly, the  
42 administrative definition of refugees is broad and is perhaps unable to sensitively identify refugees at  
43 highest health risk. Secondly, non-refugee immigrants from refugee-source countries may be just as  
44 likely to experience pre-departure health risks (related to persecution) as their refugee counterparts,  
45 reducing specificity and minimizing any differences between the groups. Thirdly, all permanent resident  
46 refugees to Canada receive financial and social supports (e.g., housing, resettlement), particularly in the  
47 first year after arrival as well as universal health care (as described in the method section). Specialized  
48 primary health care centres catering to the unique health needs of refugees are available [52,53]. There  
49 are also national efforts to highlight the need for a focus on equity in the quality of care received and  
50 migrant friendly maternity care [54]. These specialized health and social support efforts may be helping  
51 to minimize potential health inequities experienced by refugees. Lastly, despite official immigration  
52 policies, such as the Immigration & Refugee Protection Act (IRPA, 2002)[26,27] (see methods section for  
53 more detail), it is possible that unofficial processes select refugees based on factors such as skill level  
54 and language fluency (i.e., similar to non-refugee immigrants), effectively selecting for healthy refugees.  
55  
56  
57



1  
2  
3  
4 *Future Research*

5       Refugees should be compared to non-refugee immigrants, preferably from the same country of  
6 birth, as this more effectively addresses the question of whether refugees, among all migrants, are at  
7 increased risk for poor health. Further refining refugee status based on detailed migration experiences  
8 would also be beneficial. Finally, to help facilitate international comparisons, refugee health researchers  
9 may find it useful to state if and how immigration policies shape the health of refugees relative to other  
10 immigrants within their borders.  
11  
12  
13  
14  
15  
16  
17  
18  
19  
20  
21  
22  
23  
24  
25  
26  
27  
28  
29  
30  
31  
32  
33  
34  
35  
36  
37  
38  
39  
40  
41  
42  
43  
44  
45  
46  
47  
48  
49  
50  
51  
52  
53  
54  
55  
56  
57

## References

- 1 Gagnon AJ, Merry L, Robinson C. A systematic review of refugee women's reproductive health. *Refuge* 2002.
- 2 Citizenship and Immigration Canada. Guide 6000 - Convention Refugees Abroad and Humanitarian-Protected Persons Abroad. 2017. <http://www.cic.gc.ca/English/information/applications/guides/E16000TOC.asp> (accessed 1 May 2017).
- 3 Immigration, Refugees & Citizenship Canada. Facts & Figures 2015: Immigration Overview - Permanent Residents – Annual IRCC Updates. Canada - Permanent residents by province or territory and category. 2015. [http://www.cic.gc.ca/opendata-donneesouvertes/data/IRCC\\_FFPR\\_17\\_F.xls](http://www.cic.gc.ca/opendata-donneesouvertes/data/IRCC_FFPR_17_F.xls) (accessed 11 May 2017).
- 4 Settlement.org. How does Canada's refugee system work? 2017. <http://settlement.org/ontario/immigration-citizenship/refugees/basic-information-for-refugees/how-does-canada-s-refugee-system-work/> (accessed 1 May 2017).
- 5 Wanigaratne S, Cole DC, Bassil K, *et al.* Contribution of HIV to Maternal Morbidity Among Refugee Women in Canada. *Am J Public Health* 2015;**105**:2449–56. doi:10.2105/AJPH.2015.302886
- 6 Wanigaratne S, Cole DC, Bassil K, *et al.* Severe Neonatal Morbidity Among Births to Refugee Women. *Matern Child Health J* 2016;**20**:2189–98. doi:10.1007/s10995-016-2047-4
- 7 Wanigaratne S, Cole DC, Bassil K, *et al.* The influence of refugee status and secondary migration on preterm birth. *J Epidemiol Community Health* 2016;**70**:622–8. doi:10.1136/jech-2015-206529
- 8 Vigod SN, Bagadia AJ, Hussain-Shamsy N, *et al.* Postpartum mental health of immigrant mothers by region of origin, time since immigration, and refugee status: a population-based study. *Arch Womens Ment Health*; **20**:439–47. doi:10.1007/s00737-017-0721-1
- 9 Van Hanegem N, Miltenburg AS, Zwart JJ, *et al.* Severe acute maternal morbidity in asylum seekers: a two-year nationwide cohort study in the Netherlands. *Acta Obstet Gynecol Scand* 2011;**90**:1010–6.
- 10 Gagnon AJ, Dougherty G, Wahoush O, *et al.* International migration to Canada: The post-birth health of mothers and infants by immigration class. *Soc Sci Med* 2012;**76**:197–207.
- 11 Vangen S, Stoltenberg C, Johansen REB, *et al.* Perinatal complications among ethnic Somalis in Norway. *Acta Obstet Gynecol Scand* 2002;**81**:317–22.
- 12 Essen B, Hanson BS, Ostergren PO, *et al.* Increased perinatal mortality among sub-Saharan immigrants in a city-population in Sweden. *Acta Obstet Gynecol Scand* 2000;**79**:737–43.
- 13 Belihu FB, Davey M-A, Small R. Perinatal health outcomes of East African immigrant populations in Victoria, Australia: a population based study. *BMC Pregnancy Childbirth* 2016;**16**. doi:10.1186/s12884-016-0886-z

- 1  
2  
3 14 Bakken KS, Skjeldal OH, Stray-Pedersen B. Immigrants from conflict-zone countries: an observational  
4 comparison study of obstetric outcomes in a low-risk maternity ward in Norway. *BMC Pregnancy*  
5 *Childbirth* 2015;**15**. doi:10.1186/s12884-015-0603-3  
6  
7 15 Miller LS, Robinson JA, Cibula DA. Healthy Immigrant Effect: Preterm Births Among Immigrants and  
8 Refugees in Syracuse, NY. *Matern Child Health J* 2016;**20**:484–93. doi:10.1007/s10995-015-1846-3  
9  
10 16 Gibson-Helm M, Teede H, Block A, *et al*. Maternal health and pregnancy outcomes among women  
11 of refugee background from African countries: a retrospective, observational study in Australia.  
12 *BMC Pregnancy Childbirth* 2014;**14**:392.  
13  
14 17 Gibson-Helm M, Boyle J, Cheng I-H, *et al*. Maternal health and pregnancy outcomes among women  
15 of refugee background from Asian countries. *Int J Gynecol Obstet* 2015;**129**:146–51.  
16 doi:10.1016/j.ijgo.2014.10.036  
17  
18 18 Gibson-Helm M, Teede H, Cheng I-H, *et al*. Maternal health and pregnancy outcomes comparing  
19 migrant women born in humanitarian and nonhumanitarian source countries: a retrospective,  
20 observational study. *Birth* 2015;**42**:116–24.  
21  
22 19 Urquia ML, Gagnon AJ. Glossary: migration and health. *J Epidemiol Community Health* 2011;**65**:467–  
23 472.  
24  
25 20 Public Health Agency of Canada. Perinatal Health Indicators for Canada - 2011. 2011.  
26 <http://www.phac-aspc.gc.ca/rhs-ssg/phi-isp-2011-eng.php> (accessed 15 Aug 2013).  
27  
28 21 Chiu M, Lebenbaum M, Lam K, *et al*. Describing the linkages of the immigration, refugees and  
29 citizenship Canada permanent resident data and vital statistics death registry to Ontario's  
30 administrative health database. *BMC Med Inform Decis Mak* 2016;**16**. doi:10.1186/s12911-016-  
31 0375-3  
32  
33 22 Joseph KS, Fahey J. Validation of perinatal data in the Discharge Abstract Database of the Canadian  
34 Institute for Health Information. *Chronic Dis Can* 2009;**29**:96–100.  
35  
36 23 Antoniou T, Zagorski B, Loutfy MR, *et al*. Validation of Case-Finding Algorithms Derived from  
37 Administrative Data for Identifying Adults Living with Human Immunodeficiency Virus Infection.  
38 *PLoS ONE* 2011;**6**:e21748. doi:10.1371/journal.pone.0021748  
39  
40 24 Keung N. The law says refugee claims must be heard in 60 days. So why are people waiting 16  
41 months? *Tor. Star*. 2017. [https://www.thestar.com/news/immigration/2017/09/20/the-law-says-](https://www.thestar.com/news/immigration/2017/09/20/the-law-says-refugee-claims-must-be-heard-in-60-days-so-why-are-asylum-seekers-waiting-16-months.html)  
42 [refugee-claims-must-be-heard-in-60-days-so-why-are-asylum-seekers-waiting-16-months.html](https://www.thestar.com/news/immigration/2017/09/20/the-law-says-refugee-claims-must-be-heard-in-60-days-so-why-are-asylum-seekers-waiting-16-months.html)  
43 (accessed 19 Nov 2017).  
44  
45 25 Keung N. Canada's refugee acceptance rate peaked in four years. *Tor. Star*.  
46 2017. [https://www.thestar.com/news/immigration/2017/03/07/canadas-refugee-acceptance-rate-](https://www.thestar.com/news/immigration/2017/03/07/canadas-refugee-acceptance-rate-peaked-in-four-years.html)  
47 [peaked-in-four-years.html](https://www.thestar.com/news/immigration/2017/03/07/canadas-refugee-acceptance-rate-peaked-in-four-years.html) (accessed 19 Nov 2017).  
48  
49 26 Immigration, Refugees & Citizenship Canada. Excessive demand on health and social services.  
50 2016. <http://www.cic.gc.ca/english/resources/tools/medic/admiss/excessive.asp> (accessed 1 May  
51 2017).  
52  
53  
54  
55  
56  
57  
58  
59  
60

- 1  
2  
3 27 Minister of Justice, Canada. Immigration and Refugee Protection Act S.C. 2001, c.27. 2016.  
4 <http://laws.justice.gc.ca/PDF/I-2.5.pdf> (accessed 19 Dec 2016).  
5  
6 28 Joseph KS, Liu S, Rouleau J, *et al.* Severe maternal morbidity in Canada, 2003 to 2007: surveillance  
7 using routine hospitalization data and ICD-10CA codes. *J Obstet Gynaecol Can* 2010;**32**:837–846.  
8  
9 29 Liu S, Joseph KS, Bartholomew S, *et al.* Temporal trends and regional variations in severe maternal  
10 morbidity in Canada, 2003 to 2007. *J Obstet Gynaecol Can* 2010;**32**:847–855.  
11  
12 30 United Nations Statistics Division. Composition of macro geographical (continental) regions,  
13 geographical sub-regions, and selected economic and other groups.  
14 2013.<http://unstats.un.org/unsd/methods/m49/m49regin.htm> (accessed 13 Oct 2016).  
15  
16 31 Alexander MT, Kufera JA. Butting heads on matched cohort analysis using SAS software. 2007.  
17 [https://www.researchgate.net/publication/228891709\\_Butting\\_heads\\_on\\_matched\\_cohort\\_analys](https://www.researchgate.net/publication/228891709_Butting_heads_on_matched_cohort_analysis_using_SASR_software)  
18 [is\\_using\\_SASR\\_software](https://www.researchgate.net/publication/228891709_Butting_heads_on_matched_cohort_analysis_using_SASR_software) (accessed 2 Nov 2017).  
19  
20 32 Ying G, Liu C. Statistical analysis of clustered data SAS System. 2006.  
21 [www.lexjansen.com/nesug/nesug06/an/da01.pdf](http://www.lexjansen.com/nesug/nesug06/an/da01.pdf) (accessed 17 Nov 2017).  
22  
23 33 Gagnon AJ, Van Hulst A, Merry L, *et al.* Cesarean section rate differences by migration indicators.  
24 *Arch Gynecol Obstet* 2013;**287**:633–9. doi:10.1007/s00404-012-2609-7  
25  
26 34 Hosler AS, Nayak SG, Radigan AM. Stressful events, smoking exposure and other maternal risk  
27 factors associated with gestational diabetes mellitus. *Paediatr Perinat Epidemiol* 2011;**25**:566–574.  
28  
29 35 Latendresse G. The interaction between chronic stress and pregnancy: preterm birth from a  
30 biobehavioral perspective. *J Midwifery Women's Health* 2009;**54**:8–17.  
31  
32 36 Wadhwa PD, Entringer S, Buss C, *et al.* The contribution of maternal stress to preterm birth: issues  
33 and considerations. *Clin Perinatol* 2011;**38**:351–84. doi:10.1016/j.clp.2011.06.007  
34  
35 37 Vang ZM, Sigouin J, Flenon A, *et al.* Are immigrants healthier than native-born Canadians? A  
36 systematic review of the healthy immigrant effect in Canada. *Ethn Health* 2017;**22**:209–41.  
37 doi:10.1080/13557858.2016.1246518  
38  
39 38 Goosen S, Hoebe CJ, Waldhober Q, *et al.* High HIV prevalence among asylum seekers who gave birth  
40 in the Netherlands: a nationwide study based on antenatal HIV tests. *PLoS One* 2015;**10**:e0134724.  
41  
42 39 Dennis C-L, Merry L, Stewart D, *et al.* Prevalence, continuation, and identification of postpartum  
43 depressive symptomatology among refugee, asylum-seeking, non-refugee immigrant, and  
44 Canadian-born women: results from a prospective cohort study. *Arch Womens Ment Health*  
45 2016;**19**:959–67. doi:10.1007/s00737-016-0633-5  
46  
47 40 Dennis C-L, Merry L, Gagnon AJ. Postpartum depression risk factors among recent refugee, asylum-  
48 seeking, non-refugee immigrant, and Canadian-born women: results from a prospective cohort  
49 study. *Soc Psychiatry Psychiatr Epidemiol* 2017;**52**:411–22. doi:10.1007/s00127-017-1353-5  
50  
51  
52  
53  
54  
55  
56  
57  
58  
59  
60

- 1  
2  
3 41 Gann P, Nghiem L, Warner S. Pregnancy characteristics and outcomes of Cambodian refugees. *Am J*  
4 *Public Health* 1989;**79**:1251–7.  
5  
6 42 Flynn PM, Foster EM, Brost BC. Indicators of acculturation related to Somali refugee women’s birth  
7 outcomes in Minnesota. *J Immigr Minor Health* 2011;**13**:224–231.  
8  
9 43 Kandasamy T, Berniak R, Shah R, *et al.* Obstetric Risks and Outcomes of Refugee Women at a Single  
10 Centre in Toronto. *J Obstet Gynaecol Can* 2014;**36**:296–302.  
11  
12 44 Davis JM, Goldenring J, McChesney M, *et al.* Pregnancy outcomes of Indochinese refugees, Santa  
13 Clara County, California. *Am J Public Health* 1982;**72**:742–4.  
14  
15 45 Lalchandani S, MacQuillan K, Sheil O. Obstetric profiles and pregnancy outcomes of immigrant  
16 women with refugee status. *Ir Med J* 2001;**94**:79–80.  
17  
18 46 King PA, Duthie SJ, Li DFH, *et al.* Obstetric outcome among Vietnamese refugees in Hong Kong: an  
19 age-matched case-controlled study. *Int J Gynaecol Obstet Off Organ Int Fed Gynaecol Obstet*  
20 1990;**33**:203–10.  
21  
22 47 Malamitsi-Puchner A, Tzala L, Minaretzis D, *et al.* Preterm delivery and low birthweight among  
23 refugees in Greece. *Paediatr Perinat Epidemiol* 1994;**8**:384–390.  
24  
25 48 Kuvacic I, Skrablin S, Hodzic D, *et al.* Possible influence of expatriation on perinatal outcome. *Acta*  
26 *Obstet Gynecol Scand* 1996;**75**:367–71.  
27  
28 49 Liu C, Urquia M, Cnattingius S, *et al.* Migration and preterm birth in war refugees: a Swedish cohort  
29 study. *Eur J Epidemiol* 2014;**29**:141–3. doi:10.1007/s10654-013-9877-9  
30  
31 50 Stewart M, Dennis CL, Kariwo M, *et al.* Challenges Faced by Refugee New Parents from Africa in  
32 Canada. *J Immigr Minor Health* 2015;**17**:1146–56. doi:10.1007/s10903-014-0062-3  
33  
34 51 Gagnon AJ, Dougherty G, Platt RW, *et al.* Refugee and refugee-claimant women and infants post-  
35 birth: migration histories as a predictor of Canadian health system response to needs. *Can J Public*  
36 *Health Rev Can Sante Publique* 2007;**98**:287–91.  
37  
38 52 Women’s College Hospital. Crossroads Clinic. [http://www.womenscollegetherospital.ca/programs-and-](http://www.womenscollegetherospital.ca/programs-and-services/crossroads-clinic/)  
39 [services/crossroads-clinic/](http://www.womenscollegetherospital.ca/programs-and-services/crossroads-clinic/) (accessed 21 Jul 2017).  
40  
41 53 Access Alliance Multicultural Health and Community Services. <http://accessalliance.ca/> (accessed 21  
42 Jul 2017).  
43  
44 54 Gagnon AJ, DeBruyn R, Essén B, *et al.* Development of the Migrant Friendly Maternity Care  
45 Questionnaire (MFMQC) for migrants to Western societies: an international Delphi consensus  
46 process. *BMC Pregnancy Childbirth* 2014;**14**:200.  
47  
48  
49  
50  
51  
52  
53  
54  
55  
56  
57  
58  
59  
60

1  
2  
3 **Contributors:** SW (1),YS (2), AG (3), DCC (4), MR (5), JB (6), PD (7), RM (8), JGR (9), MLU (10).

4 SW (1) conceived the research questions, designed the study, conducted statistical analysis, interpreted  
5 the results and wrote the first and subsequent drafts of the manuscript. RM (8), JGR (9) and MLU (10)  
6 contributed to the research design and data analysis. YS (2), AG (3), DCC (4), MR (5), JB (6), PD (7), RM  
7 (8), JGR (9) and MLU (10) contributed to data interpretation and revisions of the manuscript. MLU (10)  
8 and JGR (9) obtained funding. All authors approved the final version of the submitted manuscript.  
9

10  
11 **Funding:** This study was funded by a grant from the Canadian Institutes of Health Research (CIHR) (MOP  
12 137110). SW is supported by a post-doctoral fellowship funded from this grant. MLU holds a Canada  
13 Research Chair in Applied Population Health. JGR holds a CIHR Chair in Reproductive, Child and Youth  
14 Health Services and Policy Research.  
15

16  
17 **Competing Interests:** All authors have completed the ICMJE uniform disclosure form at  
18 [www.icmje.org/coi\\_disclosure.pdf](http://www.icmje.org/coi_disclosure.pdf) and declare: no support from any organisation for the submitted  
19 work; no financial relationships with any organisations that might have an interest in the submitted  
20 work in the previous three years; no other relationships or activities that could appear to have  
21 influenced the submitted work  
22

23 **Data Sharing Statement:** There are no additional unpublished data available from this study.  
24  
25  
26  
27  
28  
29  
30  
31  
32  
33  
34  
35  
36  
37  
38  
39  
40  
41  
42  
43  
44  
45  
46  
47  
48  
49  
50  
51  
52  
53  
54  
55  
56  
57  
58  
59  
60

**Table 1: Characteristics of refugee immigrant, non-refugee immigrant and Canadian-born mothers in Ontario, Canada 2002-2014.**

|                                                 | <b>Refugee immigrant<br/>(N = 34,233)</b> | <b>Non-refugee immigrant<br/>(N = 243,439)</b> | <b>Canadian-born<br/>(N = 615,394)</b> |
|-------------------------------------------------|-------------------------------------------|------------------------------------------------|----------------------------------------|
| <b>Maternal age at first birth, years</b>       |                                           |                                                |                                        |
| <i>15-19</i>                                    | 989 (2.9)                                 | 3,469 (1.4)                                    | 40,905 (6.6)                           |
| <i>20-24</i>                                    | 5,271 (15.4)                              | 30,330 (12.5)                                  | 98,808 (16.1)                          |
| <i>25-29</i>                                    | 10,231 (29.9)                             | 75,982 (31.2)                                  | 180,850 (29.4)                         |
| <i>30-34</i>                                    | 10,032 (29.3)                             | 79,885 (32.8)                                  | 191,433 (31.1)                         |
| <i>35-39</i>                                    | 5,958 (17.4)                              | 42,893 (17.6)                                  | 84,383 (13.7)                          |
| <i>≥ 40</i>                                     | 1,742 (5.1)                               | 10,843 (4.5)                                   | 18,624 (3.0)                           |
| <i>Missing</i>                                  | 10 (0.0)                                  | 37 (0.0)                                       | 391 (0.1)                              |
| <b>Parity at first birth in Ontario</b>         |                                           |                                                |                                        |
| <i>0</i>                                        | 18,826 (55.0)                             | 152,530 (62.7)                                 | 445,715 (72.4)                         |
| <i>1</i>                                        | 7,631 (22.3)                              | 62,708 (25.8)                                  | 109,462 (17.8)                         |
| <i>2</i>                                        | 4,317 (12.6)                              | 20,091 (8.3)                                   | 42,656 (6.9)                           |
| <i>≥3</i>                                       | 3,421 (10.0)                              | 7,892 (3.2)                                    | 16,635 (2.7)                           |
| <i>Missing</i>                                  | 38 (0.1)                                  | 218 (0.1)                                      | 926 (0.2)                              |
| <b>Number of births in Ontario</b>              |                                           |                                                |                                        |
| <i>1</i>                                        | 20,406 (59.6)                             | 148,694 (61.1)                                 | 328,458 (53.4)                         |
| <i>2</i>                                        | 10,356 (30.3)                             | 76,411 (31.4)                                  | 225,838 (36.7)                         |
| <i>3</i>                                        | 2,800 (8.2)                               | 15,473 (6.4)                                   | 50,262 (8.2)                           |
| <i>≥ 4</i>                                      | 671 (2.0)                                 | 2,861 (1.2)                                    | 10,836 (1.8)                           |
| <b>Neighbourhood income quintile</b>            |                                           |                                                |                                        |
| <i>1 (lowest)</i>                               | 15,332 (44.8)                             | 78,309 (32.2)                                  | 111,281 (18.1)                         |
| <i>2,3,4 (middle)</i>                           | 16,804 (49.1)                             | 141,357 (58.1)                                 | 386,578 (62.8)                         |
| <i>5 (highest)</i>                              | 2001 (5.8)                                | 22,926 (9.4)                                   | 113,769 (18.5)                         |
| <i>Missing</i>                                  | 96 (0.3)                                  | 847 (0.3)                                      | 3,766 (0.6)                            |
| <b>Official language ability at immigration</b> |                                           |                                                |                                        |
| <i>English and/or French</i>                    | 19,633 (57.4)                             | 157,788 (64.8)                                 | --                                     |
| <i>Neither English or French</i>                | 14,600 (42.6)                             | 85,645 (35.2)                                  | --                                     |
| <i>Missing</i>                                  | 0 (0.0)                                   | 6 (0.0)                                        | --                                     |
| <b>Level of education at immigration</b>        |                                           |                                                |                                        |
| <i>0-9 years</i>                                | 14,923 (43.6)                             | 56,485 (23.2)                                  | --                                     |
| <i>10-12 years</i>                              | 9,931 (29.0)                              | 48,137 (19.8)                                  | --                                     |
| <i>≥ 13 years</i>                               | 3,010 (8.8)                               | 22,380 (9.2)                                   | --                                     |
| <i>Trade, Diplomas</i>                          | 3,720 (10.9)                              | 30,852 (12.7)                                  | --                                     |
| <i>Bachelors, Masters, Doctorate</i>            | 2,649 (7.7)                               | 85,585 (35.2)                                  | --                                     |
| <b>Duration of residence, years</b>             |                                           |                                                |                                        |
| <i>&lt; 10</i>                                  | 21,569 (63.0)                             | 184,508 (75.8)                                 | --                                     |
| <i>≥ 10</i>                                     | 12,664 (37.0)                             | 58,931 (24.2)                                  | --                                     |
| <b>World region of birth</b>                    |                                           |                                                |                                        |
| <i>South Asia</i>                               | 9,233 (27.0)                              | 78,184 (32.1)                                  | --                                     |
| <i>Sub Saharan Africa</i>                       | 7,810 (22.8)                              | 11,733 (4.8)                                   | --                                     |
| <i>Latin America &amp; Caribbean</i>            | 4,928 (14.4)                              | 33,075 (13.6)                                  | --                                     |
| <i>Western &amp; Central Asia, North Africa</i> | 3,458 (10.1)                              | 17,502 (7.2)                                   | --                                     |
| <i>Eastern Europe</i>                           | 3,189 (9.3)                               | 18,542 (7.6)                                   | --                                     |
| <i>Southeast Asia, Oceania Islands</i>          | 1,514 (4.4)                               | 28,514 (11.7)                                  | --                                     |

|   |                                    |              |               |    |
|---|------------------------------------|--------------|---------------|----|
| 1 | <i>East Asia (excluding Japan)</i> | 1,878 (5.5)  | 35,669 (14.7) | -- |
| 2 | <i>Southern Europe</i>             | 1,966 (25.1) | 8,003 (30.8)  | -- |
| 3 | <i>Developed Countries</i>         | 250 (22.4)   | 12,152 (25.5) | -- |
| 4 | <i>Missing</i>                     | 7 (0.0)      | 65 (0.0)      | -- |

5  
6  
7  
8  
9  
10  
11  
12  
13  
14  
15  
16  
17  
18  
19  
20  
21  
22  
23  
24  
25  
26  
27  
28  
29  
30  
31  
32  
33  
34  
35  
36  
37  
38  
39  
40  
41  
42  
43  
44  
45  
46  
47  
48  
49  
50  
51  
52  
53  
54  
55  
56  
57  
58  
59  
60

For peer review only



## FIGURE LEGEND

**Figure 1: Adverse maternal outcomes comparing 29,023 first births in Ontario to refugee immigrants (● circles) vs. 29,023 first births in Ontario births to non-refugee immigrants (○ circles), 1:1 matched on country of birth, year and age at arrival (+/- 5 years). Risk ratios adjusted for maternal age, parity, income quintile, official language ability, education and duration of residence.**

Figure 1 footnote: ARR – adjusted risk ratio; CI – confidence interval; ICU – intensive care unit; HIV – human immunodeficiency virus

**Figure 2: Adverse perinatal outcomes comparing first births in Ontario to refugee immigrants (● circles) vs. first births in Ontario to non-refugee immigrants (○ circles), 1:1 matched on country of birth, year and age at arrival (+/- 5 years). Denominators vary with the outcome examined. Risk ratios adjusted for maternal age, parity, income quintile, official language ability, education and duration of residence.**

Figure 2 footnote: ARR – adjusted risk ratio; CI – confidence interval; NICU – neonatal intensive care unit

**Figure 3: Adverse maternal outcomes comparing 52,360 births to refugee immigrants (● circles) and 360,007 births to non-refugee immigrants (● circles) vs. 977,045 births to Canadian-born (○ circles) mothers. Risk ratios adjusted for maternal age, parity and income quintile.**

Figure 3 footnote: ARR – adjusted risk ratio; CI – confidence interval; ICU – intensive care unit; HIV – human immunodeficiency virus

**Figure 4: Adverse perinatal outcomes comparing births to refugee immigrants (● circles) and births to non-refugee immigrants (● circles) vs. births to Canadian-born mothers (○ circles). Denominators vary with the outcome examined. Risk ratios adjusted for maternal age, parity, and income quintile.**

Figure 4 footnote: ARR – adjusted risk ratio; CI – confidence interval; NICU – neonatal intensive care unit

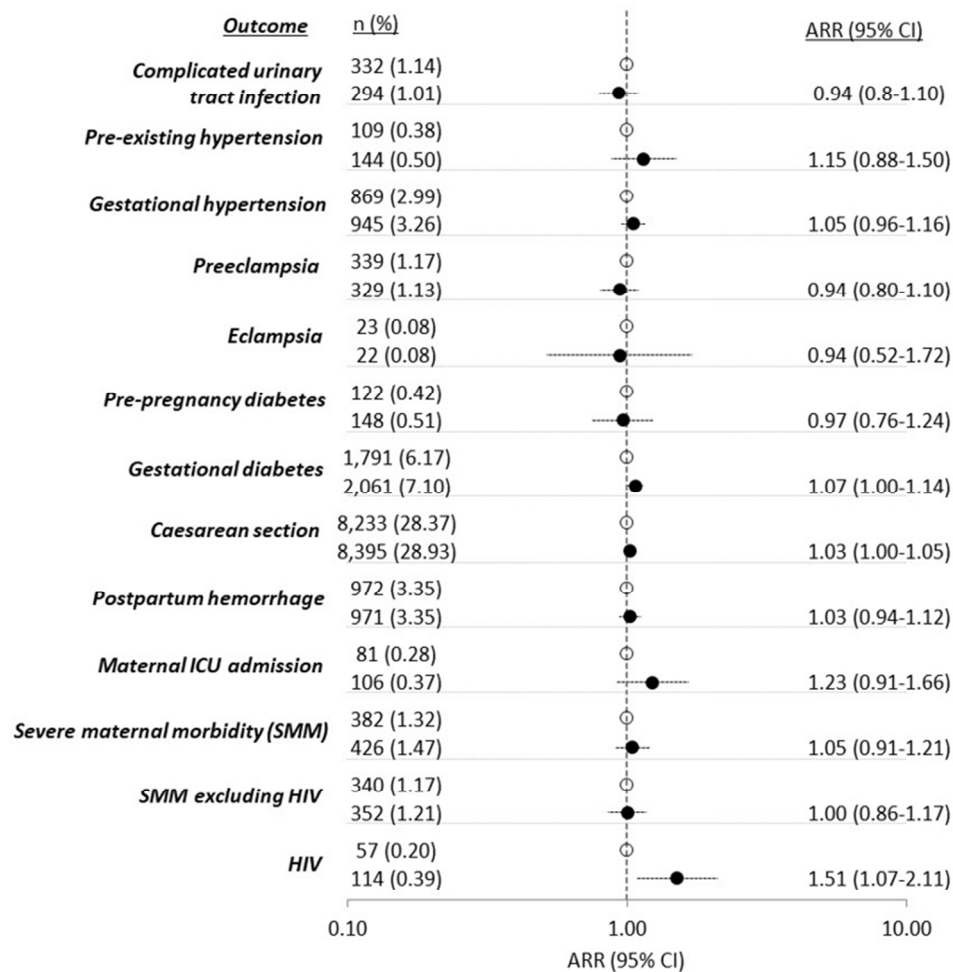

Figure 1: Adverse maternal outcomes comparing 29,023 first births in Ontario to refugee immigrants (black circles) vs. 29,023 first births in Ontario to non-refugee immigrants (white circles), 1:1 matched on country of birth, year and age at arrival (+/- 5 years). Risk ratios adjusted for maternal age, parity, income quintile, official language ability, education and duration of residence.

69x76mm (300 x 300 DPI)

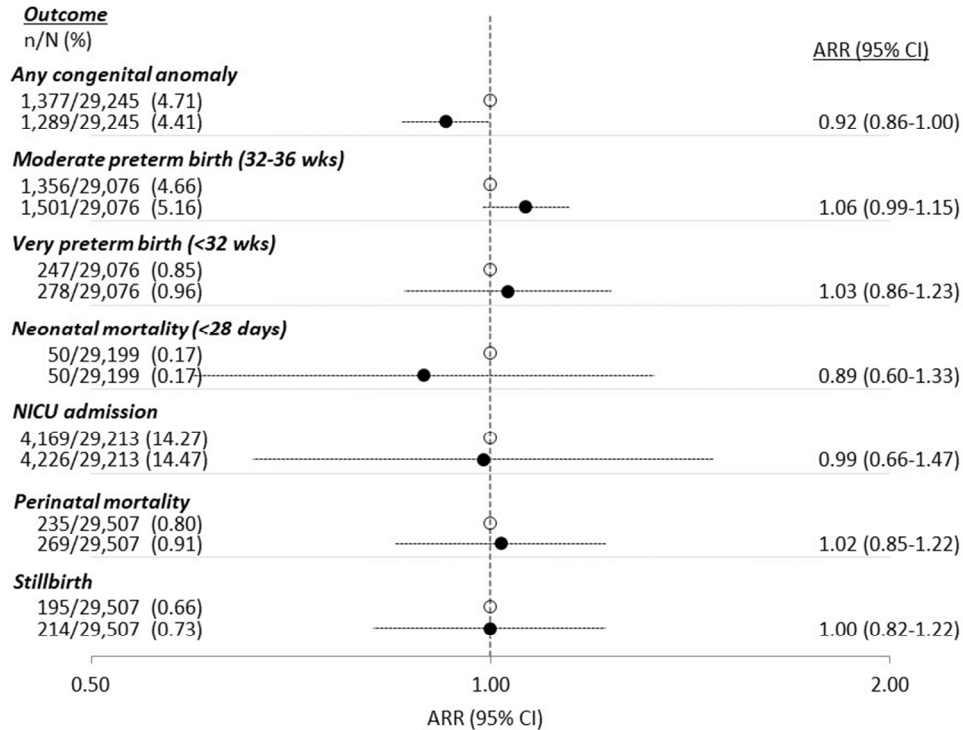

Figure 2: Adverse perinatal outcomes comparing first births in Ontario to refugee immigrants (black circles) vs. first births in Ontario to non-refugee immigrants (white circles), 1:1 matched on country of birth, year and age at arrival (+/- 5 years). Denominators vary with the outcome examined. Risk ratios adjusted for maternal age, parity, income quintile, official language ability, education and duration of residence.

76x62mm (300 x 300 DPI)

only

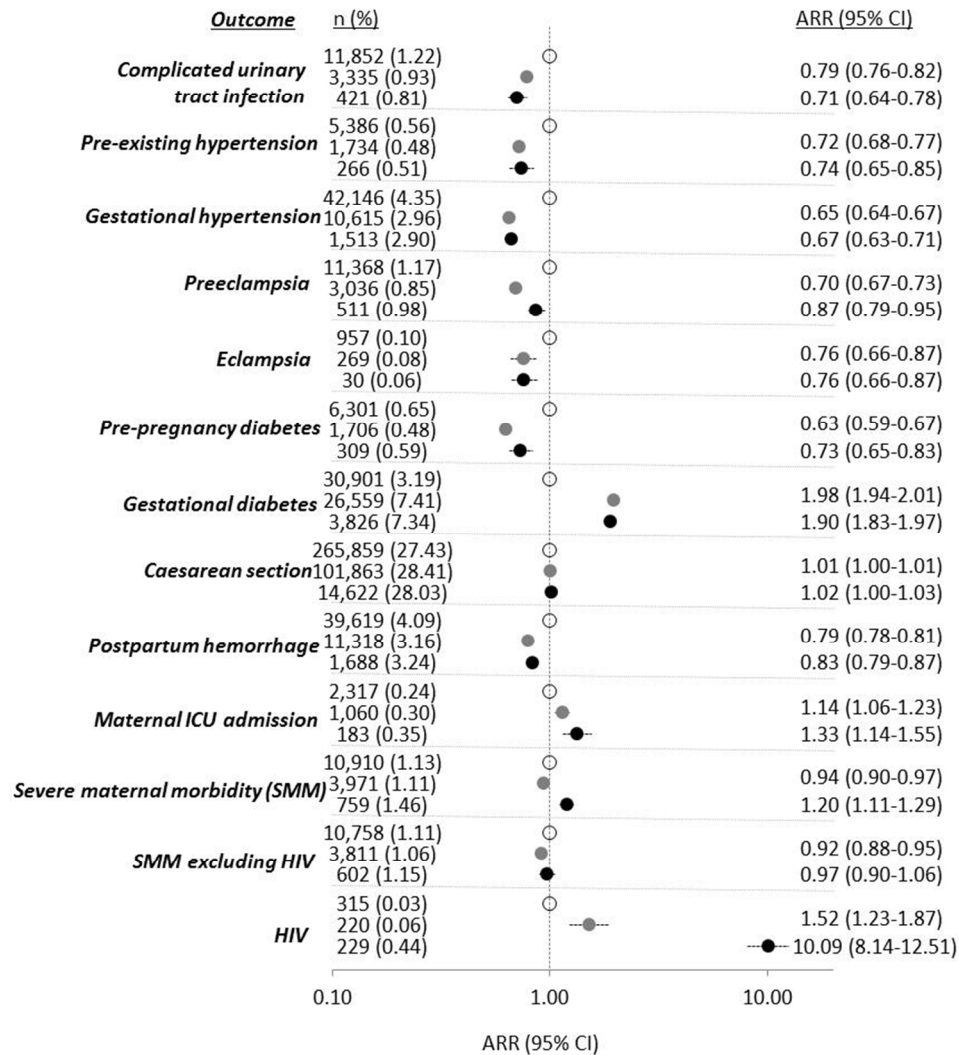

Figure 3: Adverse maternal outcomes comparing 52,360 births to refugee immigrants (black circles) and 360,007 births to non-refugee immigrants (grey circles) vs. 977,045 births to Canadian-born (white circles) mothers. Risk ratios adjusted for maternal age, parity and income quintile.

73x91mm (300 x 300 DPI)

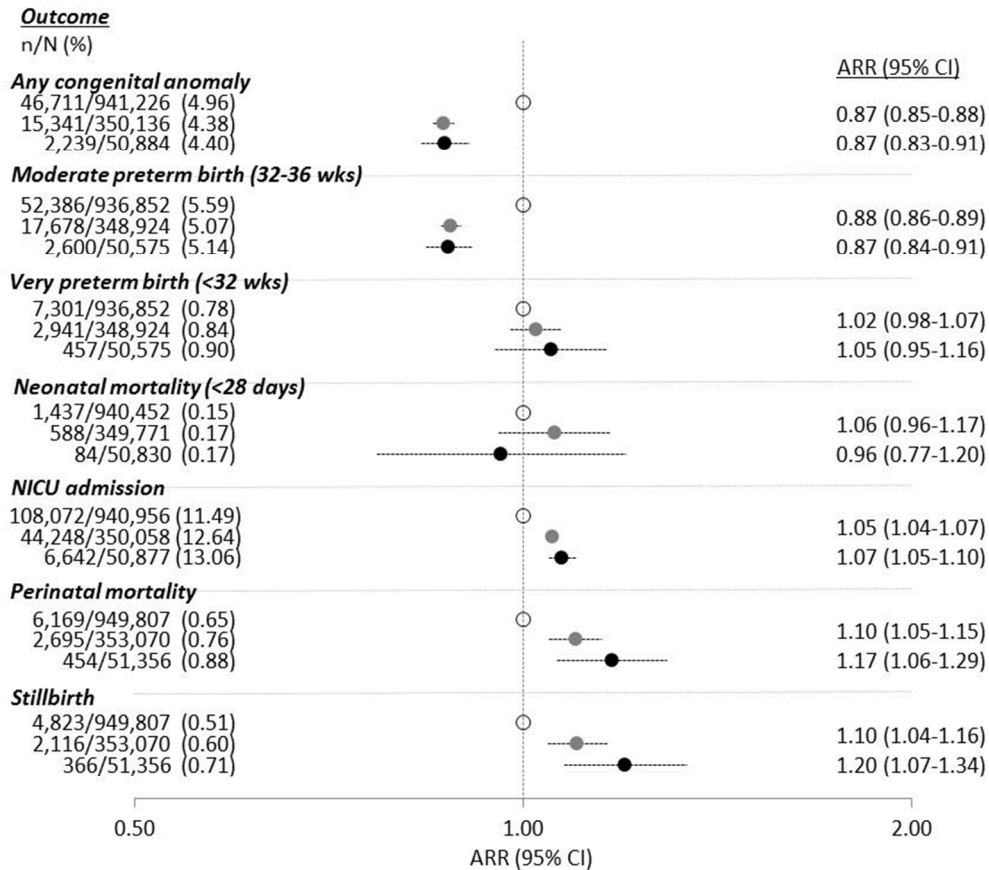

Figure 4: Adverse perinatal outcomes comparing births to refugee immigrants (black circles) and births to non-refugee immigrants (grey circles) vs. births to Canadian-born mothers (white circles). Denominators vary with the outcome examined. Risk ratios adjusted for maternal age, parity, and income quintile.

72x67mm (300 x 300 DPI)

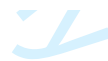

Wanigaratne *et al* - Supplementary Material

Refugee maternal and perinatal health in Ontario Canada: a retrospective population-based study

## SUPPLEMENTARY TABLES

Table S1: List of 10th revision of the *International Statistical Classification of Diseases and Related Health Problems*, Canadian enhancement, and *Canadian Classification of Health Interventions* (ICD-10-CA/CCI) codes for maternal and perinatal outcomes

| Maternal or Perinatal Outcome                 | Definition                                                                 | Source Database | ICD-10-CA/CCI                                              |
|-----------------------------------------------|----------------------------------------------------------------------------|-----------------|------------------------------------------------------------|
| Complicated urinary tract infection           |                                                                            | CIHI-DAD        | O23, O86, N39                                              |
| Pre-existing hypertension                     |                                                                            | CIHI-DAD        | O10, O11                                                   |
| Gestational hypertension                      |                                                                            | CIHI-DAD        | O13                                                        |
| Preeclampsia                                  |                                                                            |                 | O14                                                        |
| Eclampsia                                     |                                                                            | CIHI-DAD        | O15                                                        |
| Pre-pregnancy diabetes mellitus               |                                                                            | CIHI-DAD        | O24.0-O24.3                                                |
| Gestational diabetes mellitus (GDM)           |                                                                            | CIHI-DAD        | O24.4                                                      |
| Caesarean delivery                            |                                                                            | CIHI-DAD        | 5.MD.60.^                                                  |
| Post-partum hemorrhage                        |                                                                            | CIHI-DAD        | O72                                                        |
| Maternal intensive care unit (ICU) admission  |                                                                            | CIHI-DAD        | Special Care Unit 1-6                                      |
| Severe maternal morbidity                     |                                                                            | CIHI-DAD        | See Joseph et al, 2010*                                    |
| HIV                                           | Three physician diagnoses within three years.                              | Ontario HIV DB  |                                                            |
| Congenital anomaly                            | An abnormality of structure or function present at birth                   | CIHI-DAD        | ICD-10: Q00-Q99                                            |
| Moderate preterm birth (PTB)                  | Live birth with gestational age 32-36 weeks                                | CIHI-DAD        | 32-36 weeks gestation recorded on CIHI-DAD birth record    |
| Very preterm birth (VPTB)                     | Live birth with gestational age <32 weeks                                  | CIHI-DAD        | < 32 weeks gestation recorded on CIHI-DAD birth record     |
| Neonatal mortality                            | Death <28 days of life                                                     | RPDB, ORG-VSD   |                                                            |
| Neonatal intensive care unit (NICU) admission |                                                                            | CIHI-DAD        | Special care unit admission, any level                     |
| Perinatal mortality                           | Stillbirth or death of live born infant < 7 days of life                   | RPDB, ORG-VSD   |                                                            |
| Stillbirth                                    | Intrauterine fetal death $\geq$ 20 weeks gestation and > 500 g birthweight | CIHI-DAD        | Maternal record: Z371, Z373-7, O364.<br>Infant record: P95 |

## Abbreviations

ICD-10-CA/CCI - 10th revision of the *International Statistical Classification of Diseases and Related Health Problems*, Canadian enhancement, and *Canadian Classification of Health Interventions* (ICD-10-CA/CCI)

CIHI-DAD – Canadian Institute for Health Information – Discharge Abstract Database

RPDB – Registered Persons Database (referred to as “Ontario Health Care Registry” in paper)

ORGD-VSD – Office of the Registrar General’s Vital Statistics-Death Registry

\* Joseph KS, Liu S, Rouleau J, Kirby RS, Kramer MS, Sauve R, et al. Severe maternal morbidity in Canada, 2003 to 2007: surveillance using routine hospitalization data and ICD-10CA codes. *J Obstet Gynaecol Can.* 2010;32(9):837

Wanigaratne *et al* - Supplementary Material

Refugee maternal and perinatal health in Ontario Canada: a retrospective population-based study

Table S2: Unadjusted Risk Ratios (RR) (95% CI) for Figures 1 and 2

| <b>FIGURE 1</b>                        |                               |
|----------------------------------------|-------------------------------|
| <b>OUTCOME</b>                         | <b>UNADJUSTED RR (95% CI)</b> |
| Complicated urinary tract infection    | 0.89 (0.76-1.03)              |
| Pre-existing hypertension              | 1.32 (1.03-1.69)              |
| Gestational hypertension               | 1.09 (0.99-1.19)              |
| Preeclampsia                           | 0.97 (0.83-1.13)              |
| Eclampsia                              | 0.96 (0.53-1.72)              |
| Pre-pregnancy diabetes mellitus        | 1.21 (0.96-1.54)              |
| Gestational diabetes mellitus (GDM)    | 1.15 (1.08-1.22)              |
| Caesarean delivery                     | 1.02 (0.99-1.05)              |
| Post-partum hemorrhage                 | 1.00 (0.92-1.09)              |
| Maternal intensive care unit admission | 1.31 (0.98-1.75)              |
| Severe maternal morbidity (SMM)        | 1.12 (0.97-1.28)              |
| SMM excluding HIV                      | 1.04 (0.89-1.20)              |
| HIV                                    | 2.00 (1.46-2.73)              |
| <b>FIGURE 2</b>                        |                               |
| <b>OUTCOME</b>                         | <b>UNADJUSTED RR (95% CI)</b> |
| Congenital anomaly                     | 0.94 (0.87-1.01)              |
| Moderate preterm birth (MPTB)          | 1.11 (1.03-1.19)              |
| Very preterm birth (VPTB)              | 1.13 (0.95-1.34)              |
| Neonatal mortality                     | 1.00 (0.68-1.48)              |
| Neonatal intensive care unit admission | 1.01 (0.98-1.05)              |
| Perinatal mortality                    | 1.14 (0.96-1.36)              |
| Stillbirth                             | 1.10 (0.90-1.33)              |

Wanigaratne *et al* - Supplementary Material

Refugee maternal and perinatal health in Ontario Canada: a retrospective population-based study

Table S3: Unadjusted Risk Ratios (RR) (95% CI) for Figures 3 and 4

| FIGURE 3<br>OUTCOME                           | UNADJUSTED RR (95% CI) |                      |
|-----------------------------------------------|------------------------|----------------------|
|                                               | REFUGEES VS. CDN       | NON-REFUGEES VS. CDN |
| Complicated urinary tract infection           | 0.66 (0.60-0.73)       | 0.76 (0.73-0.79)     |
| Pre-existing hypertension                     | 0.92 (0.81-1.05)       | 0.86 (0.81-0.91)     |
| Gestational hypertension                      | 0.67 (0.63-0.70)       | 0.68 (0.66-0.69)     |
| Preeclampsia                                  | 0.83 (0.76-0.91)       | 0.72 (0.69-0.75)     |
| Eclampsia                                     | 0.58 (0.40-0.84)       | 0.60 (0.42-0.86)     |
| Pre-pregnancy diabetes mellitus               | 0.35 (0.30-0.39)       | 0.72 (0.68-0.76)     |
| Gestational diabetes mellitus (GDM)           | 2.27 (2.19-2.36)       | 2.30 (2.26-2.34)     |
| Caesarean delivery                            | 1.03 (1.02-1.05)       | 1.05 (1.05-1.06)     |
| Post-partum hemorrhage (PPH)                  | 0.80 (0.76-0.84)       | 0.78 (0.77-0.80)     |
| Maternal intensive care unit admission        | 1.46 (1.26-1.70)       | 1.23 (1.15-1.33)     |
| Severe maternal morbidity (SMM)               | 1.29 (1.20-1.40)       | 0.98 (0.95-1.02)     |
| SMM without HIV                               | 1.04 (0.96-1.13)       | 0.96 (0.92-0.99)     |
| HIV                                           | 13.84 (11.32-16.93)    | 1.85 (1.51-2.26)     |
| FIGURE 4<br>OUTCOME                           |                        |                      |
| Congenital anomaly                            | 0.89 (0.85-0.92)       | 0.88 (0.87-0.90)     |
| Moderate preterm birth (MPTB)                 | 0.92 (0.89-0.96)       | 0.91 (0.89-0.92)     |
| Very preterm birth (VPTB)                     | 1.08 (1.03-1.13)       | 1.16 (1.06-1.28)     |
| Neonatal mortality                            | 1.08 (0.87-1.35)       | 1.10 (1.00-1.21)     |
| Neonatal intensive care unit (NICU) admission | 1.13 (1.11-1.16)       | 1.10 (1.09-1.11)     |
| Perinatal mortality                           | 1.36 (1.24-1.50)       | 1.17 (1.12-1.23)     |
| Stillbirth                                    | 1.40 (1.26-1.56)       | 1.18 (1.12-1.24)     |



Wanigaratne *et al* - Supplementary Material

Refugee maternal and perinatal health in Ontario Canada: a retrospective population-based study

SUPPLEMENTARY FIGURES

Figure S1a: Adverse maternal outcomes comparing 5,724 births to Sri Lankan refugee immigrants (▲ triangles) vs. 17,373 births to Sri Lankan non-refugee immigrants (△ triangles). Risk ratios adjusted for maternal age, parity, income quintile, official language ability, education and duration of residence.

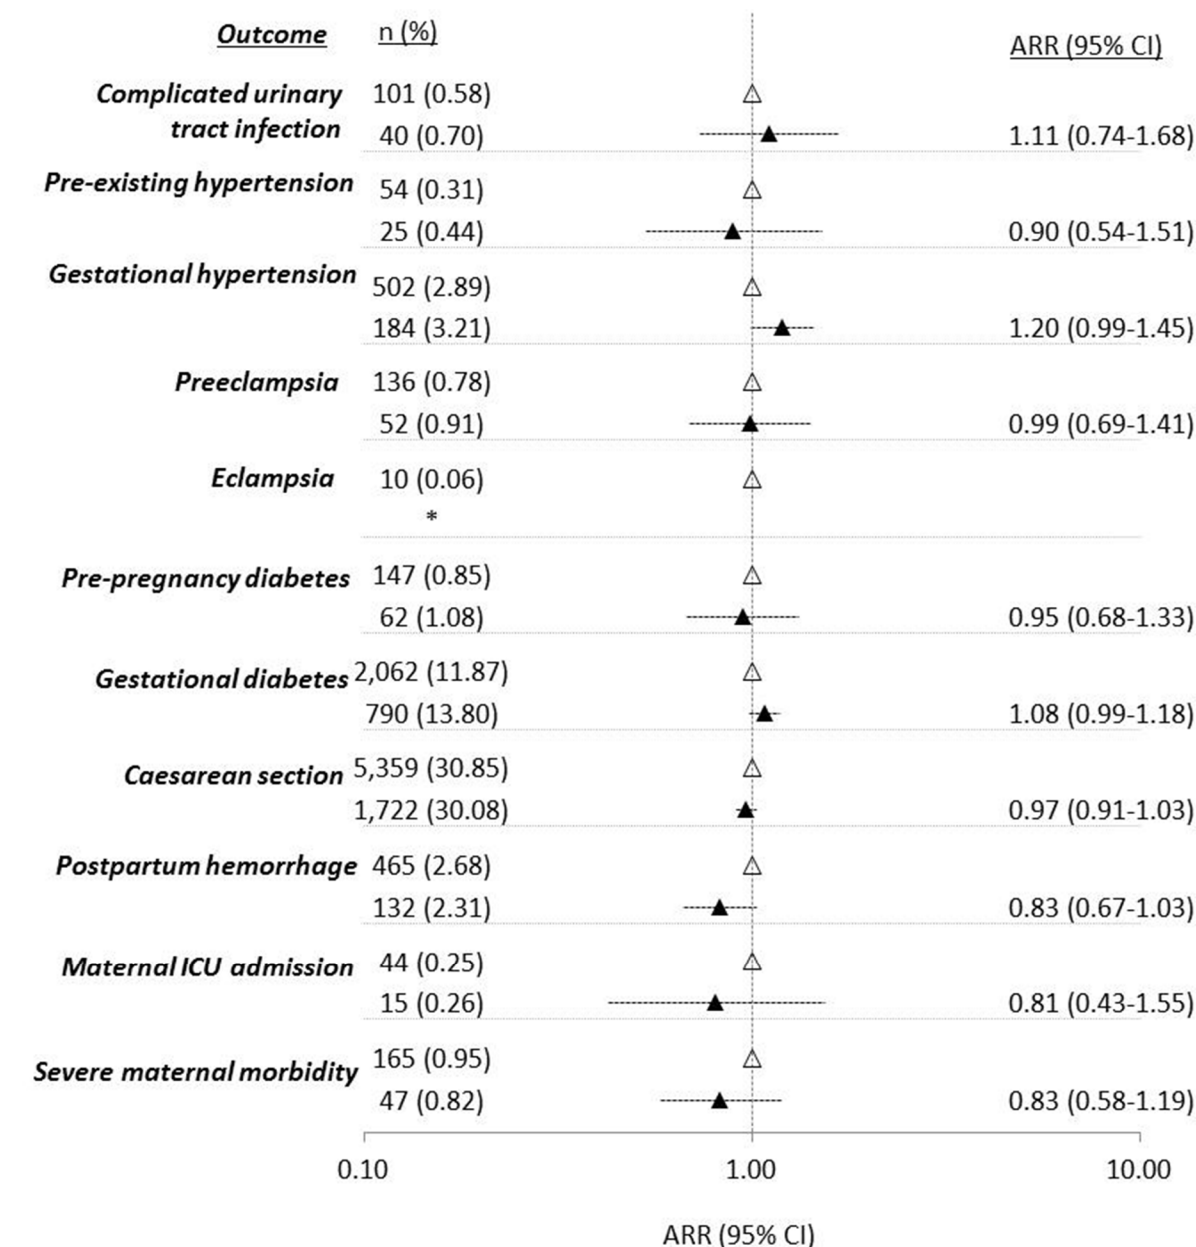

ARR – adjusted risk ratio; CI – confidence interval; ICU – intensive care unit; HIV – human immunodeficiency virus

Wanigaratne *et al* - Supplementary Material

Refugee maternal and perinatal health in Ontario Canada: a retrospective population-based study

**Figure S1b: Adverse perinatal outcomes comparing births to Sri Lankan refugee immigrants (▲ triangles) vs. births to Sri Lankan non-refugee immigrants (△ triangles). Risk ratios adjusted for maternal age, parity, income quintile, official language ability, education and duration of residence.**

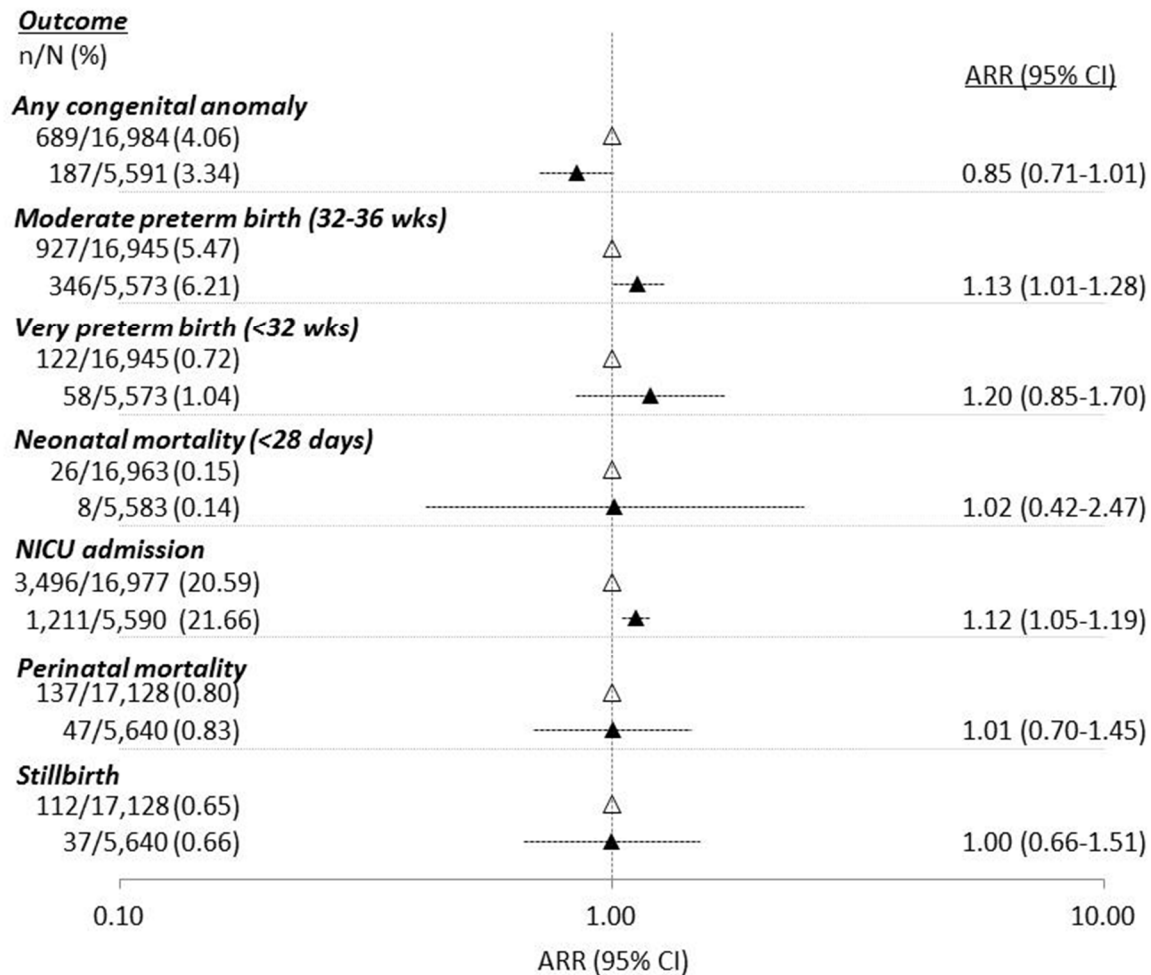

ARR – adjusted risk ratio; CI – confidence interval; NICU – neonatal intensive care unit

Wanigaratne *et al* - Supplementary Material

Refugee maternal and perinatal health in Ontario Canada: a retrospective population-based study

**Figure S2a: Adverse maternal outcomes comparing 2,453 births to Somali refugee immigrants (▲ triangles) vs. 4,499 births to Somali non-refugee immigrants (△ triangles). Risk ratios adjusted for maternal age, parity, income quintile, official language ability, education and duration of residence.**

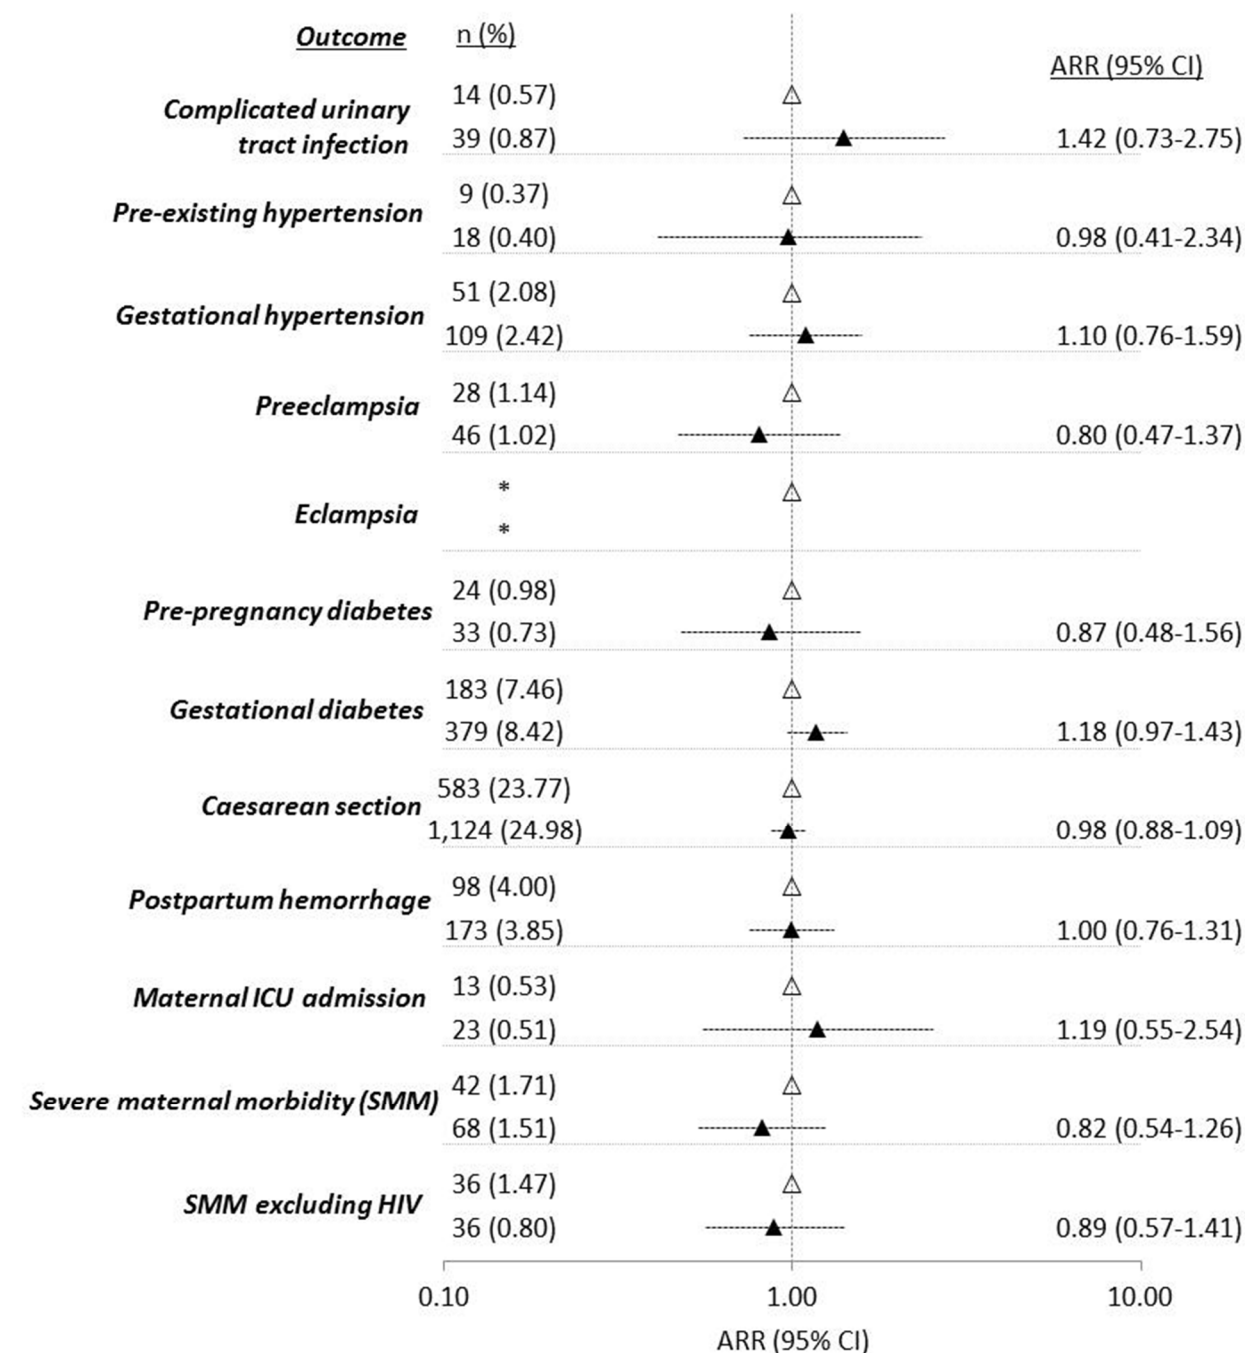

ARR – adjusted risk ratio; CI – confidence interval; ICU – intensive care unit; HIV – human immunodeficiency virus

Wanigaratne *et al* - Supplementary Material

Refugee maternal and perinatal health in Ontario Canada: a retrospective population-based study

**Figure S2b: Adverse perinatal outcomes comparing births to Somali refugee immigrants ( ▲triangles) vs. births to Somali non-refugee immigrants ( Δtriangles). Risk ratios adjusted for maternal age, parity, income quintile, official language ability, education and duration of residence.**

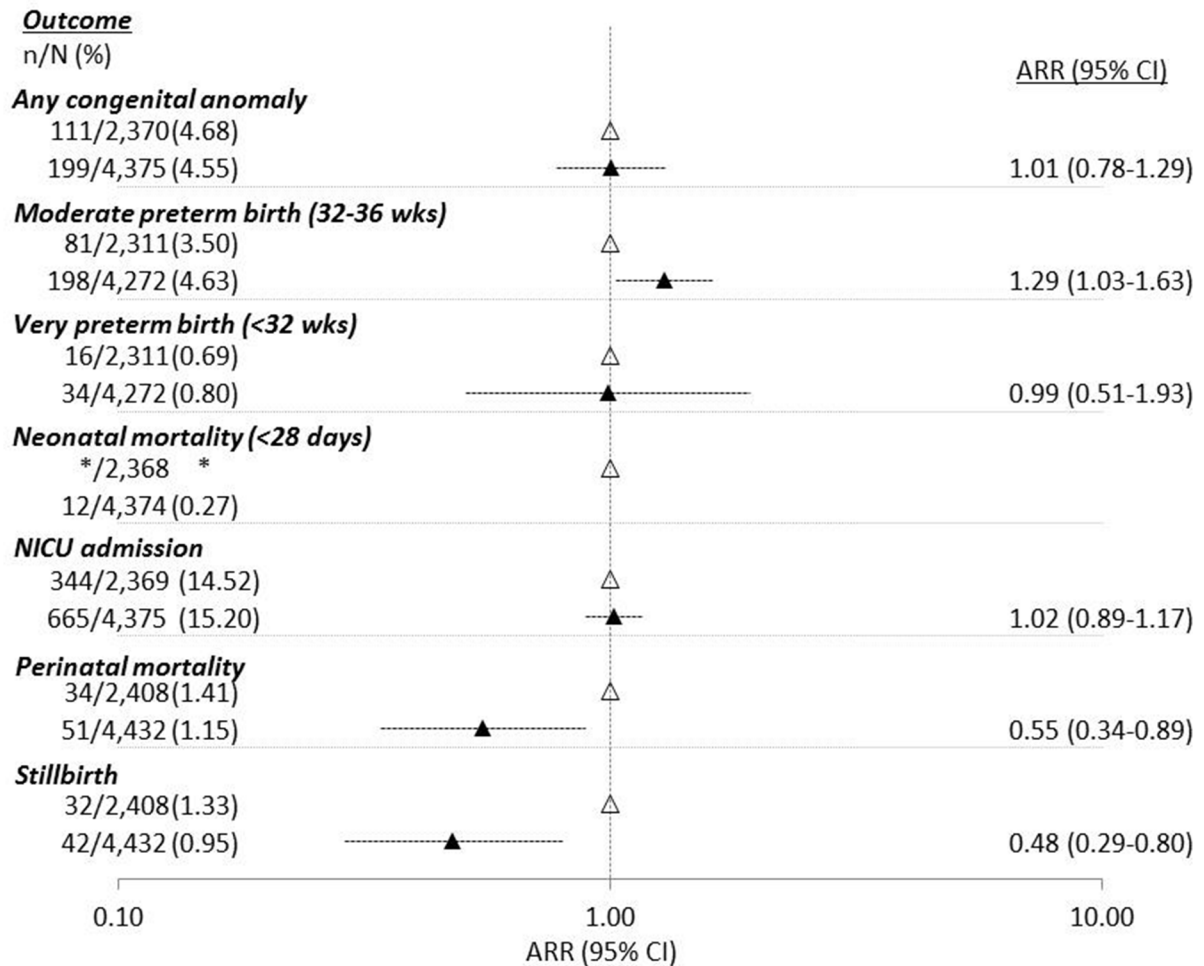

ARR – adjusted risk ratio; CI – confidence interval; NICU – neonatal intensive care unit

Wanigaratne *et al* - Supplementary Material

Refugee maternal and perinatal health in Ontario Canada: a retrospective population-based study

**Figure S3a: Adverse maternal outcomes comparing 4,210 births to Afghan refugee immigrants (▲ triangles) vs. 3,905 births to Afghan non-refugee immigrants (△ triangles). Risk ratios adjusted for maternal age, parity, income quintile, official language ability, education and duration of residence.**

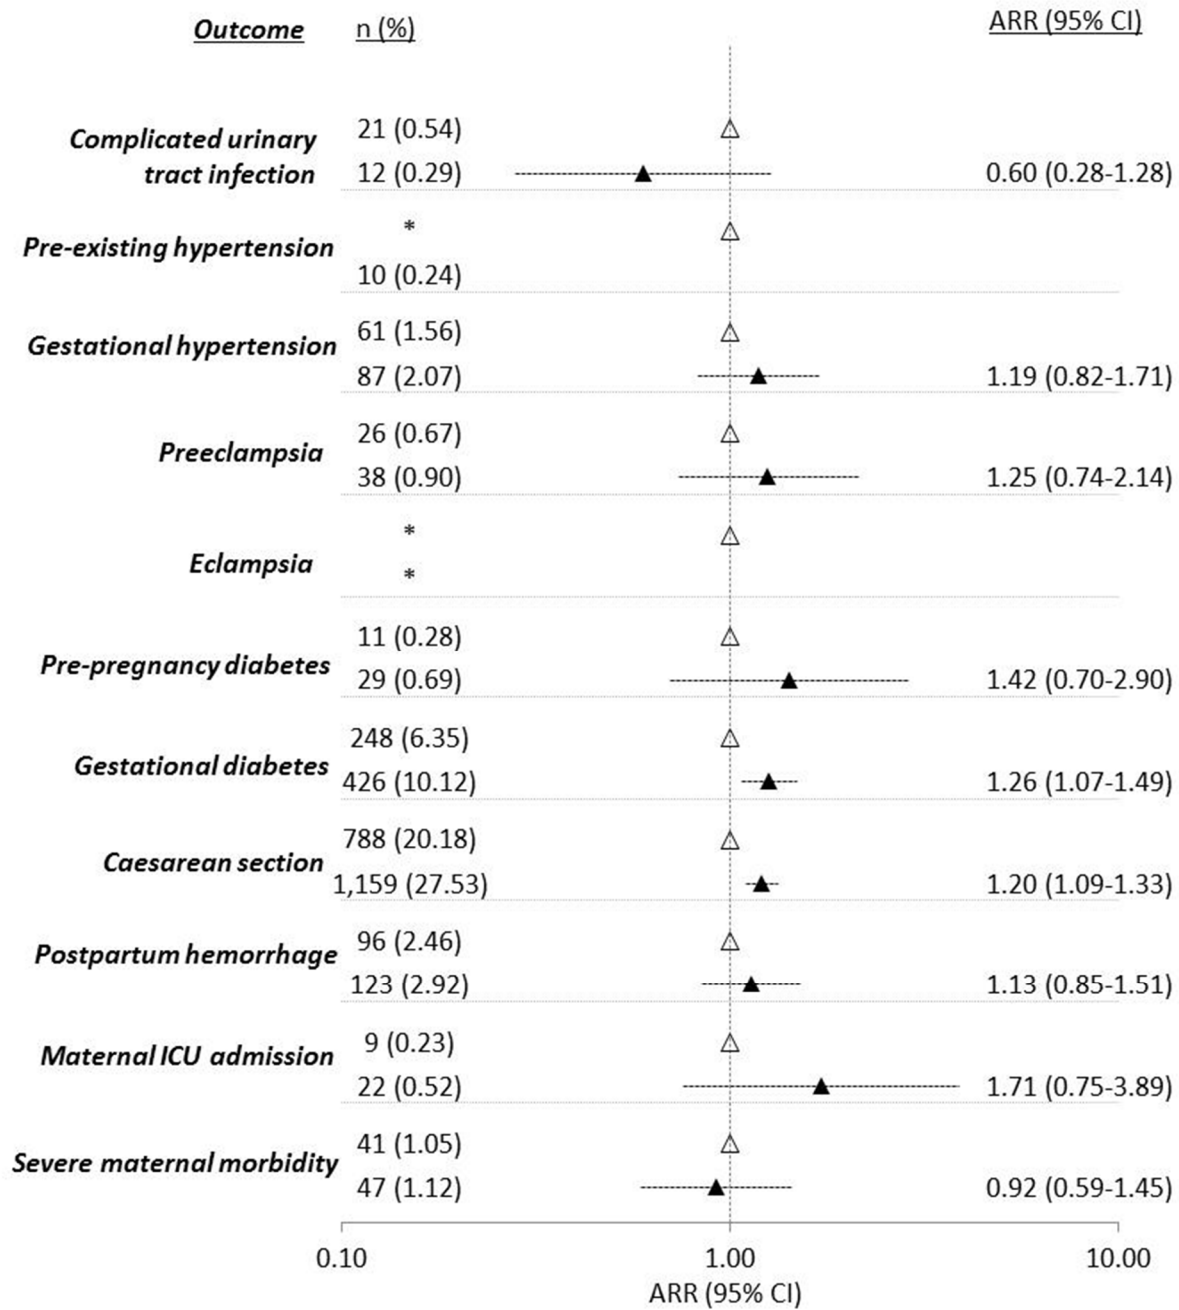

ARR – adjusted risk ratio; CI – confidence interval; ICU – intensive care unit; HIV – human immunodeficiency virus

Wanigaratne *et al* - Supplementary Material

Refugee maternal and perinatal health in Ontario Canada: a retrospective population-based study

**Figure S3b: Adverse perinatal outcomes comparing births to Afghan refugee immigrants (▲ triangles) vs. births to Afghan non-refugee immigrants (△ triangles). Risk ratios adjusted for maternal age, parity, income quintile, official language ability, education and duration of residence.**

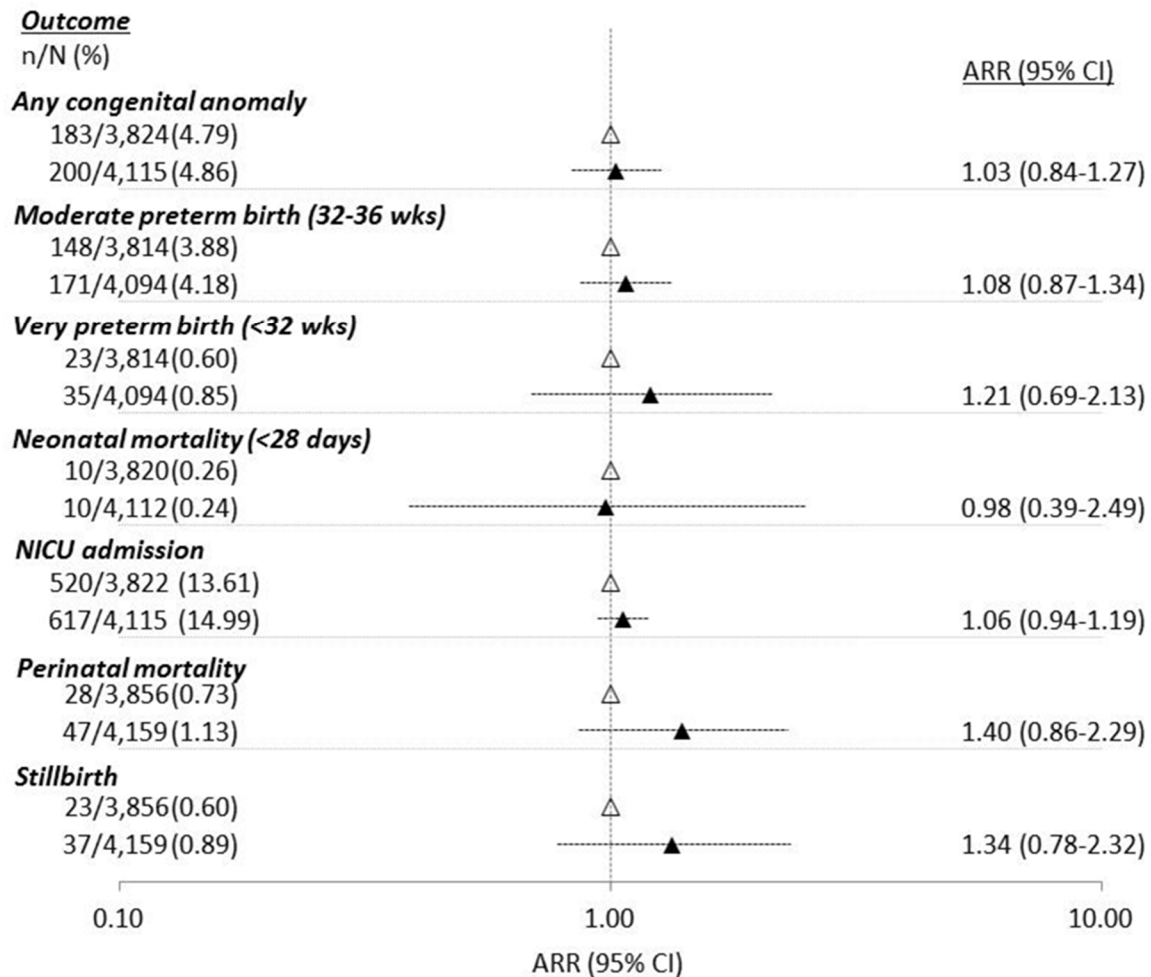

ARR – adjusted risk ratio; CI – confidence interval; NICU – neonatal intensive care unit

Wanigaratne *et al* - Supplementary Material

Refugee maternal and perinatal health in Ontario Canada: a retrospective population-based study

**Figure S4a: Adverse maternal outcomes comparing 2,613 births to Iraqi refugee immigrants (▲ triangles) vs. 4,239 births to Iraqi non-refugee immigrants (△ triangles). Risk ratios adjusted for maternal age, parity, income quintile, official language ability, education and duration of residence.**

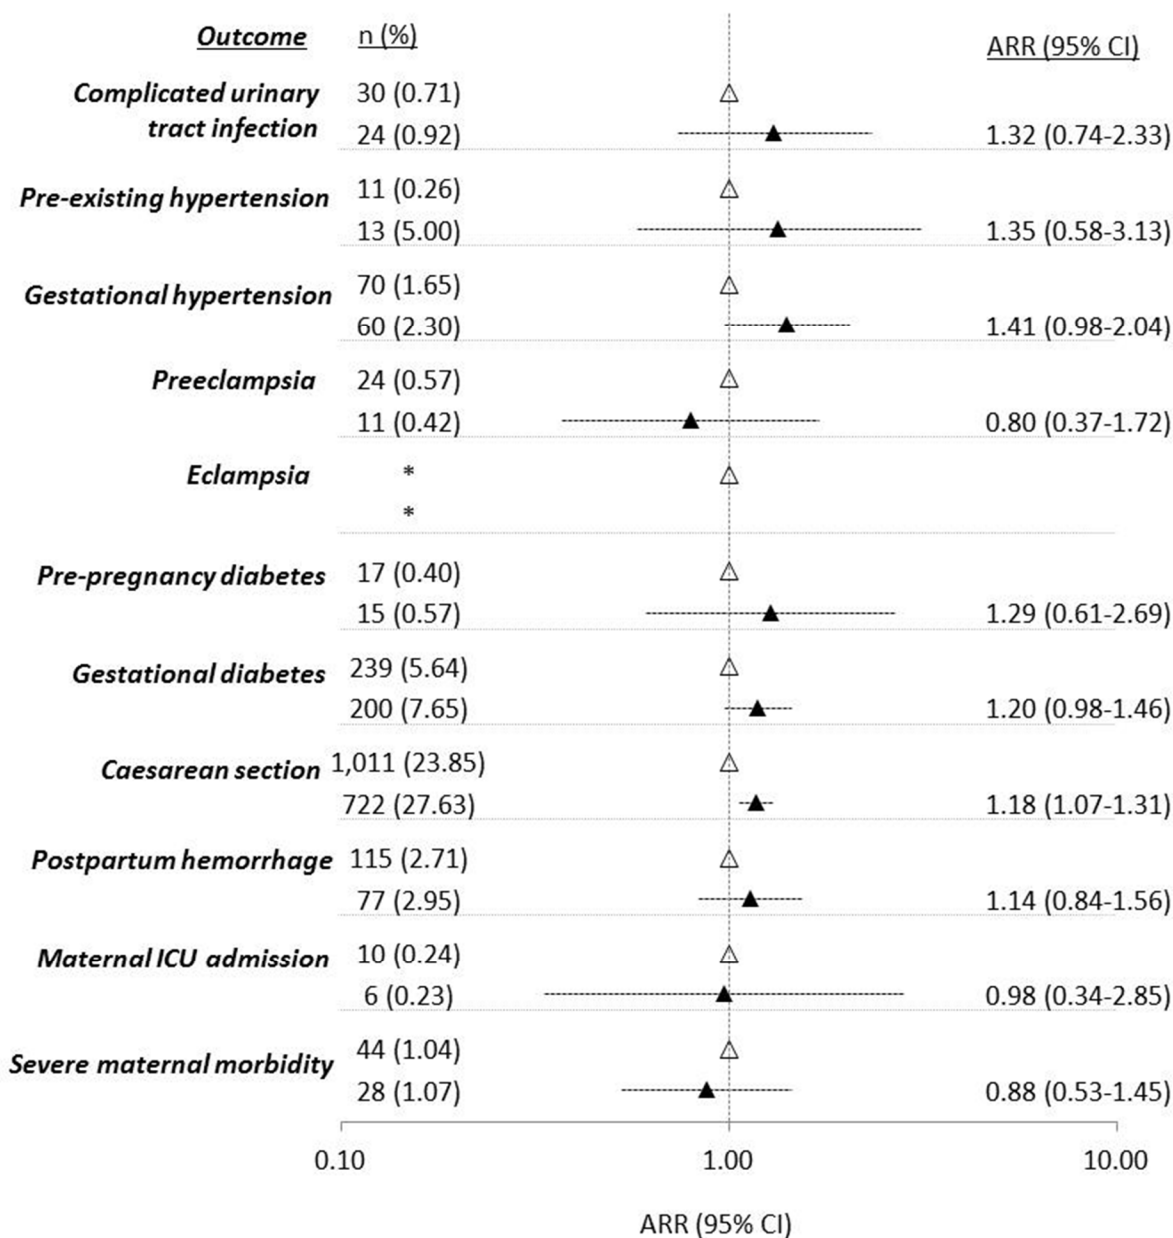

ARR – adjusted risk ratio; CI – confidence interval; ICU – intensive care unit; HIV – human immunodeficiency virus

Wanigaratne *et al* - Supplementary Material

Refugee maternal and perinatal health in Ontario Canada: a retrospective population-based study

**Figure S4b: Adverse perinatal outcomes comparing births to Iraqi refugee immigrants (▲triangles) vs. births to Iraqi non-refugee immigrants (△triangles). Risk ratios adjusted for maternal age, parity, income quintile, official language ability, education and duration of residence**

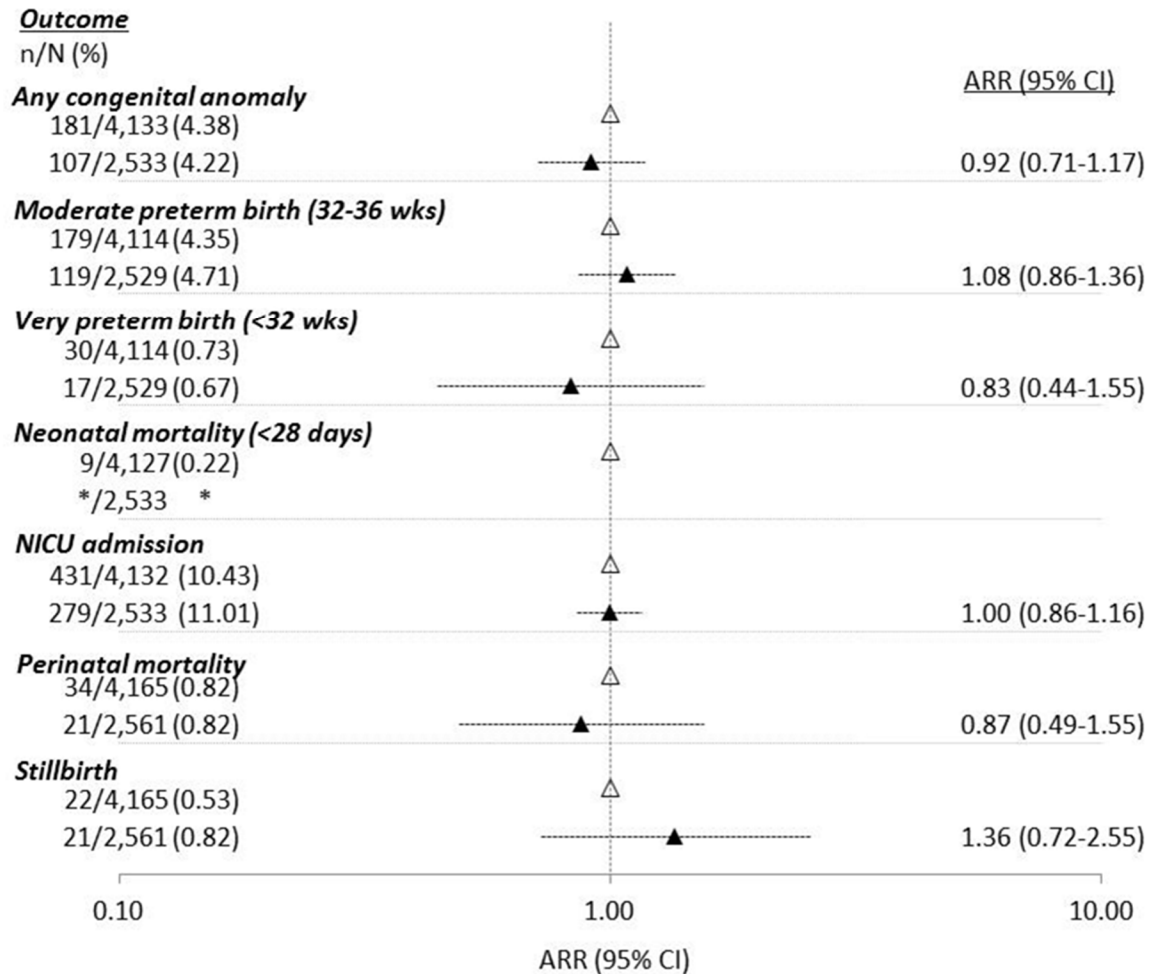

ARR – adjusted risk ratio; CI – confidence interval; NICU – neonatal intensive care unit



Wanigaratne *et al* - Supplementary Material

Refugee maternal and perinatal health in Ontario Canada: a retrospective population-based study

Figure S5a: Adverse maternal outcomes comparing 2,527 births to Chinese refugee immigrants (▲ triangles) vs. 37,093 births to Chinese non-refugee immigrants (△ triangles). Risk ratios adjusted for maternal age, parity, income quintile, official language ability, education and duration of residence.

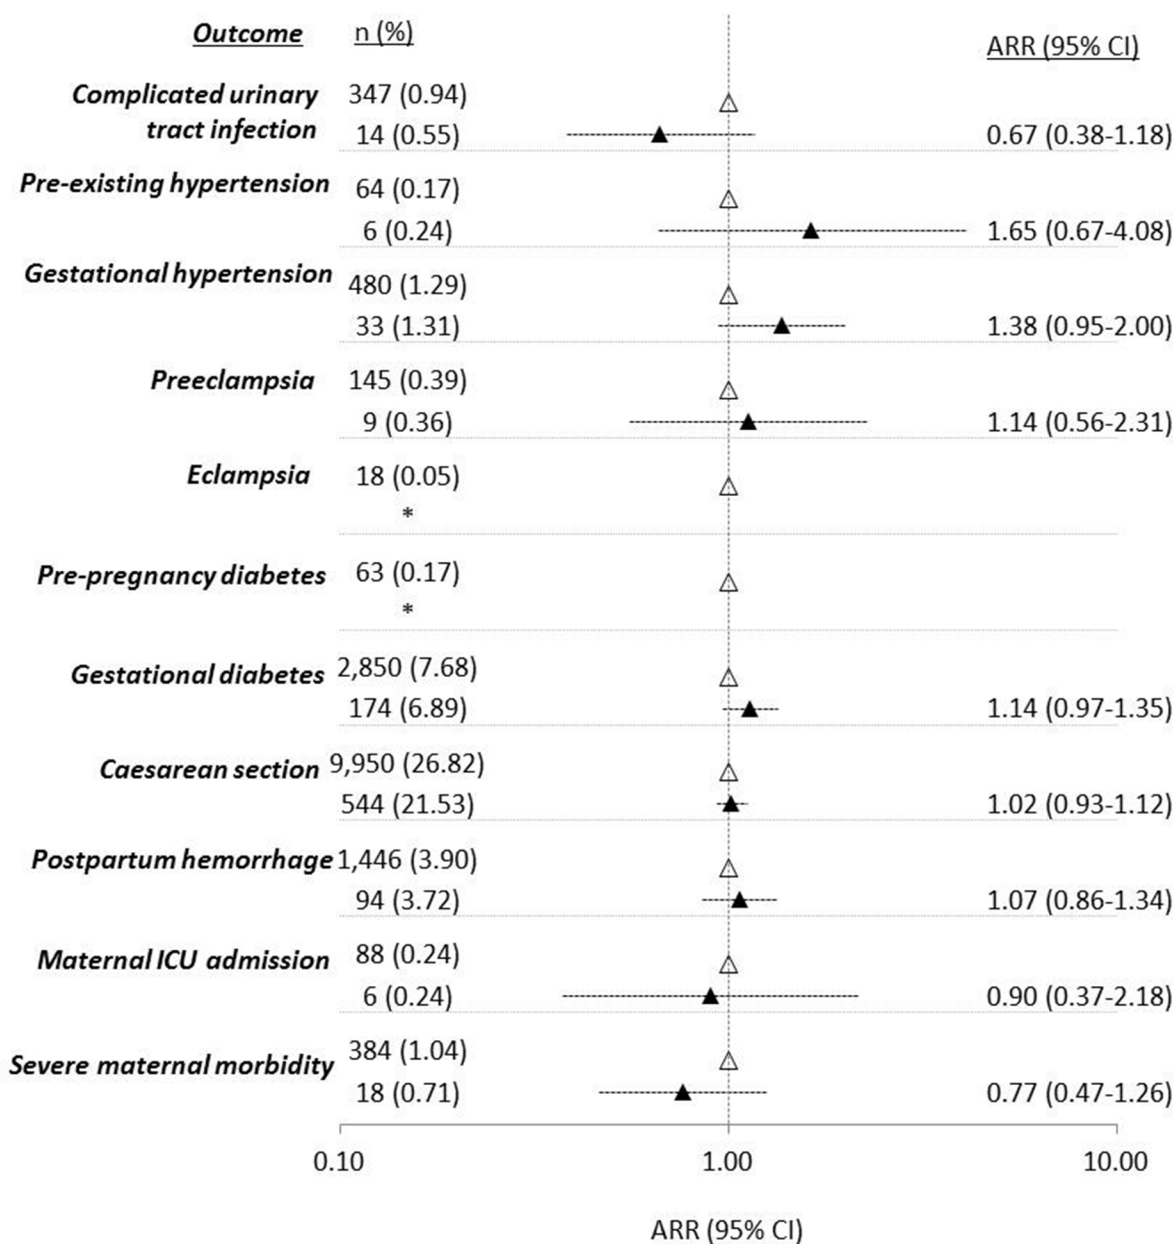

ARR – adjusted risk ratio; CI – confidence interval; ICU – intensive care unit; HIV – human immunodeficiency virus

Wanigaratne *et al* - Supplementary Material

Refugee maternal and perinatal health in Ontario Canada: a retrospective population-based study

**Figure S5b: Adverse perinatal outcomes comparing births to Chinese refugee immigrants (▲triangles) vs. births to Chinese non-refugee immigrants (△triangles). Risk ratios adjusted for maternal age, parity, income quintile, official language ability, education and duration of residence.**

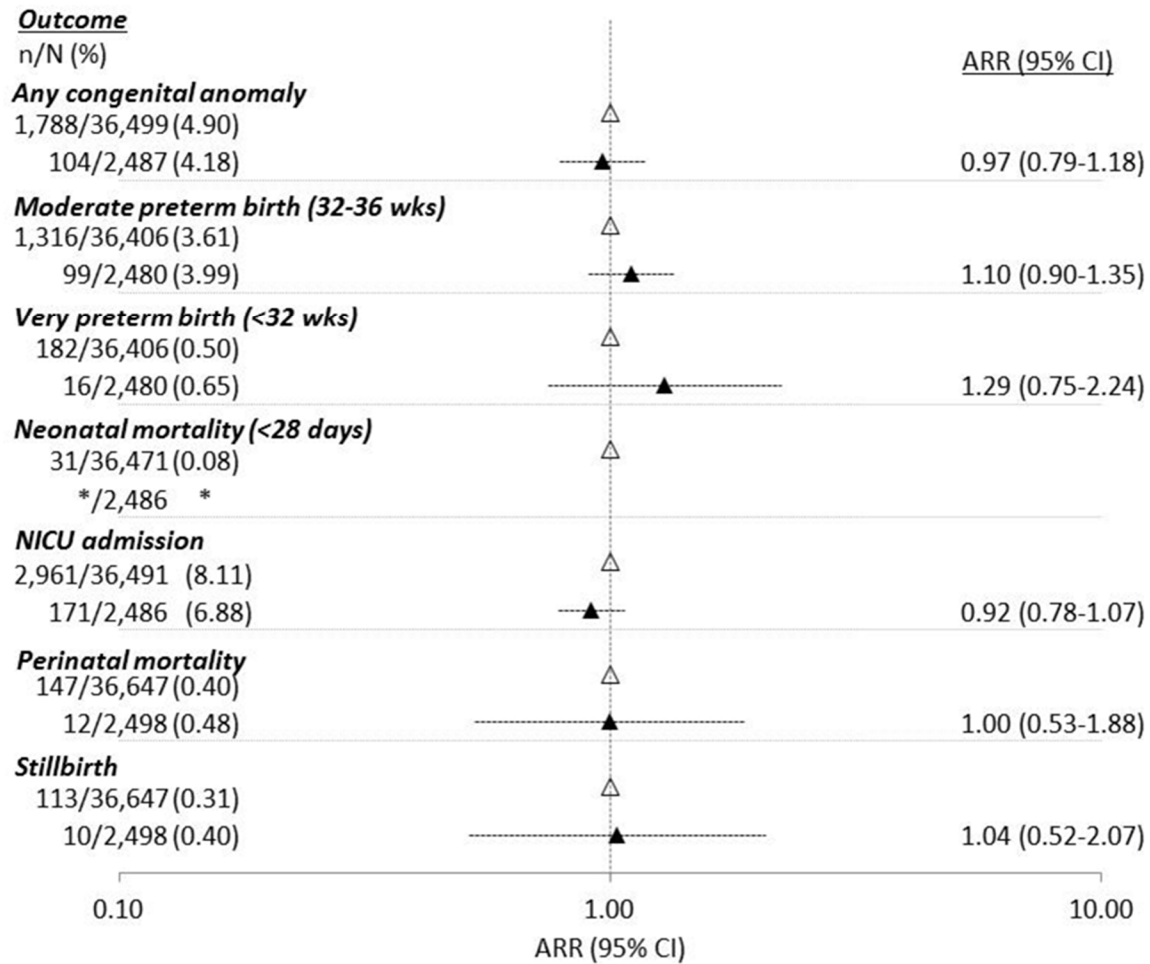

ARR – adjusted risk ratio; CI – confidence interval; NICU – neonatal intensive care unit

Wanigaratne *et al* - Supplementary Material

Refugee maternal and perinatal health in Ontario Canada: a retrospective population-based study

**Figure S6: Adverse maternal outcomes comparing 52,158 births to ALL refugee immigrants (■ squares) vs. 358,589 births to ALL non-refugee immigrants (□ squares), UNMATCHED on country of birth. Risk ratios\* adjusted for maternal age, parity, income quintile, official language ability, education and duration of residence.**

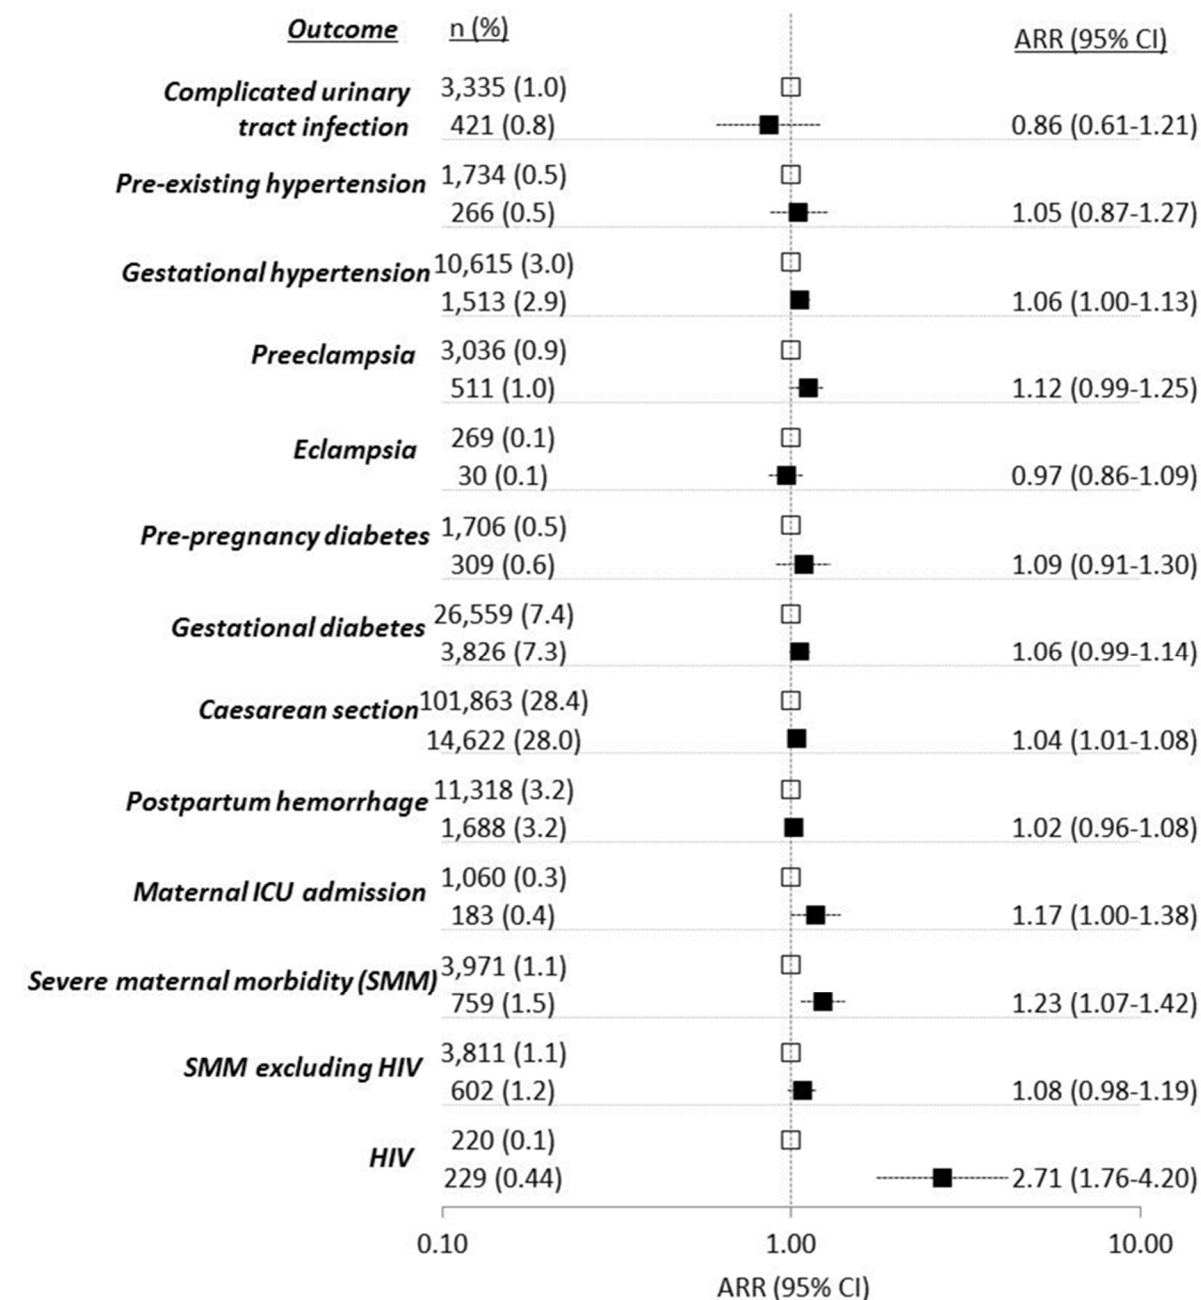

ARR – adjusted risk ratio; CI – confidence interval; ICU – intensive care unit; HIV – human immunodeficiency virus

\*Estimated using log-binomial regression with generalized estimating equations to account for potential correlation among mothers from the same country of birth.

Wanigaratne *et al* - Supplementary Material

Refugee maternal and perinatal health in Ontario Canada: a retrospective population-based study

**Figure S7: Adverse perinatal outcomes comparing births to ALL refugee immigrants (■ squares) vs. births to ALL non-refugee immigrants (□ squares), UNMATCHED on country of birth. Risk ratios\* adjusted for maternal age, parity, income quintile, official language ability, education and duration of residence.**

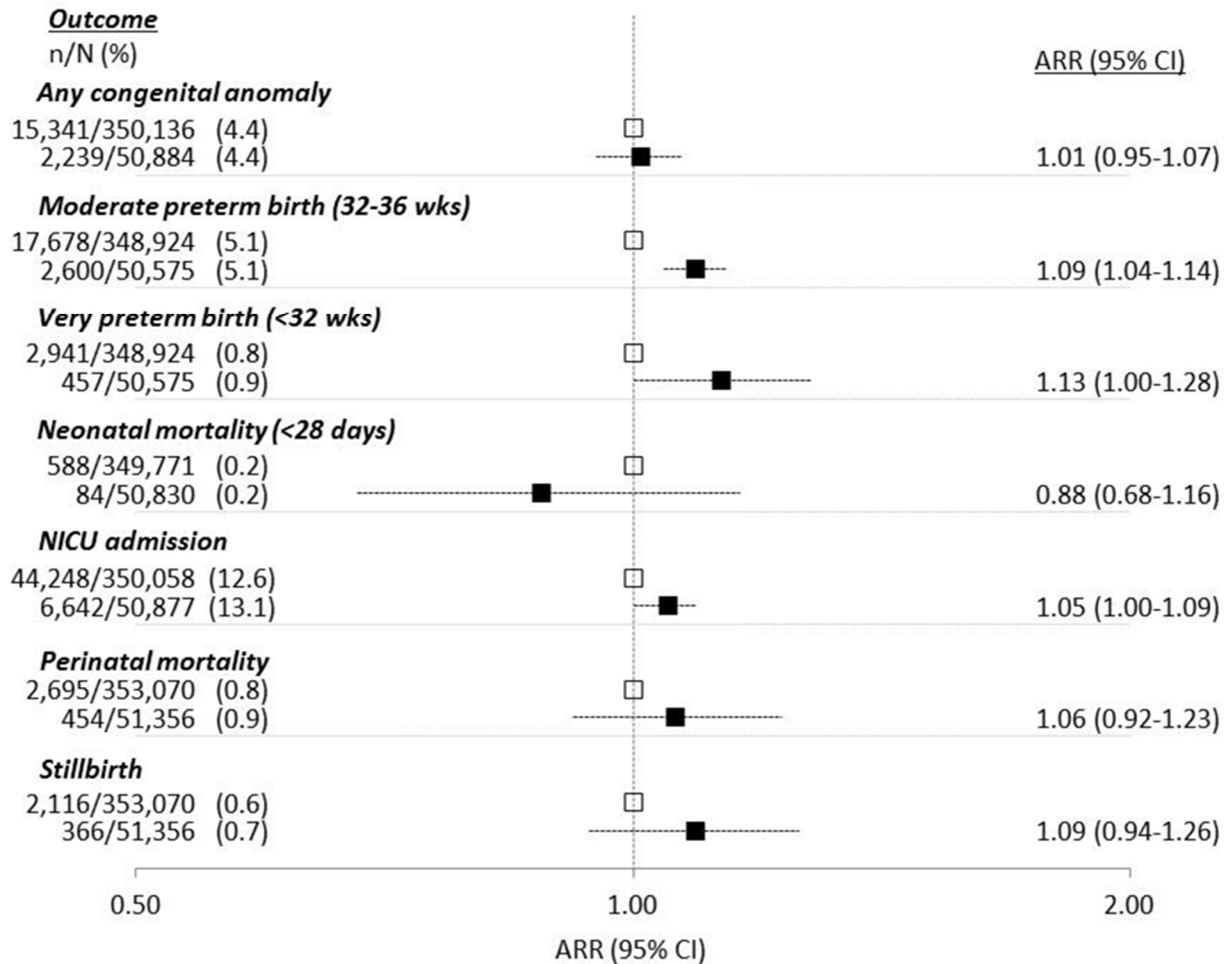

ARR – adjusted risk ratio; CI – confidence interval; NICU – neonatal intensive care unit

\*Estimated using log-binomial regression with generalized estimating equations to account for potential correlation among mothers from the same country of birth.

**STROBE 2007 (v4) Statement—Checklist of items that should be included in reports of *cohort studies***

| Section/Topic                | Item # | Recommendation                                                                                                                                                                       | Reported on page # |
|------------------------------|--------|--------------------------------------------------------------------------------------------------------------------------------------------------------------------------------------|--------------------|
| Title and abstract           | 1      | (a) Indicate the study's design with a commonly used term in the title or the abstract                                                                                               | 1                  |
|                              |        | (b) Provide in the abstract an informative and balanced summary of what was done and what was found                                                                                  | 2                  |
| <b>Introduction</b>          |        |                                                                                                                                                                                      |                    |
| Background/rationale         | 2      | Explain the scientific background and rationale for the investigation being reported                                                                                                 | 3                  |
| Objectives                   | 3      | State specific objectives, including any prespecified hypotheses                                                                                                                     | 3                  |
| <b>Methods</b>               |        |                                                                                                                                                                                      |                    |
| Study design                 | 4      | Present key elements of study design early in the paper                                                                                                                              | 3                  |
| Setting                      | 5      | Describe the setting, locations, and relevant dates, including periods of recruitment, exposure, follow-up, and data collection                                                      | 3-5                |
| Participants                 | 6      | (a) Give the eligibility criteria, and the sources and methods of selection of participants. Describe methods of follow-up                                                           | 3-4                |
|                              |        | (b) For matched studies, give matching criteria and number of exposed and unexposed                                                                                                  | 6                  |
| Variables                    | 7      | Clearly define all outcomes, exposures, predictors, potential confounders, and effect modifiers. Give diagnostic criteria, if applicable                                             | 4-6                |
| Data sources/<br>measurement | 8*     | For each variable of interest, give sources of data and details of methods of assessment (measurement). Describe comparability of assessment methods if there is more than one group | 4-5                |
| Bias                         | 9      | Describe any efforts to address potential sources of bias                                                                                                                            | 5,6                |
| Study size                   | 10     | Explain how the study size was arrived at                                                                                                                                            | 4                  |
| Quantitative variables       | 11     | Explain how quantitative variables were handled in the analyses. If applicable, describe which groupings were chosen and why                                                         | 6                  |
| Statistical methods          | 12     | (a) Describe all statistical methods, including those used to control for confounding                                                                                                | 6                  |
|                              |        | (b) Describe any methods used to examine subgroups and interactions                                                                                                                  | 6                  |
|                              |        | (c) Explain how missing data were addressed                                                                                                                                          | 6                  |
|                              |        | (d) If applicable, explain how loss to follow-up was addressed                                                                                                                       | n/a                |
|                              |        | (e) Describe any sensitivity analyses                                                                                                                                                |                    |
| <b>Results</b>               |        |                                                                                                                                                                                      |                    |

|                          |     |                                                                                                                                                                                                              |                                                                                                     |
|--------------------------|-----|--------------------------------------------------------------------------------------------------------------------------------------------------------------------------------------------------------------|-----------------------------------------------------------------------------------------------------|
| Participants             | 13* | (a) Report numbers of individuals at each stage of study—eg numbers potentially eligible, examined for eligibility, confirmed eligible, included in the study, completing follow-up, and analysed            | n/a                                                                                                 |
|                          |     | (b) Give reasons for non-participation at each stage                                                                                                                                                         | n/a                                                                                                 |
|                          |     | (c) Consider use of a flow diagram                                                                                                                                                                           |                                                                                                     |
| Descriptive data         | 14* | (a) Give characteristics of study participants (eg demographic, clinical, social) and information on exposures and potential confounders                                                                     | Page 16- Table 1                                                                                    |
|                          |     | (b) Indicate number of participants with missing data for each variable of interest                                                                                                                          | Page 16- Table 1                                                                                    |
|                          |     | (c) Summarise follow-up time (eg, average and total amount)                                                                                                                                                  | n/a                                                                                                 |
| Outcome data             | 15* | Report numbers of outcome events or summary measures over time                                                                                                                                               | All figures                                                                                         |
| Main results             | 16  | (a) Give unadjusted estimates and, if applicable, confounder-adjusted estimates and their precision (eg, 95% confidence interval). Make clear which confounders were adjusted for and why they were included | Unadjusted figures in supplementary tables S2 and S3. Confounder adjusted estimates in all figures. |
|                          |     | (b) Report category boundaries when continuous variables were categorized                                                                                                                                    | Not applicable                                                                                      |
|                          |     | (c) If relevant, consider translating estimates of relative risk into absolute risk for a meaningful time period                                                                                             | Not relevant                                                                                        |
| Other analyses           | 17  | Report other analyses done—eg analyses of subgroups and interactions, and sensitivity analyses                                                                                                               | 8-9                                                                                                 |
| <b>Discussion</b>        |     |                                                                                                                                                                                                              |                                                                                                     |
| Key results              | 18  | Summarise key results with reference to study objectives                                                                                                                                                     | 7                                                                                                   |
| <b>Limitations</b>       |     |                                                                                                                                                                                                              |                                                                                                     |
| Interpretation           | 20  | Give a cautious overall interpretation of results considering objectives, limitations, multiplicity of analyses, results from similar studies, and other relevant evidence                                   | 7-8                                                                                                 |
| Generalisability         | 21  | Discuss the generalisability (external validity) of the study results                                                                                                                                        | 9                                                                                                   |
| <b>Other information</b> |     |                                                                                                                                                                                                              |                                                                                                     |
| Funding                  | 22  | Give the source of funding and the role of the funders for the present study and, if applicable, for the original study on which the present article is based                                                | 15                                                                                                  |

\*Give information separately for cases and controls in case-control studies and, if applicable, for exposed and unexposed groups in cohort and cross-sectional studies.

1  
2  
3  
4 **Note:** An Explanation and Elaboration article discusses each checklist item and gives methodological background and published examples of transparent reporting. The STROBE  
5 checklist is best used in conjunction with this article (freely available on the Web sites of PLoS Medicine at <http://www.plosmedicine.org/>, Annals of Internal Medicine at  
6 <http://www.annals.org/>, and Epidemiology at <http://www.epidem.com/>). Information on the STROBE Initiative is available at [www.strobe-statement.org](http://www.strobe-statement.org).  
7  
8  
9  
10  
11  
12  
13  
14  
15  
16  
17  
18  
19  
20  
21  
22  
23  
24  
25  
26  
27  
28  
29  
30  
31  
32  
33  
34  
35  
36  
37  
38  
39  
40  
41  
42  
43  
44  
45  
46  
47

For peer review only

# BMJ Open

## Refugee maternal and perinatal health in Ontario, Canada: a retrospective population-based study

|                                 |                                                                                                                                                                                                                                                                                                                                                                                                                                                                                                                                                                                                                                                                                                                                                                                                                                                   |
|---------------------------------|---------------------------------------------------------------------------------------------------------------------------------------------------------------------------------------------------------------------------------------------------------------------------------------------------------------------------------------------------------------------------------------------------------------------------------------------------------------------------------------------------------------------------------------------------------------------------------------------------------------------------------------------------------------------------------------------------------------------------------------------------------------------------------------------------------------------------------------------------|
| Journal:                        | <i>BMJ Open</i>                                                                                                                                                                                                                                                                                                                                                                                                                                                                                                                                                                                                                                                                                                                                                                                                                                   |
| Manuscript ID                   | bmjopen-2017-018979.R2                                                                                                                                                                                                                                                                                                                                                                                                                                                                                                                                                                                                                                                                                                                                                                                                                            |
| Article Type:                   | Research                                                                                                                                                                                                                                                                                                                                                                                                                                                                                                                                                                                                                                                                                                                                                                                                                                          |
| Date Submitted by the Author:   | 30-Jan-2018                                                                                                                                                                                                                                                                                                                                                                                                                                                                                                                                                                                                                                                                                                                                                                                                                                       |
| Complete List of Authors:       | Wanigaratne, Susitha; St. Michael's Hospital, Centre for Urban Health Solutions; Institute for Clinical Evaluative Sciences<br>Shakya, Yogendra; 4. Access Alliance Multicultural Health and Community Services; University of Toronto, Dalla Lana School of Public Health<br>Gagnon, Anita; McGill University<br>Cole, Donald; University of Toronto, Dalla Lana School of Public Health<br>Rashid, Meb; Women's College Hospital<br>Blake, Jennifer; Society of Obstetricians and Gynaecologists of Canada<br>Dastoori, Parisa; St. Michael's Hospital<br>Moineddin, Rahim; University of Toronto, Family and Community Medicine<br>Ray, Joel; St. Michael's Hospital, Keenan Research Centre; University of Toronto, Departments of Medicine and Obstetrics and Gynaecology<br>Urquia, Marcelo; University of Manitoba; St. Michael's Hospital |
| <b>Primary Subject Heading</b>: | Public health                                                                                                                                                                                                                                                                                                                                                                                                                                                                                                                                                                                                                                                                                                                                                                                                                                     |
| Secondary Subject Heading:      | Epidemiology, Obstetrics and gynaecology                                                                                                                                                                                                                                                                                                                                                                                                                                                                                                                                                                                                                                                                                                                                                                                                          |
| Keywords:                       | EPIDEMIOLOGY, Maternal medicine < OBSTETRICS, PERINATOLOGY, PUBLIC HEALTH, SOCIAL MEDICINE                                                                                                                                                                                                                                                                                                                                                                                                                                                                                                                                                                                                                                                                                                                                                        |
|                                 |                                                                                                                                                                                                                                                                                                                                                                                                                                                                                                                                                                                                                                                                                                                                                                                                                                                   |

SCHOLARONE™  
Manuscripts



## Refugee maternal and perinatal health in Ontario, Canada: a retrospective population-based study

Susitha Wanigaratne<sup>1,2</sup>, Yogendra Shakya<sup>3,4</sup>, Anita Gagnon<sup>5</sup>, Donald C. Cole<sup>4</sup>, Meb Rashid<sup>6</sup>, Jennifer Blake<sup>7</sup>, Parisa Dastoori<sup>1,3</sup>, Rahim Moineddin<sup>8</sup>, Joel G. Ray<sup>2,9,10</sup>, Marcelo L. Urquia<sup>1,2,4,11</sup>

<sup>1</sup> Centre for Urban Health Solutions, St. Michael's Hospital, Toronto, Ontario, Canada

<sup>2</sup> Institute for Clinical Evaluative Sciences, Sunnybrook Health Sciences Centre, Toronto, Ontario, Canada,

<sup>3</sup> Access Alliance Multicultural Health and Community Services, Toronto, Ontario, Canada,

<sup>4</sup> Dalla Lana School of Public Health, University of Toronto, Toronto, Ontario, Canada,

<sup>5</sup> Ingram School of Nursing, McGill University, Montreal, Quebec, Canada

<sup>6</sup> Crossroads Medical Clinic, Women's College Hospital, Toronto, Ontario, Canada,

<sup>7</sup> Society of Obstetricians and Gynaecologists of Canada, Ottawa, Ontario, Canada

<sup>8</sup> Department of Family and Community Medicine, University of Toronto, Toronto, Ontario, Canada,

<sup>9</sup> Keenan Research Centre, St. Michael's Hospital, Toronto, Ontario, Canada,

<sup>10</sup> Departments of Medicine and Obstetrics and Gynaecology, University of Toronto, Toronto, Ontario, Canada,

<sup>11</sup> Manitoba Centre for Health Policy, University of Manitoba, Winnipeg, Manitoba, Canada

Correspondence to

Dr. Susitha Wanigaratne; [wanigaratnes@smh.ca](mailto:wanigaratnes@smh.ca)

## Abstract

Objectives: Immigrants are thought to be healthier than their native-born counterparts, but less is known about the health of refugees or forced migrants. Previous studies often equate refugee status with immigration status or country of birth (COB) and none have compared refugee to non-refugee immigrants from the same COB. Herein, we examined whether: i) a refugee mother experiences greater odds of adverse maternal and perinatal health outcomes compared to a similar non-refugee mother from the same COB, and ii) refugee and non-refugee immigrants differ from Canadian-born mothers for maternal and perinatal outcomes.

Design: This is a retrospective population-based database study. We implemented two cohort designs: i) 1:1 matching of refugees to non-refugee immigrants on COB, year and age at arrival (+/- 5 years) and ii) an unmatched design using all data.

Setting and participants: Refugee immigrant mothers (N=34,233), non-refugee immigrant mothers (N=243,439) and Canadian-born mothers (N=615,394) eligible for universal health care insurance who had a hospital birth in Ontario, Canada between 2002 and 2014.

Primary outcomes: Numerous adverse maternal and perinatal health outcomes.

Results: Refugees differed from non-refugee immigrants most notably for HIV, with respective rates of 0.39% and 0.20% and an adjusted odds ratio (AOR) of 1.82 (95% confidence intervals [CI] 1.19-2.79). Other elevated outcomes included caesarean section (AOR 1.04, 95% 1.00-1.08) and moderate preterm birth (AOR 1.08, 95% CI 0.99-1.17). For the majority of outcomes, refugee and non-refugee immigrants experienced similar AORs when compared with Canadian-born mothers.

Conclusions: Refugee status was associated with a few adverse maternal and perinatal health outcomes but the associations were not strong except for HIV. The definition of refugee status used herein may not sensitively identify refugees at highest risk. Future research would benefit from further refining refugee status based on migration experiences.

### Strengths and limitations of this study

- This is a retrospective population-based cohort study from Ontario, Canada linking official permanent resident immigration, hospital and physician billing data to compare births between 2002 and 2014 from refugee mothers (N=34,233) to both non-refugee immigrant mothers (N=243,439) and Canadian-born mothers (N=615,394).
- This is the first study to match refugee immigrant to non-refugee immigrant mothers on country of birth, year and age at arrival; making it possible to explicitly determine whether refugee status confers greater risk of adverse outcomes among two otherwise very similar mothers.
- This is one of the largest studies of refugee maternal and perinatal health in the literature.
- The administrative definition of refugee status used in this study may not be sensitive enough to identify refugees with greater health risks or greater health care needs.

## Introduction

Refugees are considered an extremely vulnerable group for adverse health outcomes.[1] Canada, and other signatories to the United Nations (UN) Convention Relating to the Status of Refugees, define refugees as persons who fear persecution or violence because of their race, religion, nationality or political views and are forced to flee their home countries.[2] In Canada 10% of the 250,000 immigrants who become permanent residents each year are admitted as refugees.[3] Most non-refugee permanent residents are selected based on high levels of education, official language fluency, and work experience or are related to a permanent resident or Canadian citizen. This is in contrast to refugees who are either chosen based on vulnerability by the UN High Commissioner for Refugees (UNHCR) or, claim refugee status upon arrival and have the claim accepted by an independent tribunal.[4]

Given differing exposures in: countries of origin (e.g., conflict), transition countries (e.g., poor access to health services), post-migration exposures (e.g., discrimination); and receiving country immigration policies, the maternal and perinatal health of refugees may differ from their non-refugee immigrant counterparts.[5,6]

Few refugee maternal and perinatal health studies in Canada [5–8] or in other countries [9] compare refugees to non-refugee immigrants. Many studies use a native-born comparator and attribute excess risk to refugee status even though a non-refugee immigrant comparator is absent [10–15]. In addition, many studies rely on country of birth as an indicator of refugee migration [11–18] rather than identifying refugees based on their legal status or migration history. These details are critical, since specialized maternal and perinatal health care tailored to refugees cannot be effectively justified if a “refugee effect” cannot be differentiated from an “immigrant effect” or “country effect”. In addition, research often finds that immigrants are healthier than the native-born population, the so-called “healthy migrant effect”[19]. However, the effect may not apply to refugees given their differential exposure to health risks prior to arrival (as described above). Studies are mixed as to whether the healthy migrant effect applies to refugee maternal and perinatal health.[5,6,12]

Given this background our first objective was to determine whether a refugee immigrant mother experiences greater odds of adverse maternal and perinatal health outcomes compared to a similar non-refugee immigrant mother from the same country of birth. Secondary analyses focused on the top 5 refugee source countries (Sri Lanka, Somalia, Afghanistan, Iran, and China). Secondly, we compared maternal and perinatal health outcomes among refugee and non-refugee immigrant mothers to Canadian-born mothers to examine whether the healthy migrant effect applies to both refugee and non-refugee immigrants. This study used population-based administrative health care and immigration data from Ontario, the province which receives about half of all refugees arriving to Canada [3].

## Methods

### *Study Design and Inclusion/Exclusion Criteria*

This retrospective population-based database study included all Ontario hospital childbirth admissions occurring between April 1, 2002 and March 31, 2014. A matched cohort design was used to isolate the excess risk conferred by refugee status beyond that of immigration and country of birth, while a non-matched cohort design used all available data to compare outcomes of refugee and non-refugee immigrants to Canadian-born mothers. Births to refugee and non-refugee immigrant mothers were identified retrospectively through linkage of hospital admissions to the Immigration and Refugees Citizenship Canada Permanent Resident Database (IRCC-PRD). The cost of health care services was not a barrier to accessing care since all mothers were eligible for universal, publicly funded health care insurance. Births not linked to the IRCC-PRD were attributed to *Canadian-born mothers* (Indigenous mothers could not be excluded at the time of the linkage). We reduced the bias attributed to unlinked migrant mothers among Canadian-born mothers by further restricting to mothers who: i) became

1  
2  
3 eligible for provincial health care insurance on or before 1990 (the first year insurance eligibility was  
4 recorded – those eligible prior to 1990 were given an eligibility start year of 1990) and less likely to be  
5 immigrants; ii) were born in an Ontario hospital after 1991 (the first year births were available in  
6 hospital data) or; iii) became eligible for provincial health care insurance within 1 year of their year of  
7 birth and therefore lived in Ontario from a very young age.

8  
9 For maternal outcomes, the unit of analysis was the delivery episode, where multiple births were  
10 counted as a single delivery. For all perinatal outcomes, the unit of analysis was restricted to singletons.  
11 Since many of the outcomes in this study are commonly used in epidemiologic surveillance,  
12 specifications based on gestational age and/or birthweight used by the Canadian Perinatal Surveillance  
13 System [20] were implemented where possible. These specifications relate to including births that are  
14 reasonably expected to be at risk for the outcome; births < 500 grams and/or <20 weeks gestation are  
15 less likely to be viable. The populations were as follows: for preterm birth (PTB) live births between 22-  
16 41 weeks gestational age (GA) and a birth weight (BWT) of  $\geq 500$  grams (g); neonatal intensive care  
17 (NICU) admission - live births with GA  $\geq 20$  weeks or a BWT  $\geq 500$  g; neonatal mortality - live births with a  
18 BWT  $\geq 500$  g; any congenital anomaly - stillbirths and live births with a GA  $\geq 20$  weeks or a BWT  $\geq 500$  g;  
19 stillbirth - GA  $\geq 20$  weeks or a BWT  $\geq 500$  g; perinatal mortality - stillbirths and live births with a GA  $\geq 20$   
20 weeks or a BWT  $\geq 500$  g.  
21  
22

### 23 Data Sources

24 We linked five administrative databases held at the Institute for Clinical and Evaluative Sciences  
25 (ICES) in Toronto, Ontario. These datasets were linked using unique encoded identifiers (i.e., encrypted  
26 health care number) and analyzed at ICES.  
27

28 The Immigration and Refugees Citizenship Canada Permanent Resident Database (IRCC-PRD) is  
29 administered by the Canadian government and used for legal purposes. The Ontario portion of this  
30 dataset contains information on all international migrants successful in obtaining permanent residency  
31 between 1985 and 2012. The IRCC-PRD contained <1% of missing values for all variables. Linkage  
32 between the IRCC-PRD and Ontario's health care registry was necessary to assign each individual in the  
33 IRCC-PRD their unique encrypted health care number since this facilitated deterministic linkage to the  
34 health care databases used to identify outcomes of interest. Ontario's health care registry consists of all  
35 persons eligible for publicly funded health care insurance in the province of Ontario between April 1,  
36 1990 and March 31, 2014. The health care registry contains encrypted unique health care numbers and  
37 other personal identifiers. A detailed explanation of the process used to link the IRCC-PRD and Ontario's  
38 health care registry can be found elsewhere [21]. In summary, deterministic linkage was undertaken first  
39 using several personal identifiers (i.e., sex, last name, given name, birth date) resulting in a 68.2%  
40 deterministic linkage rate. Unmatched records were then submitted to a probabilistic and manual  
41 review process which resulted in an additional 18.2% of records being linked (13.6% remained unlinked).  
42 Bias in the linkage process was investigated by comparing immigration variables between matched and  
43 unmatched individuals and little bias was detected.[21]  
44  
45

46 Childbirth records were obtained from the Discharge Abstract Database originating from the  
47 Canadian Institute of Health Information. Diagnosis and procedure codes using the 10th revision of the  
48 *International Statistical Classification of Diseases and Related Health Problems*, Canadian enhancement,  
49 and *Canadian Classification of Health Interventions* (ICD-10-CA/CCI) identified women with all maternal  
50 or perinatal outcomes except early neonatal and neonatal mortality. A validation study supported the  
51 use of this database for perinatal research.[22] This dataset also contains information on maternal age  
52 at the time of delivery, self-reported parity and birth plurality.  
53

54 The Office of the Registrar General's Vital Statistics-Death registry was used to identify early  
55 neonatal mortality (0-7 days of life) and neonatal mortality (0-28 days of life) between 2002 and 2012.  
56 96.2% of records in the Vital Statistics Registry were successfully linked to the health care registry and  
57

1  
2  
3 little bias in the linkage was detected.[21] However, individuals between the ages of 0 and 14 years  
4 were more likely to be unlinked. Vital Statistics data were supplemented by mortality recorded in the  
5 health care registry and other administrative health care databases, however early neonatal deaths may  
6 also be missing in the health care registry because health care numbers may not have been issued.[21]

7 The Ontario HIV Database (1992-2014) uses an algorithm consisting of at least three physician HIV  
8 diagnoses in a 3-year period to identify HIV positive persons. The algorithm demonstrated 96.2%  
9 sensitivity and 99.6% specificity when compared to patient charts.[23] HIV diagnoses were restricted to  
10 women diagnosed prior to child birth.  
11

### 12 13 *Variables*

14 Refugee status was defined using the IRCC-PRD. There are four categories of refugees in the  
15 database – i) government sponsored refugees, who are provided with financial and settlement  
16 assistance during their 1st year in Canada by the federal government; ii) privately sponsored refugees,  
17 who are provided with financial and settlement assistance during their 1<sup>st</sup> year in Canada by a group of  
18 Canadians; iii) refugee claimants, who arrive to Canada unsupported and make a legal claim to refugee  
19 status; and iv) refugees who are dependents of a primary refugee applicant. Prior to arrival, the two  
20 groups of sponsored refugees were registered with the UN High Commissioner for Refugees (UNHCR)  
21 and are chosen for immigration to Canada based on vulnerability. Sponsored refugees become  
22 permanent residents and are eligible for provincial health care upon arrival to Canada. Non-sponsored  
23 refugees (i.e., refugee claimants) [4,24] are eligible for federally funded health care (administered by the  
24 provinces) while they wait for their refugee determination hearing. The proportion of refugee claims  
25 approved during the time span of the IRCC-PRD is unknown but recent data indicate approvals have  
26 risen from 38.1% in 2013 to 66.1% in 2016 [25]. Successful refugee claimants, who make up the  
27 remaining 50% of permanent residents who are refugees, become eligible for permanent residency and  
28 for provincial health care once their claim is approved. Unsuccessful refugee claimants are not included  
29 in the IRCC-PRD.  
30

31 Non-refugee immigrants in the IRCC-PRD are predominately skilled immigrants or their family  
32 members. Skilled immigrants are selected based on high levels of education, official language fluency,  
33 and work experience. Family class immigrants must be related to a permanent resident or Canadian  
34 citizen able to provide financial support. Soon after arrival in Canada both groups become permanent  
35 residents and are eligible for universal, provincially funded health care.  
36

37 All immigrants in the IRCC-PRD were subject to an immigration medical exam (IME) during the  
38 application process. Prior to 2002 immigration applicants could be rejected if they placed “excessive  
39 demand” on health and social services [26]. However, in 2002 the Immigration & Refugee Protection Act  
40 (IRPA) [27] came into effect which changed this “excessive demand” criteria so it only applied to skilled  
41 immigrants and not family class immigrants or refugees.  
42

43 Canadian-born women are described above (under “Study Design and Inclusion/Exclusion Criteria”).  
44

45 We examined several maternal and perinatal health outcomes (see Supplementary Table S1 for  
46 codes). Severe maternal morbidity (SMM), was evaluated using a composite surveillance indicator  
47 [28,29] developed by the Canadian Perinatal Health Surveillance System. A woman had SMM if she had  
48 one or more of forty-five ICD-10-CA/CCI diagnoses or procedures reported during hospital admission for  
49 labour or delivery.[28] Other maternal health outcomes, documented at the time of delivery, were:  
50 complicated urinary tract infection (UTI), pre-existing hypertension, gestational hypertension,  
51 preeclampsia, eclampsia, pre-pregnancy diabetes, gestational diabetes mellitus (GDM), caesarean  
52 section, post-partum hemorrhage (PPH) and maternal intensive care unit (ICU) admission. Perinatal  
53 outcomes, documented at birth, included: any congenital anomaly, moderate preterm birth (moderate  
54 PTB) (32-36 weeks gestation), very preterm birth (very PTB) (< 32 weeks gestation), neonatal ICU (NICU)  
55 admission and stillbirth. Measurement of early neonatal mortality (0-7 days of life) and neonatal  
56  
57

1  
2  
3 mortality (0-28 days of life) were not restricted to the hospital delivery admission. Information from  
4 both the ORGD and the RPDB were combined to identify early neonatal and neonatal mortality. Early  
5 neonatal mortality was combined with information on stillbirth to identify perinatal mortality.

6 Potential confounders were identified *a priori*. Some control variables were available for all births,  
7 including maternal age at delivery (15-19, 20-24, 25-29, 30-34, 35-39, 40+ years), neighborhood income  
8 quintile, parity (0, 1, 2 or  $\geq 3$  previous births) and plurality. Other control variables were only available  
9 for refugees and non-refugee immigrants since this information was collected in the IRCC-PRD. These  
10 included: maternal country of birth (COB); COBs categorized into world regions and sub-regions  
11 according to the UN classification system with a modification to the developed countries classification  
12 [30]; year of arrival (5-year categories); age at arrival (5-year categories); maternal education at arrival  
13 (0-9 years, 10-12 years, 13+ years, trade certificate/non-university diploma, University degree);  
14 knowledge of official Canadian languages at arrival (English and/or French or neither); and duration of  
15 residence in Canada, defined as the time (in years) elapsed between the date of becoming a permanent  
16 resident and the date of delivery.

### 19 Analysis

20 Births with missing data for any control variable were excluded. To estimate whether refugee  
21 status increases the odds of adverse outcomes between a refugee mother and a non-refugee mother  
22 with similar pre-migration circumstances (objective 1), we 1:1 matched first births in Canada among  
23 refugees to non-refugee immigrants on COB, year of arrival (+/- 5 years) and age at arrival (+/- 5 years).  
24 Analyses were restricted to the first delivery in the hospitalization database to prevent matching several  
25 births from a single refugee mother to births to more than one non-refugee immigrant mother. We  
26 conducted a matched pair analysis using conditional logistic regression. In secondary analyses focusing  
27 on refugee and non-refugee immigrants from each of the top 5 refugee source countries of birth, all  
28 births were included and analyzed with logistic regression. All the above models were adjusted for  
29 maternal age at delivery, parity, neighborhood income, education at arrival, knowledge of official  
30 languages at arrival and duration of residence in Canada. In a sensitivity analysis, all births to refugee  
31 mothers were compared to all births to non-refugee mothers using logistic regression with Generalized  
32 Estimating Equations (GEE) to account for the non-independence of the outcome among mothers from  
33 the same COB.

34 To compare refugee and non-refugee mothers to Canadian-born mothers all births were included  
35 and logistic regression with GEE were used to account for non-independence of the outcome among  
36 births to the same mother. Fewer variables were available for Canadian-born women so models were  
37 adjusted for maternal age at delivery, parity and neighborhood income.

### 42 Research Ethics

43 This study was approved by the institutional review board at Sunnybrook Health Sciences  
44 Centre, and the ethics review board of St. Michael's Hospital, Toronto, Canada.

### 47 Results

48 Table 1 summarizes the characteristics of refugee immigrant mothers (N=34,233), non-refugee  
49 immigrant mothers (N=243,439) and Canadian-born mothers (N=615,394). Refugee mothers had 52,360  
50 births in Ontario, non-refugee immigrant mothers had 360,007 births and Canadian mothers had  
51 977,045 births. More refugee mothers (10%) had high parity ( $\geq 3$  previous births) compared to both non-  
52 refugee immigrant (3.2%) and Canadian-born mothers (2.7%) at the first birth in Ontario. A greater  
53 proportion of refugees had less than 13 years of education at arrival (72.6%) compared to non-refugee  
54 immigrants (43.0%). There were about 5 times as many refugee mothers from Sub-Saharan Africa  
55 compared to non-refugee immigrant mothers (22.8% and 4.8%, respectively).

Eighty-five percent of refugee mothers (N= 29,023) were successfully matched to a non-refugee mother on country of birth, and year and age at arrival (+/- 5 years). For most outcomes, differences between matched refugees and non-refugees were non-significant (see Figures 1 and 2). Caesarean section (adjusted odds ratio [AOR]=1.04 95% CI 1.00-1.08) and HIV (AOR=1.82 95% CI 1.19-2.79) were significantly higher among refugees. Moderate PTB approached statistical significance (AOR=1.08, 95% CI 0.99-1.17). See Supplementary Table S2 for unadjusted results.

Supplementary Figures (S1a/b through S5a/5b) disaggregate results according to the top 5 refugee source countries to Ontario – Sri Lanka, Somalia, Afghanistan, Iraq and China. Afghan and Iraqi refugees had higher odds of caesarean section. Refugee mothers from all countries either had significantly greater odds of GDM (Afghanistan AOR=1.29 95% CI 1.09-1.54) or borderline greater odds of GDM (Sri Lanka AOR=1.09 95% CI 0.99-1.21; Somalia AOR=1.20 95% CI 0.98-1.48; Iraq AOR=1.22 95% CI 0.99-1.50; China AOR=1.16 95% CI 0.98-1.37) compared to their non-refugee counterparts.

Figures 3 and 4 compare both refugees to Canadian-born mothers and non-refugee immigrants to Canadian-born mothers. Other than severe maternal morbidity (SMM) and HIV, the two sets of AORs comparing refugees to Canadian-born mothers and non-refugees to Canadian-born mothers were in the same direction and of a similar magnitude. With respect to SMM (see Figure 3), refugees had significantly higher odds compared to Canadian-born mothers while non-refugee immigrant mothers had significantly lower odds. However, after HIV was removed from the SMM index, refugees experienced similar odds of SMM to Canadian-born mothers. For other maternal outcomes (Figure 3), both refugees and non-refugees compared to Canadian-born mothers had: *significantly lower odds* of complicated UTI, pre-existing hypertension, gestational hypertension, preeclampsia, eclampsia, pre-pregnancy diabetes, and PPH; and *significantly higher odds* of caesarean section, GDM, maternal ICU admission and HIV. In terms of perinatal outcomes (Figure 4), both refugees and non-refugees compared to Canadian-born mothers had: *significantly lower odds* of any congenital anomaly and moderate PTB; similar odds of very PTB and neonatal mortality; and *significantly higher odds* of NICU admission, perinatal mortality and stillbirth. See Supplementary Table S3 for unadjusted results.

## Discussion

We found modest increased odds of cesarean section and moderate PTB among refugee compared to non-refugee mothers from the same COB. HIV was the exception with a much greater prevalence. Overall, our findings suggest that refugee status, measured with an administrative definition, is not a strong risk indicator for poor maternal and perinatal health. In addition, we found that refugee and non-refugee mothers experienced a similar magnitude of odds ratios for almost all outcomes when each group was separately compared to Canadian-born mothers. About one third of outcomes were significantly worse among refugee and non-refugee immigrant mothers when compared to Canadian-born mothers.

The SMM and HIV findings are explained in detail in a previous report of ours [5] (although unmatched on country of birth). Our current results are consistent with the previous study however with smaller HIV prevalence ratios. The smaller prevalence ratio can likely be explained by the different method used to capture HIV diagnoses (hospital discharge data in the previous study and HIV physician diagnoses data in the current study) but also because 1:1 matching of refugee to non-refugee immigrants on country of birth, year and age at arrival in the current study accounted for some of the difference between refugee and non-refugee immigrants. In our previous work we found that refugee mothers with HIV did not have any greater maternal morbidity compared to non-refugee immigrant or Canadian-born mothers with HIV, suggesting that HIV during pregnancy is well-managed in Ontario regardless of refugee status (with permanent residency). In contrast, a Dutch study [9] describes HIV as a risk indicator for severe acute maternal morbidity among asylum-seekers (refugees without permanent residency); suggesting that a lack of appropriate HIV care may be contributing to SAMM.

1  
2  
3  
4  
5  
6  
7  
8  
9  
10  
11  
12  
13  
14  
15  
16  
17  
18  
19  
20  
21  
22  
23  
24  
25  
26  
27  
28  
29  
30  
31  
32  
33  
34  
35  
36  
37  
38  
39  
40  
41  
42  
43  
44  
45  
46  
47  
48  
49  
50  
51  
52  
53  
54  
55  
56  
57  
58  
59  
60

Refugee mothers were 4% more likely to have a caesarean section compared their non-refugee counterparts while Afghan and Iraqi refugee mothers were ~30% more likely to experience caesarean section than their same-country non-refugee counterparts. A study involving 10 Canadian hospitals [31] found a significant difference between refugee, asylum-seeker and non-refugee immigrants from South-East and Central Asia. Reasons for the higher caesarean rate among refugees were: higher parity, medical complications, low socio-economic status, socio-cultural factors and sub-optimal perinatal care.[31]

Refugee status was also positively associated with moderate PTB and with gestational diabetes among mothers from the top 5 refugee-receiving countries. The relationship between refugee status and gestational diabetes may be explained by a study which found stressful events were associated with 2.5 times greater risk of gestational diabetes.[32] Other research suggests maternal chronic stress is an important risk factor for PTB,[33] particularly among socially disadvantaged populations.[34] Previously published research of ours found that the effect of refugee status on PTB was stronger among refugee mothers who resided in a transition country prior to arriving in Canada [7] with potentially greater exposure to psychosocial stress. The hypothesized physiological mechanism connecting psychosocial stress to both gestational diabetes and PTB involves dysfunction of regulatory hormones in the body—insulin resistance or impaired insulin metabolism leading to gestational diabetes [32] and early release of hormones required for the initiation of labour leading to PTB.[33]

The extent to which refugee and non-refugee immigrants experienced the “healthy migrant effect” (HME) (relative to Canadian-born mothers) for all maternal and perinatal health outcomes was identical. We found that both refugee and non-refugee immigrants experienced higher odds of the same adverse maternal and perinatal health outcomes (1/3 of all outcomes examined) compared to Canadian-born mothers. This suggests that refugee status, using an administrative definition of refugees, is not an important factor in the HME for these outcomes. These findings are also consistent with others who have stated that the HME is not evident for all health outcomes.[35]

### *Strengths and Limitations*

Among studies examining refugee maternal and perinatal health [5–18,36–47], our study has several unique and important strengths. Firstly, our study used official government immigration data to identify women who met the UNHCR definition of a refugee rather than relying on country of birth (COB) as an indicator of refugee status, as many previous studies have done.[11–18] Secondly, we matched refugee and non-refugee immigrant women on country of birth, as well as year and age at arrival (see Supplementary Figures S6 & S7 for unmatched results). By matching on these variables, ours is the first study to effectively address the question of whether refugee status among two otherwise similar immigrant mothers, is a risk indicator for adverse maternal and perinatal outcomes. Thirdly, to our knowledge our study includes the largest sample of mothers legally classified as refugees reported in the literature contributing to adequate statistical power for our main analyses (objectives 1 and 2).

This study is not without limitations. In our main analysis, we matched 85% of refugee mothers to one non-refugee immigrant mother. To ensure that the results of the matched sample were not biased, a sensitivity analysis was conducted where the refugees and non-refugees unmatched on country of birth were matched instead by sub-region of birth (e.g., East Africa) as well as year and age at arrival. With this second round of matching, 99% of all refugee mothers were matched to a non-refugee mother either on country or sub-region of birth. Analysis of this twice-matched cohort yielded very similar odds ratios to those of the first match. Given that the results were similar, and that the first match most effectively tells us whether refugee status among immigrant mothers with a similar pre-migration context increases risk of adverse outcomes, we chose to present results from only the first match.



1  
2  
3  
4  
5  
6  
7  
8  
9  
10  
11  
12  
13  
14  
15  
16  
17  
18  
19  
20  
21  
22  
23  
24  
25  
26  
27  
28  
29  
30  
31  
32  
33  
34  
35  
36  
37  
38  
39  
40  
41  
42  
43  
44  
45  
46  
47  
48  
49  
50  
51  
52  
53  
54  
55  
56  
57  
58  
59  
60

Other limitations are as follows. Firstly, the “refugee experience” as it pertains to health risks may not be consistent with the legally applied definition of “refugee”. Risk factors for adverse outcomes (i.e., exposure to violence, forced family separation) are context dependent, such as the length of time in the migration phase and access to health and other supportive services before and during migration - factors for which we did not have data. We addressed context by matching refugees to non-refugees on COB, year and age at arrival as well as restricting analyses to the top 5 refugee-source countries; however even within these COBs there is likely important heterogeneity which we could not examine or account for. A second limitation is the inability to categorize family class non-refugee immigrants according to the permanent residency status of the sponsoring family member (i.e., economic or refugee). This may have caused some refugees to be misclassified as non-refugee immigrants and contributed to biasing estimates in Figures 1 and 2 towards the null. However, since refugees are less likely to have the financial means necessary for sponsorship, the number of family class members who may be refugees is not likely to substantially affect estimates. A third limitation may be that estimates in Figures 1 and 2 were over-adjusted given that the majority of non-refugee permanent residents are selected based on their education and official language ability. However, unadjusted estimates (see Supplementary Table S2) demonstrate that adjusting for these variables does not substantially affect our conclusions. A fourth limitation is that we lacked data on body mass index. Finally, our findings are not generalizable to *unsuccessful* refugee claimants (since our study was limited to permanent residents) who may be more representative of refugees and asylum seekers in other countries.

### *Implications*

To help understand modest differences in gestational diabetes and moderate PTB between refugee and non-refugee immigrant women, further research into stressors refugee mothers experience in their countries of origin, in transition countries and in countries of re-settlement may help support development of preconception and pregnancy stress prevention and management strategies.

Research has described that refugees and other immigrants in Canada experience barriers to accessing health care [48], had unaddressed health concerns after birth [49] and experienced culturally insensitive policies [48]. Indeed, such health care deficiencies may have contributed to the 1/3<sup>rd</sup> of outcomes where refugee and non-refugee immigrant mothers experienced greater odds when compared to Canadian-born mothers. By the same token, it is surprising that refugee mothers did not experience an excess of maternal and infant health risks compared to non-refugee immigrants since these health care deficiencies are likely experienced more acutely by refugee mothers.

There are a few important caveats to our findings. Firstly, and perhaps most importantly, the administrative definition of refugees is broad and is perhaps unable to sensitively identify refugees at highest health risk. Secondly, non-refugee immigrants from refugee-source countries may be just as likely to experience pre-departure health risks (related to persecution) as their refugee counterparts, reducing specificity and minimizing any differences between the groups. Thirdly, all permanent resident refugees to Canada receive financial and social supports (e.g., housing, resettlement), particularly in the first year after arrival as well as universal health care (as described in the methods section). Specialized primary health care centres catering to the unique health needs of refugees are available [50,51]. There are also national efforts to focus on equity in the quality of care received and migrant friendly maternity care [52]. These specialized health and social support efforts may be helping to minimize potential health inequities experienced by refugees. Lastly, despite official immigration policies, such as the Immigration & Refugee Protection Act (IRPA, 2002)[26,27] (see methods section for more detail), it is possible that unofficial processes select refugees based on factors such as skill level and language fluency (i.e., similar to non-refugee immigrants), effectively selecting for healthy refugees.

### *Future Research*

1  
2  
3  
4  
5  
6  
7  
8  
9  
10  
11  
12  
13  
14  
15  
16  
17  
18  
19  
20  
21  
22  
23  
24  
25  
26  
27  
28  
29  
30  
31  
32  
33  
34  
35  
36  
37  
38  
39  
40  
41  
42  
43  
44  
45  
46  
47  
48  
49  
50  
51  
52  
53  
54  
55  
56  
57  
58  
59  
60

Refugees should be compared to non-refugee immigrants, preferably from the same country of birth, as this more effectively addresses the question of whether refugees, among all migrants, are at increased risk for poor health. Further refining refugee status based on detailed migration experiences would also be beneficial. Finally, to help facilitate international comparisons, refugee health researchers may find it useful to state if and how immigration policies shape the health of refugees relative to other immigrants within their borders.

For peer review only

## References

- 1 Gagnon AJ, Merry L, Robinson C. A systematic review of refugee women's reproductive health. *Refuge* 2002.
- 2 Citizenship and Immigration Canada. Guide 6000 - Convention Refugees Abroad and Humanitarian-Protected Persons Abroad. 2017. <http://www.cic.gc.ca/English/information/applications/guides/E16000TOC.asp> (accessed 1 May 2017).
- 3 Immigration, Refugees & Citizenship Canada. Facts & Figures 2015: Immigration Overview - Permanent Residents – Annual IRCC Updates. Canada - Permanent residents by province or territory and category. 2015. [http://www.cic.gc.ca/opendata-donneesouvertes/data/IRCC\\_FFPR\\_17\\_F.xls](http://www.cic.gc.ca/opendata-donneesouvertes/data/IRCC_FFPR_17_F.xls) (accessed 11 May 2017).
- 4 Settlement.org. How does Canada's refugee system work? 2017. <http://settlement.org/ontario/immigration-citizenship/refugees/basic-information-for-refugees/how-does-canada-s-refugee-system-work/> (accessed 1 May 2017).
- 5 Wanigaratne S, Cole DC, Bassil K, *et al.* Contribution of HIV to Maternal Morbidity Among Refugee Women in Canada. *Am J Public Health* 2015;**105**:2449–56. doi:10.2105/AJPH.2015.302886
- 6 Wanigaratne S, Cole DC, Bassil K, *et al.* Severe Neonatal Morbidity Among Births to Refugee Women. *Matern Child Health J* 2016;**20**:2189–98. doi:10.1007/s10995-016-2047-4
- 7 Wanigaratne S, Cole DC, Bassil K, *et al.* The influence of refugee status and secondary migration on preterm birth. *J Epidemiol Community Health* 2016;**70**:622–8. doi:10.1136/jech-2015-206529
- 8 Vigod SN, Bagadia AJ, Hussain-Shamsy N, *et al.* Postpartum mental health of immigrant mothers by region of origin, time since immigration, and refugee status: a population-based study. *Arch Womens Ment Health*; **20**:439–47. doi:10.1007/s00737-017-0721-1
- 9 Van Hanegem N, Miltenburg AS, Zwart JJ, *et al.* Severe acute maternal morbidity in asylum seekers: a two-year nationwide cohort study in the Netherlands. *Acta Obstet Gynecol Scand* 2011;**90**:1010–6.
- 10 Gagnon AJ, Dougherty G, Wahoush O, *et al.* International migration to Canada: The post-birth health of mothers and infants by immigration class. *Soc Sci Med* 2012;**76**:197–207.
- 11 Vangen S, Stoltenberg C, Johansen REB, *et al.* Perinatal complications among ethnic Somalis in Norway. *Acta Obstet Gynecol Scand* 2002;**81**:317–22.
- 12 Essen B, Hanson BS, Ostergren PO, *et al.* Increased perinatal mortality among sub-Saharan immigrants in a city-population in Sweden. *Acta Obstet Gynecol Scand* 2000;**79**:737–43.
- 13 Belihu FB, Davey M-A, Small R. Perinatal health outcomes of East African immigrant populations in Victoria, Australia: a population based study. *BMC Pregnancy Childbirth* 2016;**16**. doi:10.1186/s12884-016-0886-z

- 1  
2  
3 14 Bakken KS, Skjeldal OH, Stray-Pedersen B. Immigrants from conflict-zone countries: an observational  
4 comparison study of obstetric outcomes in a low-risk maternity ward in Norway. *BMC Pregnancy*  
5 *Childbirth* 2015;**15**. doi:10.1186/s12884-015-0603-3  
6  
7 15 Miller LS, Robinson JA, Cibula DA. Healthy Immigrant Effect: Preterm Births Among Immigrants and  
8 Refugees in Syracuse, NY. *Matern Child Health J* 2016;**20**:484–93. doi:10.1007/s10995-015-1846-3  
9  
10 16 Gibson-Helm M, Teede H, Block A, *et al*. Maternal health and pregnancy outcomes among women  
11 of refugee background from African countries: a retrospective, observational study in Australia.  
12 *BMC Pregnancy Childbirth* 2014;**14**:392.  
13  
14 17 Gibson-Helm M, Boyle J, Cheng I-H, *et al*. Maternal health and pregnancy outcomes among women  
15 of refugee background from Asian countries. *Int J Gynecol Obstet* 2015;**129**:146–51.  
16 doi:10.1016/j.ijgo.2014.10.036  
17  
18 18 Gibson-Helm M, Teede H, Cheng I-H, *et al*. Maternal health and pregnancy outcomes comparing  
19 migrant women born in humanitarian and nonhumanitarian source countries: a retrospective,  
20 observational study. *Birth* 2015;**42**:116–24.  
21  
22 19 Urquia ML, Gagnon AJ. Glossary: migration and health. *J Epidemiol Community Health* 2011;**65**:467–  
23 472.  
24  
25 20 Public Health Agency of Canada. Perinatal Health Indicators for Canada - 2011. 2011.  
26 <http://www.phac-aspc.gc.ca/rhs-ssg/phi-isp-2011-eng.php> (accessed 15 Aug 2013).  
27  
28 21 Chiu M, Lebenbaum M, Lam K, *et al*. Describing the linkages of the immigration, refugees and  
29 citizenship Canada permanent resident data and vital statistics death registry to Ontario's  
30 administrative health database. *BMC Med Inform Decis Mak* 2016;**16**. doi:10.1186/s12911-016-  
31 0375-3  
32  
33 22 Joseph KS, Fahey J. Validation of perinatal data in the Discharge Abstract Database of the Canadian  
34 Institute for Health Information. *Chronic Dis Can* 2009;**29**:96–100.  
35  
36 23 Antoniou T, Zagorski B, Loutfy MR, *et al*. Validation of Case-Finding Algorithms Derived from  
37 Administrative Data for Identifying Adults Living with Human Immunodeficiency Virus Infection.  
38 *PLoS ONE* 2011;**6**:e21748. doi:10.1371/journal.pone.0021748  
39  
40 24 Keung N. The law says refugee claims must be heard in 60 days. So why are people waiting 16  
41 months? *Tor. Star*. 2017. [https://www.thestar.com/news/immigration/2017/09/20/the-law-says-](https://www.thestar.com/news/immigration/2017/09/20/the-law-says-refugee-claims-must-be-heard-in-60-days-so-why-are-asylum-seekers-waiting-16-months.html)  
42 [refugee-claims-must-be-heard-in-60-days-so-why-are-asylum-seekers-waiting-16-months.html](https://www.thestar.com/news/immigration/2017/09/20/the-law-says-refugee-claims-must-be-heard-in-60-days-so-why-are-asylum-seekers-waiting-16-months.html)  
43 (accessed 19 Nov 2017).  
44  
45 25 Keung N. Canada's refugee acceptance rate peaked in four years. *Tor. Star*.  
46 2017. [https://www.thestar.com/news/immigration/2017/03/07/canadas-refugee-acceptance-rate-](https://www.thestar.com/news/immigration/2017/03/07/canadas-refugee-acceptance-rate-peaked-in-four-years.html)  
47 [peaked-in-four-years.html](https://www.thestar.com/news/immigration/2017/03/07/canadas-refugee-acceptance-rate-peaked-in-four-years.html) (accessed 19 Nov 2017).  
48  
49 26 Immigration, Refugees & Citizenship Canada. Excessive demand on health and social services.  
50 2016. <http://www.cic.gc.ca/english/resources/tools/medic/admiss/excessive.asp> (accessed 1 May  
51 2017).  
52  
53  
54  
55  
56  
57  
58  
59  
60

- 1  
2  
3 27 Minister of Justice, Canada. Immigration and Refugee Protection Act S.C. 2001, c.27. 2016.  
4 <http://laws.justice.gc.ca/PDF/I-2.5.pdf> (accessed 19 Dec 2016).  
5  
6 28 Joseph KS, Liu S, Rouleau J, *et al.* Severe maternal morbidity in Canada, 2003 to 2007: surveillance  
7 using routine hospitalization data and ICD-10CA codes. *J Obstet Gynaecol Can* 2010;**32**:837–846.  
8  
9 29 Liu S, Joseph KS, Bartholomew S, *et al.* Temporal trends and regional variations in severe maternal  
10 morbidity in Canada, 2003 to 2007. *J Obstet Gynaecol Can* 2010;**32**:847–855.  
11  
12 30 United Nations Statistics Division. Composition of macro geographical (continental) regions,  
13 geographical sub-regions, and selected economic and other groups.  
14 2013.<http://unstats.un.org/unsd/methods/m49/m49regin.htm> (accessed 13 Oct 2016).  
15  
16 31 Gagnon AJ, Van Hulst A, Merry L, *et al.* Cesarean section rate differences by migration indicators.  
17 *Arch Gynecol Obstet* 2013;**287**:633–9. doi:10.1007/s00404-012-2609-7  
18  
19 32 Hosler AS, Nayak SG, Radigan AM. Stressful events, smoking exposure and other maternal risk  
20 factors associated with gestational diabetes mellitus. *Paediatr Perinat Epidemiol* 2011;**25**:566–574.  
21  
22 33 Latendresse G. The interaction between chronic stress and pregnancy: preterm birth from a  
23 biobehavioral perspective. *J Midwifery Women's Health* 2009;**54**:8–17.  
24  
25 34 Wadhwa PD, Entringer S, Buss C, *et al.* The contribution of maternal stress to preterm birth: issues  
26 and considerations. *Clin Perinatol* 2011;**38**:351–84. doi:10.1016/j.clp.2011.06.007  
27  
28 35 Vang ZM, Sigouin J, Flenon A, *et al.* Are immigrants healthier than native-born Canadians? A  
29 systematic review of the healthy immigrant effect in Canada. *Ethn Health* 2017;**22**:209–41.  
30 doi:10.1080/13557858.2016.1246518  
31  
32 36 Goosen S, Hoebe CJ, Waldhober Q, *et al.* High HIV prevalence among asylum seekers who gave birth  
33 in the Netherlands: a nationwide study based on antenatal HIV tests. *PLoS One* 2015;**10**:e0134724.  
34  
35 37 Dennis C-L, Merry L, Stewart D, *et al.* Prevalence, continuation, and identification of postpartum  
36 depressive symptomatology among refugee, asylum-seeking, non-refugee immigrant, and  
37 Canadian-born women: results from a prospective cohort study. *Arch Womens Ment Health*  
38 2016;**19**:959–67. doi:10.1007/s00737-016-0633-5  
39  
40 38 Dennis C-L, Merry L, Gagnon AJ. Postpartum depression risk factors among recent refugee, asylum-  
41 seeking, non-refugee immigrant, and Canadian-born women: results from a prospective cohort  
42 study. *Soc Psychiatry Psychiatr Epidemiol* 2017;**52**:411–22. doi:10.1007/s00127-017-1353-5  
43  
44 39 Gann P, Nghiem L, Warner S. Pregnancy characteristics and outcomes of Cambodian refugees. *Am J*  
45 *Public Health* 1989;**79**:1251–7.  
46  
47 40 Flynn PM, Foster EM, Brost BC. Indicators of acculturation related to Somali refugee women's birth  
48 outcomes in Minnesota. *J Immigr Minor Health* 2011;**13**:224–231.  
49  
50 41 Kandasamy T, Berniak R, Shah R, *et al.* Obstetric Risks and Outcomes of Refugee Women at a Single  
51 Centre in Toronto. *J Obstet Gynaecol Can* 2014;**36**:296–302.  
52  
53  
54  
55  
56  
57  
58  
59  
60

- 1  
2  
3 42 Davis JM, Goldenring J, McChesney M, *et al.* Pregnancy outcomes of Indochinese refugees, Santa  
4 Clara County, California. *Am J Public Health* 1982;**72**:742–4.  
5  
6 43 Lalchandani S, MacQuillan K, Sheil O. Obstetric profiles and pregnancy outcomes of immigrant  
7 women with refugee status. *Ir Med J* 2001;**94**:79–80.  
8  
9 44 King PA, Duthie SJ, Li DFH, *et al.* Obstetric outcome among Vietnamese refugees in Hong Kong: an  
10 age-matched case-controlled study. *Int J Gynaecol Obstet Off Organ Int Fed Gynaecol Obstet*  
11 1990;**33**:203–10.  
12  
13 45 Malamitsi-Puchner A, Tzala L, Minaretzis D, *et al.* Preterm delivery and low birthweight among  
14 refugees in Greece. *Paediatr Perinat Epidemiol* 1994;**8**:384–390.  
15  
16 46 Kuvacic I, Skrabin S, Hodzic D, *et al.* Possible influence of expatriation on perinatal outcome. *Acta*  
17 *Obstet Gynecol Scand* 1996;**75**:367–71.  
18  
19 47 Liu C, Urquia M, Cnattingius S, *et al.* Migration and preterm birth in war refugees: a Swedish cohort  
20 study. *Eur J Epidemiol* 2014;**29**:141–3. doi:10.1007/s10654-013-9877-9  
21  
22 48 Stewart M, Dennis CL, Kariwo M, *et al.* Challenges Faced by Refugee New Parents from Africa in  
23 Canada. *J Immigr Minor Health* 2015;**17**:1146–56. doi:10.1007/s10903-014-0062-3  
24  
25 49 Gagnon AJ, Dougherty G, Platt RW, *et al.* Refugee and refugee-claimant women and infants post-  
26 birth: migration histories as a predictor of Canadian health system response to needs. *Can J Public*  
27 *Health Rev Can Sante Publique* 2007;**98**:287–91.  
28  
29 50 Women’s College Hospital. Crossroads Clinic. [http://www.womenscollegehospital.ca/programs-and-](http://www.womenscollegehospital.ca/programs-and-services/crossroads-clinic/)  
30 [services/crossroads-clinic/](http://www.womenscollegehospital.ca/programs-and-services/crossroads-clinic/) (accessed 21 Jul 2017).  
31  
32 51 Access Alliance Multicultural Health and Community Services. <http://accessalliance.ca/> (accessed 21  
33 Jul 2017).  
34  
35 52 Gagnon AJ, DeBruyn R, Essén B, *et al.* Development of the Migrant Friendly Maternity Care  
36 Questionnaire (MFMCQ) for migrants to Western societies: an international Delphi consensus  
37 process. *BMC Pregnancy Childbirth* 2014;**14**:200.  
38  
39  
40  
41  
42  
43  
44  
45  
46  
47  
48  
49  
50  
51  
52  
53  
54  
55  
56  
57  
58  
59  
60

1  
2  
3 **Contributors:** SW (1),YS (2), AG (3), DCC (4), MR (5), JB (6), PD (7), RM (8), JGR (9), MLU (10).

4 SW (1) conceived the research questions, designed the study, conducted statistical analysis, interpreted  
5 the results and wrote the first and subsequent drafts of the manuscript. RM (8), JGR (9) and MLU (10)  
6 contributed to the research design and data analysis. YS (2), AG (3), DCC (4), MR (5), JB (6), PD (7), RM  
7 (8), JGR (9) and MLU (10) contributed to data interpretation and revisions of the manuscript. MLU (10)  
8 and JGR (9) obtained funding. All authors approved the final version of the submitted manuscript.  
9

10  
11 **Funding:** This study was funded by a grant from the Canadian Institutes of Health Research (CIHR) (MOP  
12 137110). SW is supported by a post-doctoral fellowship funded from this grant. MLU holds a Canada  
13 Research Chair in Applied Population Health. JGR holds a CIHR Chair in Reproductive, Child and Youth  
14 Health Services and Policy Research.  
15

16  
17 **Competing Interests:** All authors have completed the ICMJE uniform disclosure form at  
18 [www.icmje.org/coi\\_disclosure.pdf](http://www.icmje.org/coi_disclosure.pdf) and declare: no support from any organisation for the submitted  
19 work; no financial relationships with any organisations that might have an interest in the submitted  
20 work in the previous three years; no other relationships or activities that could appear to have  
21 influenced the submitted work.  
22

23  
24 **Acknowledgements/Disclaimer:** This study was supported by the Institute for Clinical Evaluative  
25 Sciences (ICES), which is funded by an annual grant from the Ontario Ministry of Health and Long-Term  
26 Care (MOHLTC). The opinions, results and conclusions reported in this paper are those of the authors  
27 and are independent from the funding sources. No endorsement by ICES or the Ontario MOHLTC is  
28 intended or should be inferred. Parts of this material are based on data and information compiled and  
29 provided by CIHI. However, the analyses, conclusions, opinions and statements expressed herein are  
30 those of the author, and not necessarily those of CIHI.  
31

32 **Data Sharing Statement:** There are no additional unpublished data available from this study.  
33  
34  
35  
36  
37  
38  
39  
40  
41  
42  
43  
44  
45  
46  
47  
48  
49  
50  
51  
52  
53  
54  
55  
56  
57  
58  
59  
60

**Table 1: Characteristics of refugee immigrant, non-refugee immigrant and Canadian-born mothers in Ontario, Canada 2002-2014.**

|                                                 | <b>Refugee immigrant<br/>(N = 34,233)</b> | <b>Non-refugee immigrant<br/>(N = 243,439)</b> | <b>Canadian-born<br/>(N = 615,394)</b> |
|-------------------------------------------------|-------------------------------------------|------------------------------------------------|----------------------------------------|
| <b>Maternal age at first birth, years</b>       |                                           |                                                |                                        |
| 15-19                                           | 989 (2.9)                                 | 3,469 (1.4)                                    | 40,905 (6.6)                           |
| 20-24                                           | 5,271 (15.4)                              | 30,330 (12.5)                                  | 98,808 (16.1)                          |
| 25-29                                           | 10,231 (29.9)                             | 75,982 (31.2)                                  | 180,850 (29.4)                         |
| 30-34                                           | 10,032 (29.3)                             | 79,885 (32.8)                                  | 191,433 (31.1)                         |
| 35-39                                           | 5,958 (17.4)                              | 42,893 (17.6)                                  | 84,383 (13.7)                          |
| ≥ 40                                            | 1,742 (5.1)                               | 10,843 (4.5)                                   | 18,624 (3.0)                           |
| Missing                                         | 10 (0.0)                                  | 37 (0.0)                                       | 391 (0.1)                              |
| <b>Parity at first birth in Ontario</b>         |                                           |                                                |                                        |
| 0                                               | 18,826 (55.0)                             | 152,530 (62.7)                                 | 445,715 (72.4)                         |
| 1                                               | 7,631 (22.3)                              | 62,708 (25.8)                                  | 109,462 (17.8)                         |
| 2                                               | 4,317 (12.6)                              | 20,091 (8.3)                                   | 42,656 (6.9)                           |
| ≥3                                              | 3,421 (10.0)                              | 7,892 (3.2)                                    | 16,635 (2.7)                           |
| Missing                                         | 38 (0.1)                                  | 218 (0.1)                                      | 926 (0.2)                              |
| <b>Number of births in Ontario</b>              |                                           |                                                |                                        |
| 1                                               | 20,406 (59.6)                             | 148,694 (61.1)                                 | 328,458 (53.4)                         |
| 2                                               | 10,356 (30.3)                             | 76,411 (31.4)                                  | 225,838 (36.7)                         |
| 3                                               | 2,800 (8.2)                               | 15,473 (6.4)                                   | 50,262 (8.2)                           |
| ≥ 4                                             | 671 (2.0)                                 | 2,861 (1.2)                                    | 10,836 (1.8)                           |
| <b>Neighbourhood income quintile</b>            |                                           |                                                |                                        |
| 1 (lowest)                                      | 15,332 (44.8)                             | 78,309 (32.2)                                  | 111,281 (18.1)                         |
| 2,3,4 (middle)                                  | 16,804 (49.1)                             | 141,357 (58.1)                                 | 386,578 (62.8)                         |
| 5 (highest)                                     | 2001 (5.8)                                | 22,926 (9.4)                                   | 113,769 (18.5)                         |
| Missing                                         | 96 (0.3)                                  | 847 (0.3)                                      | 3,766 (0.6)                            |
| <b>Official language ability at immigration</b> |                                           |                                                |                                        |
| English and/or French                           | 19,633 (57.4)                             | 157,788 (64.8)                                 | --                                     |
| Neither English or French                       | 14,600 (42.6)                             | 85,645 (35.2)                                  | --                                     |
| Missing                                         | 0 (0.0)                                   | 6 (0.0)                                        | --                                     |
| <b>Level of education at immigration</b>        |                                           |                                                |                                        |
| 0-9 years                                       | 14,923 (43.6)                             | 56,485 (23.2)                                  | --                                     |
| 10-12 years                                     | 9,931 (29.0)                              | 48,137 (19.8)                                  | --                                     |
| ≥ 13 years                                      | 3,010 (8.8)                               | 22,380 (9.2)                                   | --                                     |
| Trade, Diplomas                                 | 3,720 (10.9)                              | 30,852 (12.7)                                  | --                                     |
| Bachelors, Masters, Doctorate                   | 2,649 (7.7)                               | 85,585 (35.2)                                  | --                                     |
| <b>Duration of residence, years</b>             |                                           |                                                |                                        |
| < 10                                            | 21,569 (63.0)                             | 184,508 (75.8)                                 | --                                     |
| ≥ 10                                            | 12,664 (37.0)                             | 58,931 (24.2)                                  | --                                     |
| <b>World region of birth</b>                    |                                           |                                                |                                        |
| South Asia                                      | 9,233 (27.0)                              | 78,184 (32.1)                                  | --                                     |
| Sub Saharan Africa                              | 7,810 (22.8)                              | 11,733 (4.8)                                   | --                                     |
| Latin America & Caribbean                       | 4,928 (14.4)                              | 33,075 (13.6)                                  | --                                     |
| Western & Central Asia, North Africa            | 3,458 (10.1)                              | 17,502 (7.2)                                   | --                                     |
| Eastern Europe                                  | 3,189 (9.3)                               | 18,542 (7.6)                                   | --                                     |
| Southeast Asia, Oceania Islands                 | 1,514 (4.4)                               | 28,514 (11.7)                                  | --                                     |



1  
2  
3  
4  
5  
6  
7  
8  
9  
10  
11  
12  
13  
14  
15  
16  
17  
18  
19  
20  
21  
22  
23  
24  
25  
26  
27  
28  
29  
30  
31  
32  
33  
34  
35  
36  
37  
38  
39  
40  
41  
42  
43  
44  
45  
46  
47  
48  
49  
50  
51  
52  
53  
54  
55  
56  
57  
58  
59  
60

|                                    |              |               |    |
|------------------------------------|--------------|---------------|----|
| <i>East Asia (excluding Japan)</i> | 1,878 (5.5)  | 35,669 (14.7) | -- |
| <i>Southern Europe</i>             | 1,966 (25.1) | 8,003 (30.8)  | -- |
| <i>Developed Countries</i>         | 250 (22.4)   | 12,152 (25.5) | -- |
| <i>Missing</i>                     | 7 (0.0)      | 65 (0.0)      | -- |

For peer review only

## FIGURE LEGEND

**Figure 1: Adverse maternal outcomes comparing 29,023 first births in Ontario to refugee immigrants (● circles) vs. 29,023 first births in Ontario births to non-refugee immigrants (○ circles), 1:1 matched on country of birth, year and age at arrival (+/- 5 years). Odds ratios adjusted for maternal age, parity, income quintile, official language ability, education and duration of residence.**

Figure 1 footnote: AOR – adjusted odds ratio; CI – confidence interval; ICU – intensive care unit; HIV – human immunodeficiency virus

**Figure 2: Adverse perinatal outcomes comparing first births in Ontario to refugee immigrants (● circles) vs. first births in Ontario to non-refugee immigrants (○ circles), 1:1 matched on country of birth, year and age at arrival (+/- 5 years). Denominators vary with the outcome examined. Odds ratios adjusted for maternal age, parity, income quintile, official language ability, education and duration of residence.**

Figure 2 footnote: AOR – adjusted odds ratio; CI – confidence interval; NICU – neonatal intensive care unit

**Figure 3: Adverse maternal outcomes comparing 52,360 births to refugee immigrants (● circles) and 360,007 births to non-refugee immigrants (● circles) vs. 977,045 births to Canadian-born (○ circles) mothers. Odds ratios adjusted for maternal age, parity and income quintile.**

Figure 3 footnote: AOR – adjusted odds ratio; CI – confidence interval; ICU – intensive care unit; HIV – human immunodeficiency virus

**Figure 4: Adverse perinatal outcomes comparing births to refugee immigrants (● circles) and births to non-refugee immigrants (● circles) vs. births to Canadian-born mothers (○ circles). Denominators vary with the outcome examined. Odds ratios adjusted for maternal age, parity, and income quintile.**

Figure 4 footnote: AOR – adjusted odds ratio; CI – confidence interval; NICU – neonatal intensive care unit

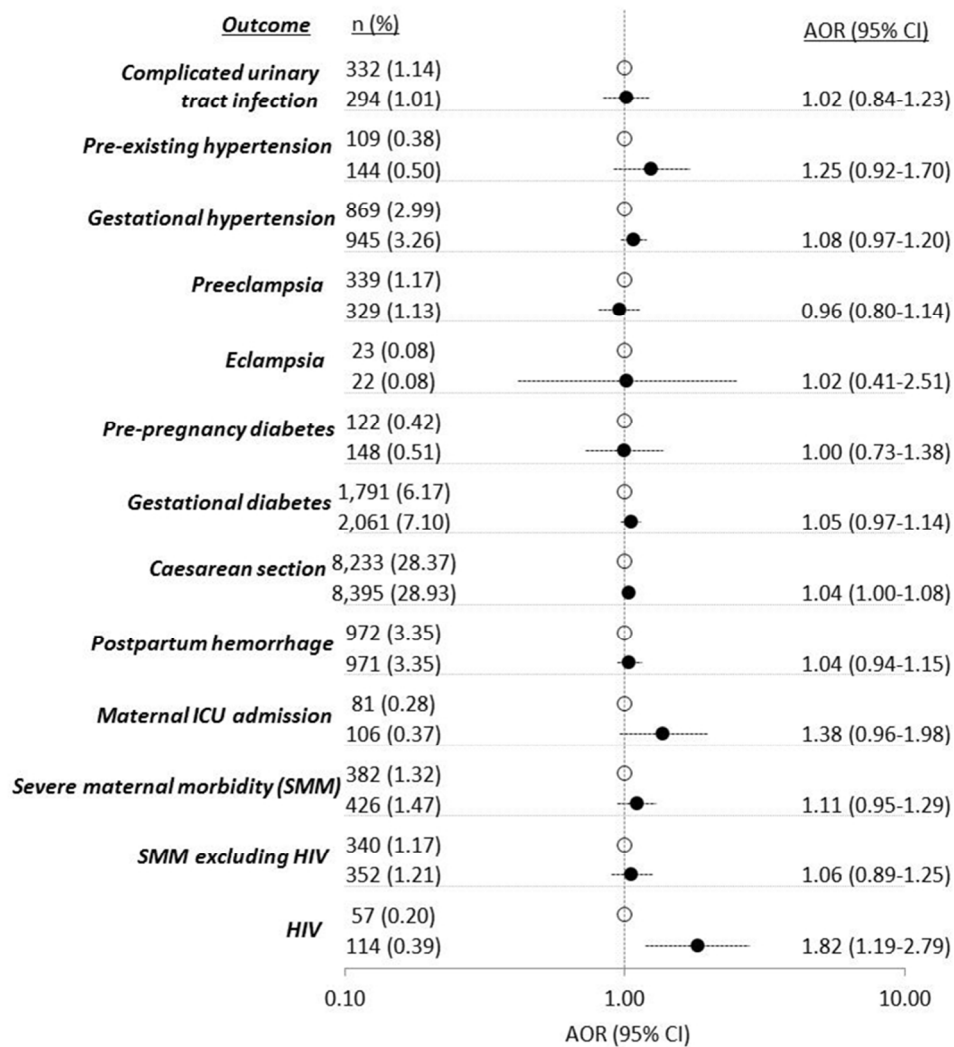

Figure 1: Adverse maternal outcomes comparing 29,023 first births in Ontario to refugee immigrants (black circles) vs. 29,023 first births in Ontario to non-refugee immigrants (open circles), 1:1 matched on country of birth, year and age at arrival (+/- 5 years). Odds ratios adjusted for maternal age, parity, income quintile, official language ability, education and duration of residence.

Figure 1 footnote: AOR – adjusted odds ratio; CI – confidence interval; ICU – intensive care unit; HIV – human immunodeficiency virus

72x85mm (300 x 300 DPI)

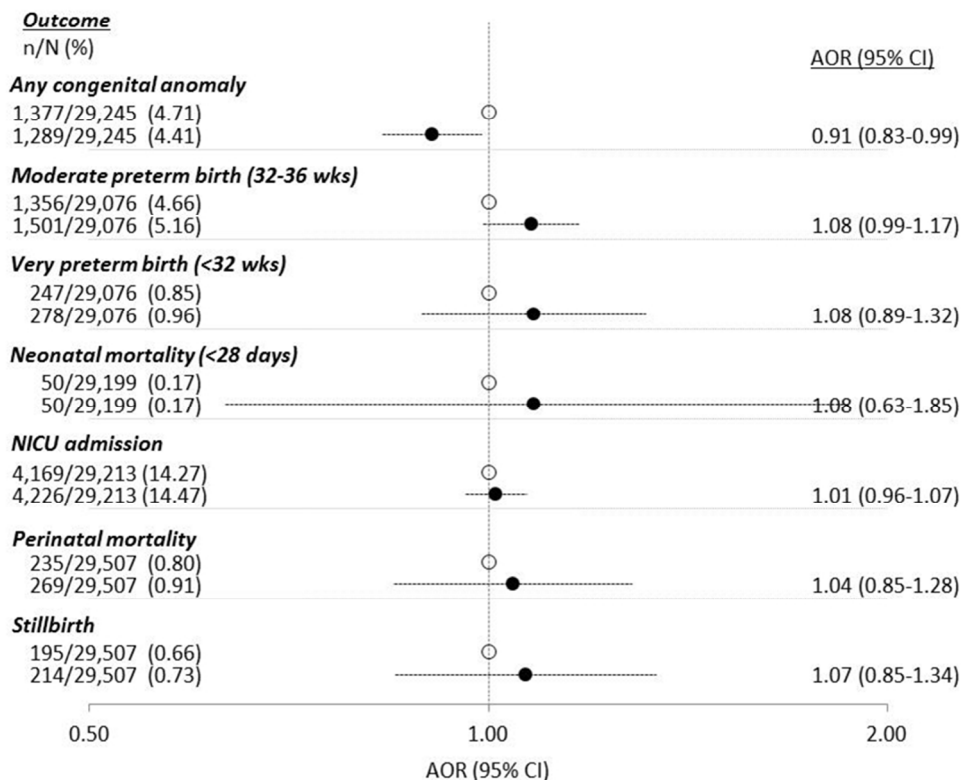

Figure 2: Adverse perinatal outcomes comparing first births in Ontario to refugee immigrants (black circles) vs. first births in Ontario to non-refugee immigrants (open circles), 1:1 matched on country of birth, year and age at arrival (+/- 5 years). Denominators vary with the outcome examined. Odds ratios adjusted for maternal age, parity, income quintile, official language ability, education and duration of residence.

Figure 2 footnote: AOR – adjusted odds ratio; CI – confidence interval; NICU – neonatal intensive care unit

73x63mm (300 x 300 DPI)

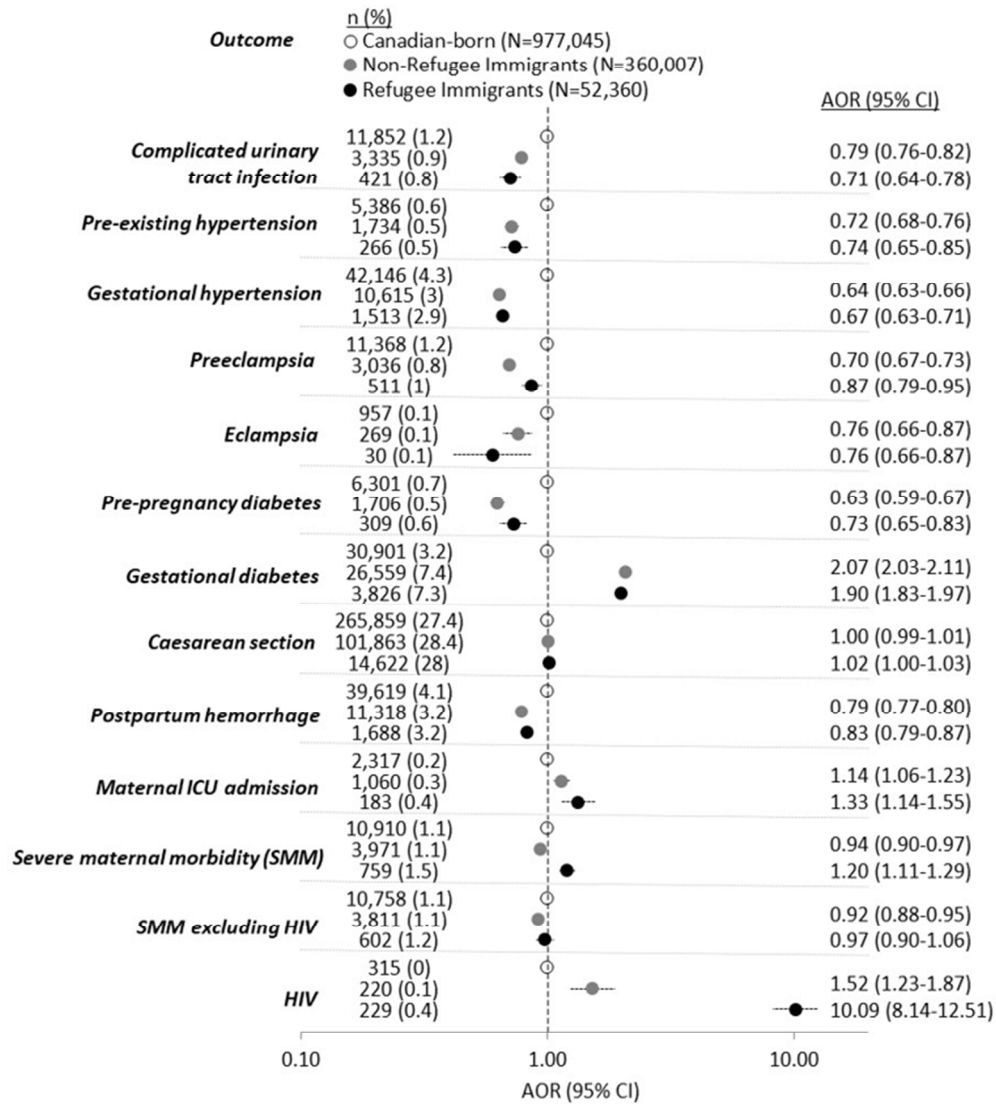

Figure 3: Adverse maternal outcomes comparing 52,360 births to refugee immigrants (black circles) and 360,007 births to non-refugee immigrants (grey circles) vs. 977,045 births to Canadian-born (open circles) mothers. Odds ratios adjusted for maternal age, parity and income quintile.

Figure 3 footnote: AOR – adjusted odds ratio; CI – confidence interval; ICU – intensive care unit; HIV – human immunodeficiency virus

64x76mm (300 x 300 DPI)

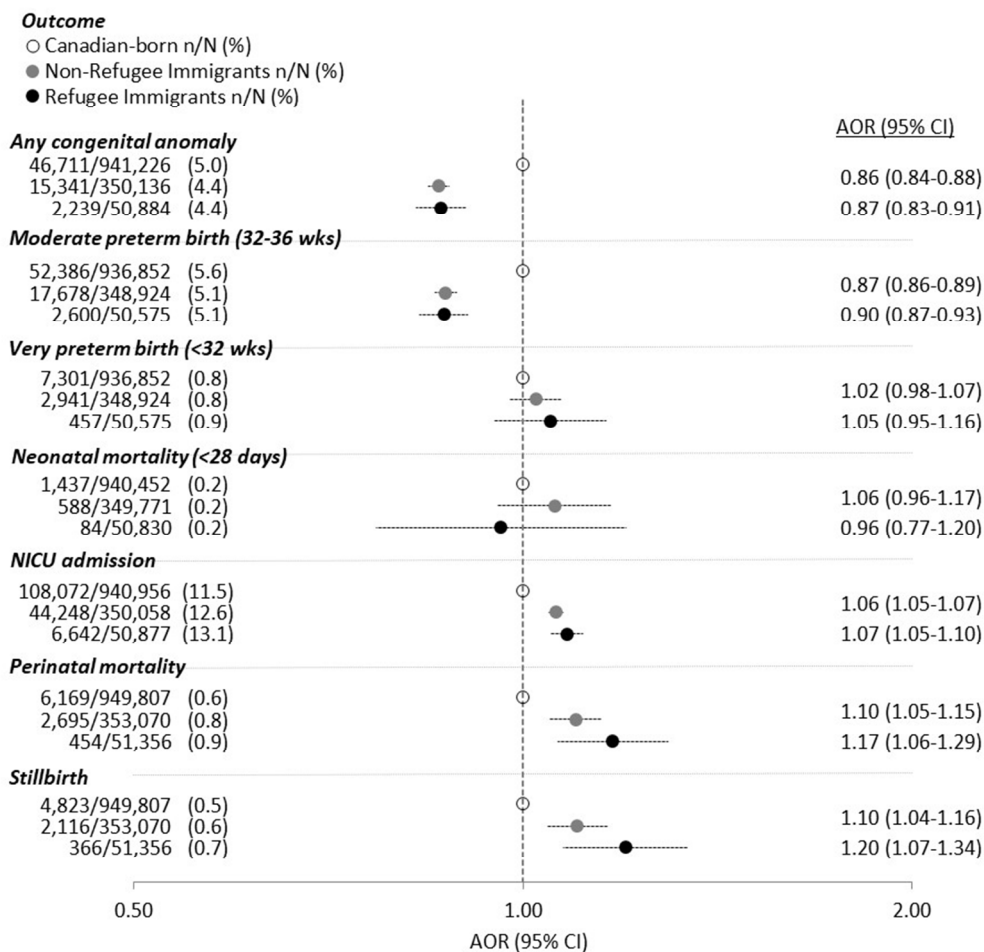

Figure 4: Adverse perinatal outcomes comparing births to refugee immigrants (black circles) and births to non-refugee immigrants (grey circles) vs. births to Canadian-born mothers (open circles). Denominators vary with the outcome examined. Odds ratios adjusted for maternal age, parity, and income quintile.

Figure 4 footnote: AOR – adjusted odds ratio; CI – confidence interval; NICU – neonatal intensive care unit

76x73mm (300 x 300 DPI)

Wanigaratne *et al* - Supplementary Material

## Refugee maternal and perinatal health in Ontario, Canada: a retrospective population-based study

## SUPPLEMENTARY TABLES

Table S1: List of 10th revision of the *International Statistical Classification of Diseases and Related Health Problems*, Canadian enhancement, and *Canadian Classification of Health Interventions* (ICD-10-CA/CCI) codes for maternal and perinatal outcomes

| Maternal or Perinatal Outcome                 | Definition                                                                 | Source Database | ICD-10-CA/CCI                                              |
|-----------------------------------------------|----------------------------------------------------------------------------|-----------------|------------------------------------------------------------|
| Complicated urinary tract infection           |                                                                            | CIHI-DAD        | O23, O86, N39                                              |
| Pre-existing hypertension                     |                                                                            | CIHI-DAD        | O10, O11                                                   |
| Gestational hypertension                      |                                                                            | CIHI-DAD        | O13                                                        |
| Preeclampsia                                  |                                                                            |                 | O14                                                        |
| Eclampsia                                     |                                                                            | CIHI-DAD        | O15                                                        |
| Pre-pregnancy diabetes mellitus               |                                                                            | CIHI-DAD        | O24.0-O24.3                                                |
| Gestational diabetes mellitus (GDM)           |                                                                            | CIHI-DAD        | O24.4                                                      |
| Caesarean delivery                            |                                                                            | CIHI-DAD        | 5.MD.60.^                                                  |
| Post-partum hemorrhage                        |                                                                            | CIHI-DAD        | O72                                                        |
| Maternal intensive care unit (ICU) admission  |                                                                            | CIHI-DAD        | Special Care Unit 1-6                                      |
| Severe maternal morbidity                     |                                                                            | CIHI-DAD        | See Joseph <i>et al</i> , 2010*                            |
| HIV                                           | Three physician diagnoses within three years.                              | Ontario HIV DB  |                                                            |
| Congenital anomaly                            | An abnormality of structure or function present at birth                   | CIHI-DAD        | ICD-10: Q00-Q99                                            |
| Moderate preterm birth (PTB)                  | Live birth with gestational age 32-36 weeks                                | CIHI-DAD        | 32-36 weeks gestation recorded on CIHI-DAD birth record    |
| Very preterm birth (VPTB)                     | Live birth with gestational age <32 weeks                                  | CIHI-DAD        | < 32 weeks gestation recorded on CIHI-DAD birth record     |
| Neonatal mortality                            | Death <28 days of life                                                     | RPDB, ORG-VSD   |                                                            |
| Neonatal intensive care unit (NICU) admission |                                                                            | CIHI-DAD        | Special care unit admission, any level                     |
| Perinatal mortality                           | Stillbirth or death of live born infant < 7 days of life                   | RPDB, ORG-VSD   |                                                            |
| Stillbirth                                    | Intrauterine fetal death $\geq$ 20 weeks gestation and > 500 g birthweight | CIHI-DAD        | Maternal record: Z371, Z373-7, O364.<br>Infant record: P95 |

## Abbreviations

ICD-10-CA/CCI - 10th revision of the *International Statistical Classification of Diseases and Related Health Problems*, Canadian enhancement, and *Canadian Classification of Health Interventions* (ICD-10-CA/CCI)

CIHI-DAD – Canadian Institute for Health Information – Discharge Abstract Database

RPDB – Registered Persons Database (referred to as “Ontario Health Care Registry” in paper)

ORGD-VSD – Office of the Registrar General’s Vital Statistics-Death Registry

\* Joseph KS, Liu S, Rouleau J, Kirby RS, Kramer MS, Sauve R, *et al*. Severe maternal morbidity in Canada, 2003 to 2007: surveillance using routine hospitalization data and ICD-10CA codes. *J Obstet Gynaecol Can*. 2010;32(9):837

Wanigaratne *et al* - Supplementary Material

Refugee maternal and perinatal health in Ontario, Canada: a retrospective population-based study

Table S2: Unadjusted Odds Ratios (OR) (95% CI) for Figures 1 and 2

| <b>FIGURE 1</b>                        |                               |
|----------------------------------------|-------------------------------|
| <b>OUTCOME</b>                         | <b>UNADJUSTED OR (95% CI)</b> |
| Complicated urinary tract infection    | 0.88 (0.75-1.04)              |
| Pre-existing hypertension              | 1.32 (1.03-1.69)              |
| Gestational hypertension               | 1.09 (0.99-1.20)              |
| Preeclampsia                           | 0.97 (0.83-1.13)              |
| Eclampsia                              | 0.96 (0.53-1.72)              |
| Pre-pregnancy diabetes mellitus        | 1.22 (0.96-1.55)              |
| Gestational diabetes mellitus (GDM)    | 1.17 (1.09-1.25)              |
| Caesarean delivery                     | 1.03 (0.99-1.07)              |
| Post-partum hemorrhage                 | 1.00 (0.91-1.09)              |
| Maternal intensive care unit admission | 1.31 (0.98-1.75)              |
| Severe maternal morbidity (SMM)        | 1.12 (0.97-1.28)              |
| SMM excluding HIV                      | 1.04 (0.89-1.20)              |
| HIV                                    | 2.06 (1.48-2.85)              |
| <b>FIGURE 2</b>                        |                               |
| <b>OUTCOME</b>                         | <b>UNADJUSTED OR (95% CI)</b> |
| Congenital anomaly                     | 0.93 (0.86-1.01)              |
| Moderate preterm birth (MPTB)          | 1.11 (1.03-1.20)              |
| Very preterm birth (VPTB)              | 1.13 (0.95-1.34)              |
| Neonatal mortality                     | 1.00 (0.68-1.48)              |
| Neonatal intensive care unit admission | 1.02 (0.97-1.07)              |
| Perinatal mortality                    | 1.15 (0.96-1.37)              |
| Stillbirth                             | 1.10 (0.91-1.34)              |



Wanigaratne *et al* - Supplementary Material

## Refugee maternal and perinatal health in Ontario, Canada: a retrospective population-based study

Table S3: Unadjusted Odds Ratios (OR) (95% CI) for Figures 3 and 4

| FIGURE 3<br>OUTCOME                           | UNADJUSTED OR (95% CI) |                      |
|-----------------------------------------------|------------------------|----------------------|
|                                               | REFUGEES VS. CDN       | NON-REFUGEES VS. CDN |
| Complicated urinary tract infection           | 0.66 (0.60-0.73)       | 0.76 (0.73-0.79)     |
| Pre-existing hypertension                     | 0.92 (0.81-1.05)       | 0.86 (0.81-0.91)     |
| Gestational hypertension                      | 0.65 (0.62-0.69)       | 0.67 (0.65-0.68)     |
| Preeclampsia                                  | 0.83 (0.76-0.91)       | 0.72 (0.69-0.75)     |
| Eclampsia                                     | 0.58 (0.40-0.84)       | 0.76 (0.66-0.87)     |
| Pre-pregnancy diabetes mellitus               | 0.90 (0.79-1.02)       | 0.72 (0.67-0.76)     |
| Gestational diabetes mellitus (GDM)           | 2.38 (2.29-2.47)       | 2.40 (2.36-2.45)     |
| Caesarean delivery                            | 1.05 (1.02-1.07)       | 1.07 (1.06-1.09)     |
| Post-partum hemorrhage (PPH)                  | 0.79 (0.75-0.84)       | 0.78 (0.76-0.79)     |
| Maternal intensive care unit admission        | 1.47 (1.26-1.71)       | 1.24 (1.15-1.33)     |
| Severe maternal morbidity (SMM)               | 1.30 (1.20-1.41)       | 0.98 (0.95-1.02)     |
| SMM without HIV                               | 1.04 (0.96-1.13)       | 0.96 (0.92-0.99)     |
| HIV                                           | 13.91 (11.37-17.01)    | 1.85 (1.51-2.26)     |
| FIGURE 4<br>OUTCOME                           |                        |                      |
| Congenital anomaly                            | 0.88 (0.84-0.92)       | 0.88 (0.86-0.89)     |
| Moderate preterm birth (MPTB)                 | 0.92 (0.88-0.96)       | 0.90 (0.88-0.92)     |
| Very preterm birth (VPTB)                     | 1.16 (1.06-1.28)       | 1.08 (1.03-1.13)     |
| Neonatal mortality                            | 1.08 (0.87-1.35)       | 1.10 (1.00-1.21)     |
| Neonatal intensive care unit (NICU) admission | 1.15 (1.12-1.19)       | 1.11 (1.10-1.13)     |
| Perinatal mortality                           | 1.37 (1.24-1.51)       | 1.17 (1.12-1.23)     |
| Stillbirth                                    | 1.41 (1.26-1.57)       | 1.18 (1.12-1.24)     |

Wanigaratne *et al* - Supplementary Material

Refugee maternal and perinatal health in Ontario, Canada: a retrospective population-based study

SUPPLEMENTARY FIGURES

Figure S1a: Adverse maternal outcomes comparing 5,724 births to Sri Lankan refugee immigrants (▲ triangles) vs. 17,373 births to Sri Lankan non-refugee immigrants (△ triangles). Odds ratios adjusted for maternal age, parity, income quintile, official language ability, education and duration of residence.

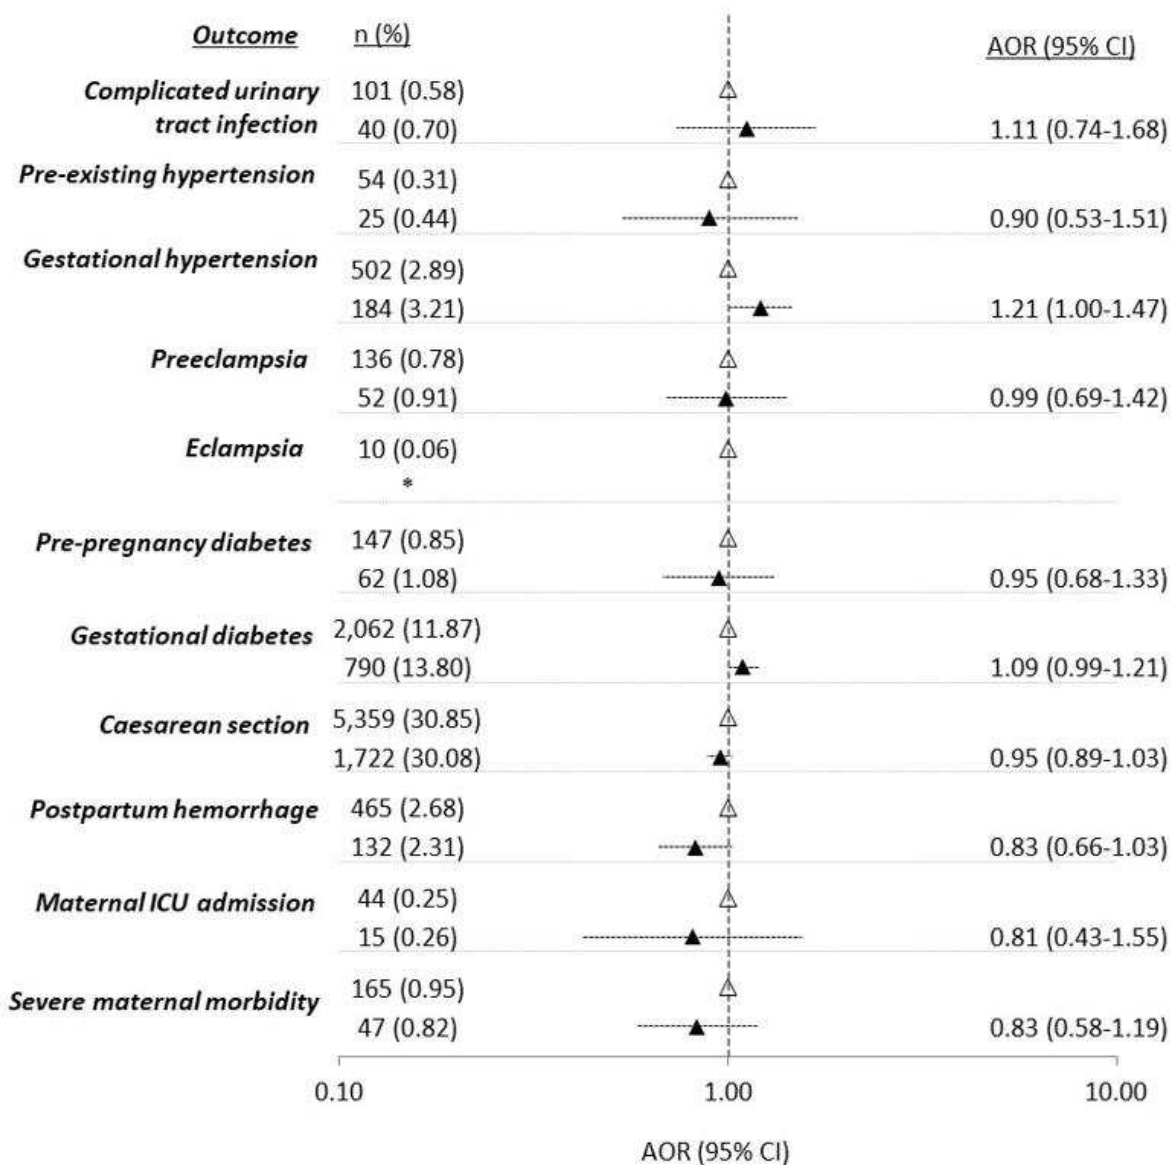

AOR – adjusted odds ratio; CI – confidence interval; ICU – intensive care unit; HIV – human immunodeficiency virus

Wanigaratne *et al* - Supplementary Material

Refugee maternal and perinatal health in Ontario, Canada: a retrospective population-based study

**Figure S1b: Adverse perinatal outcomes comparing births to Sri Lankan refugee immigrants (▲ triangles) vs. births to Sri Lankan non-refugee immigrants (△ triangles). Odds ratios adjusted for maternal age, parity, income quintile, official language ability, education and duration of residence.**

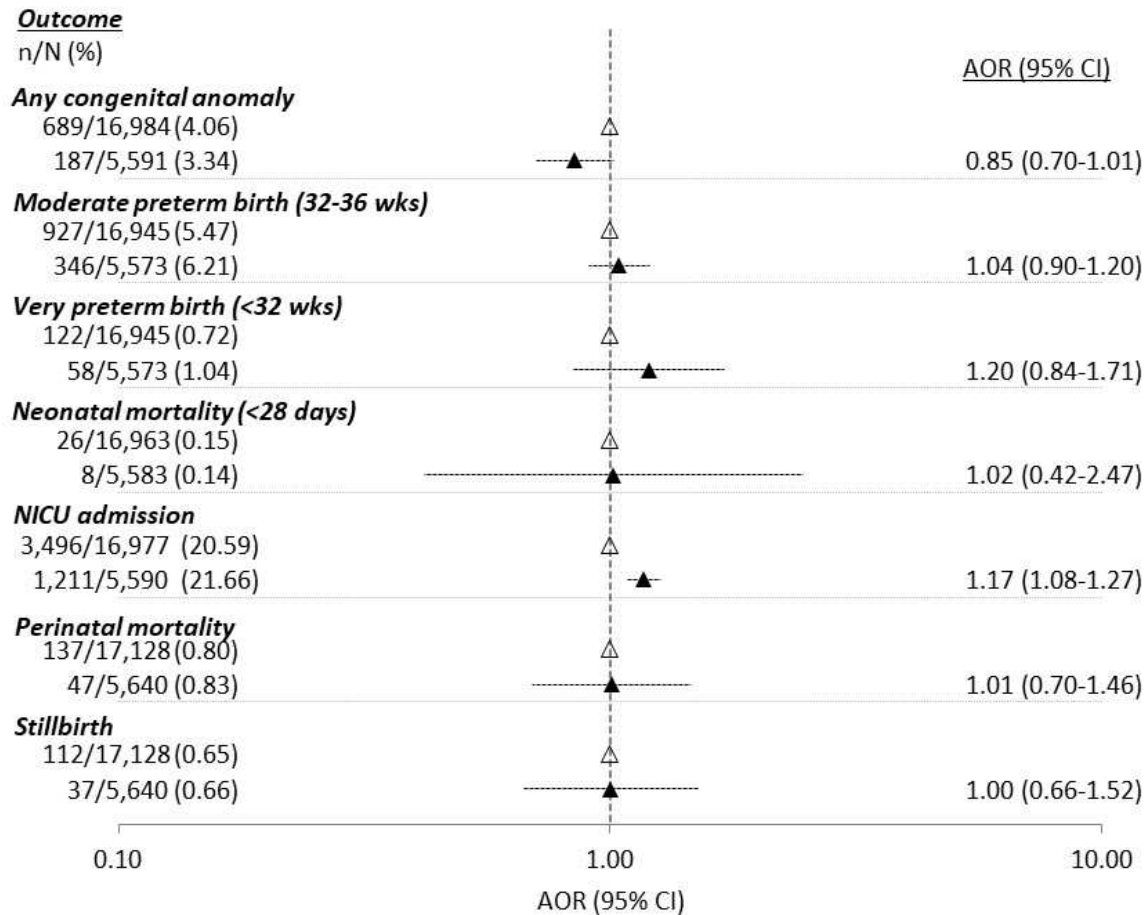

AOR – adjusted odds ratio; CI – confidence interval; NICU – neonatal intensive care unit

Wanigaratne *et al* - Supplementary Material

Refugee maternal and perinatal health in Ontario, Canada: a retrospective population-based study

**Figure S2a: Adverse maternal outcomes comparing 2,453 births to Somali refugee immigrants (▲ triangles) vs. 4,499 births to Somali non-refugee immigrants (△ triangles). Odds ratios adjusted for maternal age, parity, income quintile, official language ability, education and duration of residence.**

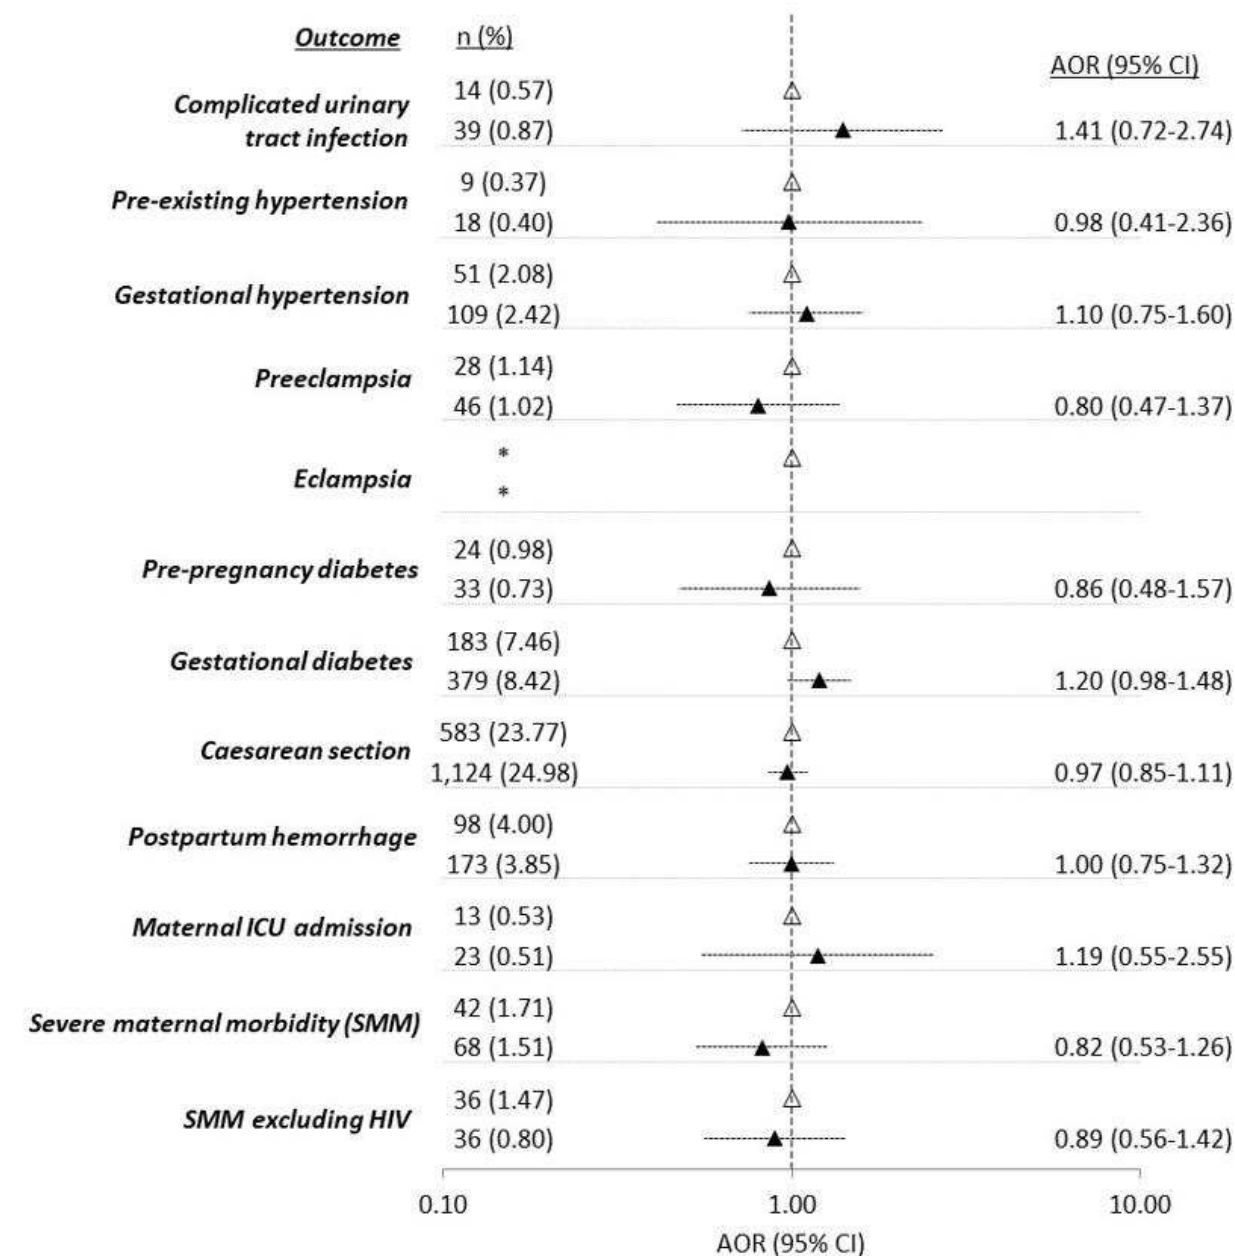

AOR – adjusted odds ratio; CI – confidence interval; ICU – intensive care unit; HIV – human immunodeficiency virus

Wanigaratne *et al* - Supplementary Material

Refugee maternal and perinatal health in Ontario, Canada: a retrospective population-based study

**Figure S2b: Adverse perinatal outcomes comparing births to Somali refugee immigrants (▲triangles) vs. births to Somali non-refugee immigrants (△triangles). Odds ratios adjusted for maternal age, parity, income quintile, official language ability, education and duration of residence.**

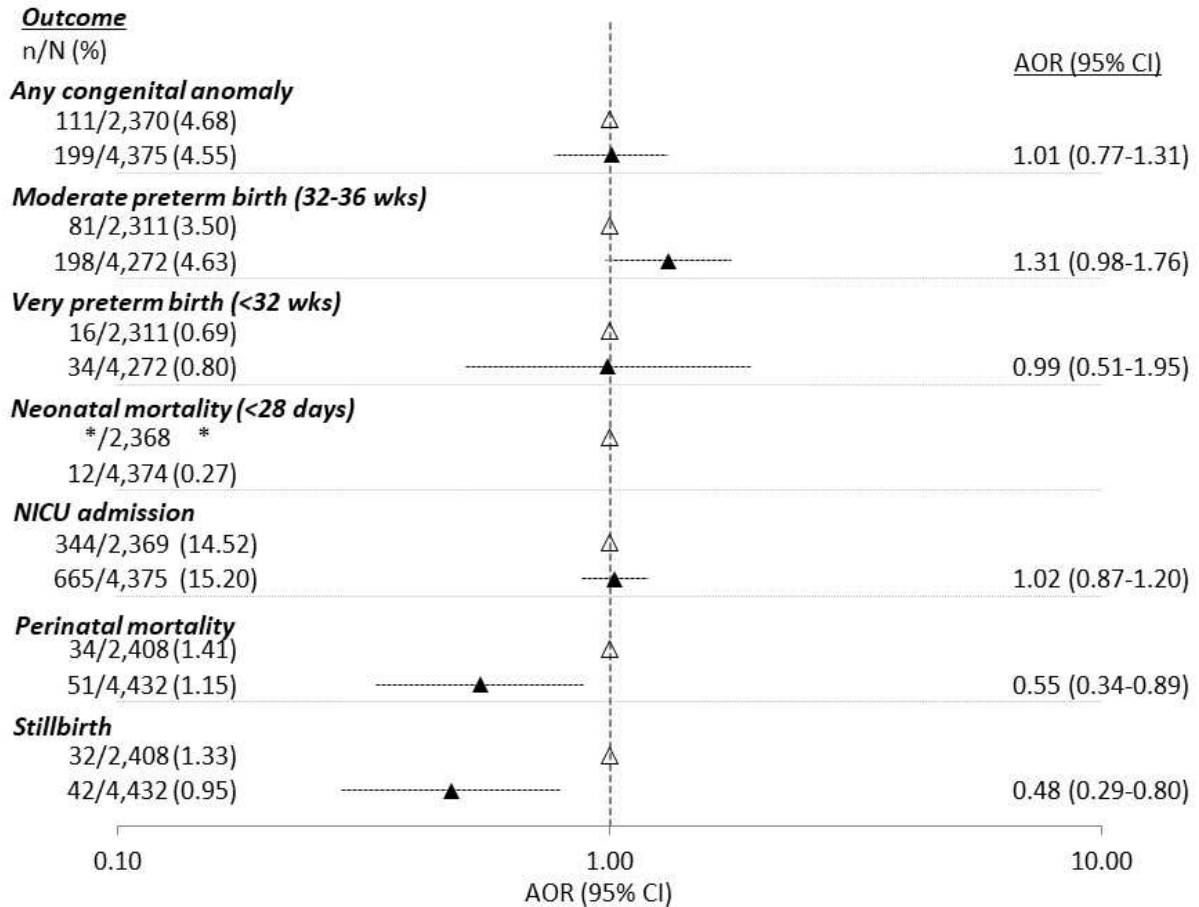

AOR – adjusted odds ratio; CI – confidence interval; NICU – neonatal intensive care unit

Wanigaratne *et al* - Supplementary Material

Refugee maternal and perinatal health in Ontario, Canada: a retrospective population-based study

**Figure S3a: Adverse maternal outcomes comparing 4,210 births to Afghan refugee immigrants (▲ triangles) vs. 3,905 births to Afghan non-refugee immigrants (△ triangles). Odds ratios adjusted for maternal age, parity, income quintile, official language ability, education and duration of residence.**

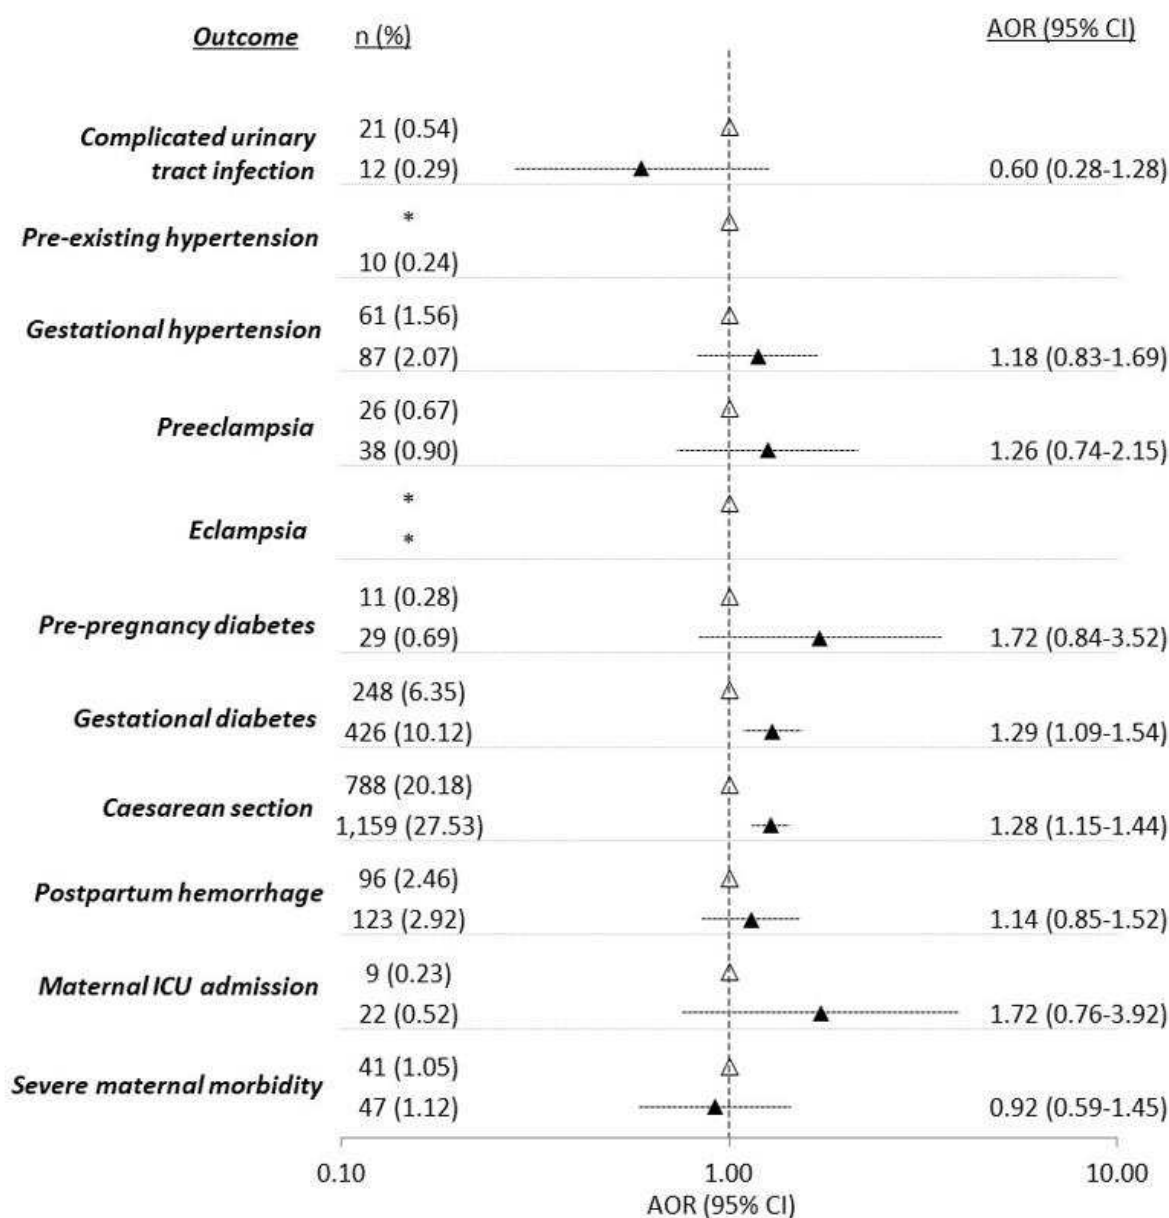

AOR – adjusted odds ratio; CI – confidence interval; ICU – intensive care unit; HIV – human immunodeficiency virus

Wanigaratne *et al* - Supplementary Material

Refugee maternal and perinatal health in Ontario, Canada: a retrospective population-based study

**Figure S3b: Adverse perinatal outcomes comparing births to Afghan refugee immigrants (▲triangles) vs. births to Afghan non-refugee immigrants (△triangles). Odds ratios adjusted for maternal age, parity, income quintile, official language ability, education and duration of residence.**

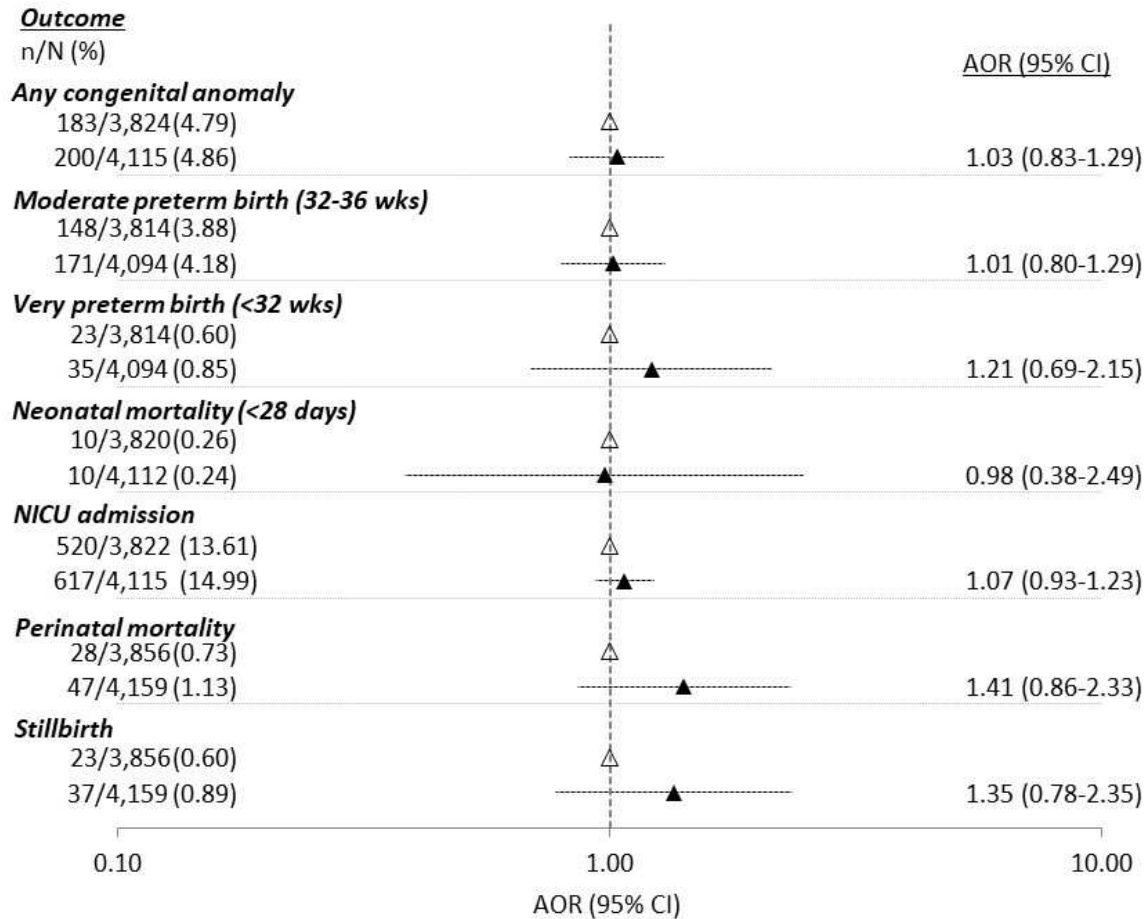

AOR – adjusted odds ratio; CI – confidence interval; NICU – neonatal intensive care unit

Wanigaratne *et al* - Supplementary Material

Refugee maternal and perinatal health in Ontario, Canada: a retrospective population-based study

**Figure S4a: Adverse maternal outcomes comparing 2,613 births to Iraqi refugee immigrants (▲ triangles) vs. 4,239 births to Iraqi non-refugee immigrants (△ triangles). Odds ratios adjusted for maternal age, parity, income quintile, official language ability, education and duration of residence.**

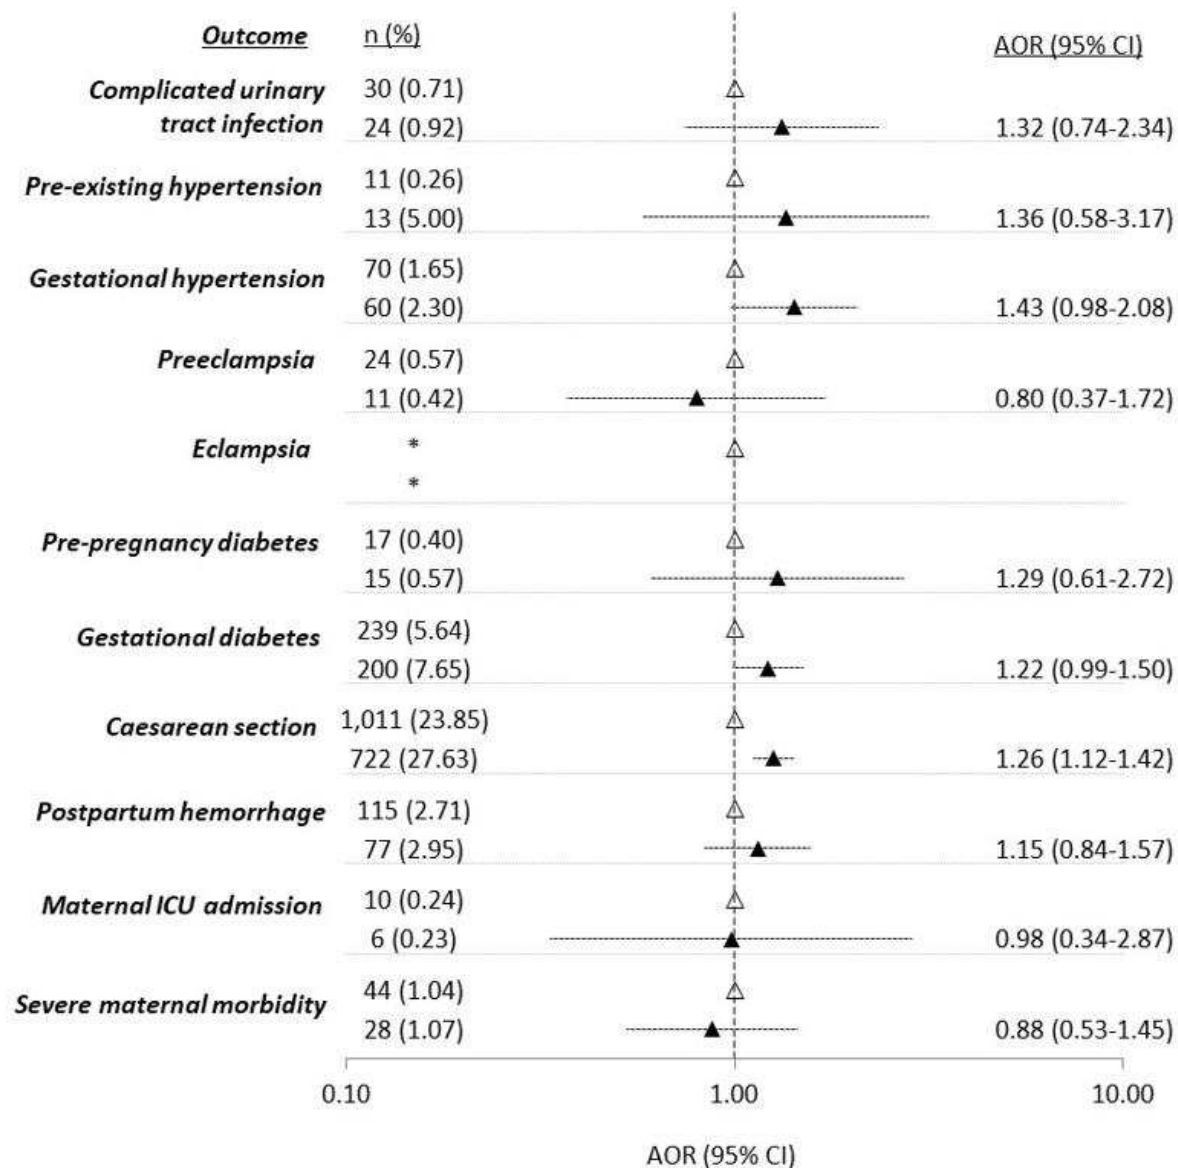

AOR – adjusted odds ratio; CI – confidence interval; ICU – intensive care unit; HIV – human immunodeficiency virus



Wanigaratne *et al* - Supplementary Material

Refugee maternal and perinatal health in Ontario, Canada: a retrospective population-based study

**Figure S4b: Adverse perinatal outcomes comparing births to Iraqi refugee immigrants (▲triangles) vs. births to Iraqi non-refugee immigrants (△triangles). Odds ratios adjusted for maternal age, parity, income quintile, official language ability, education and duration of residence.**

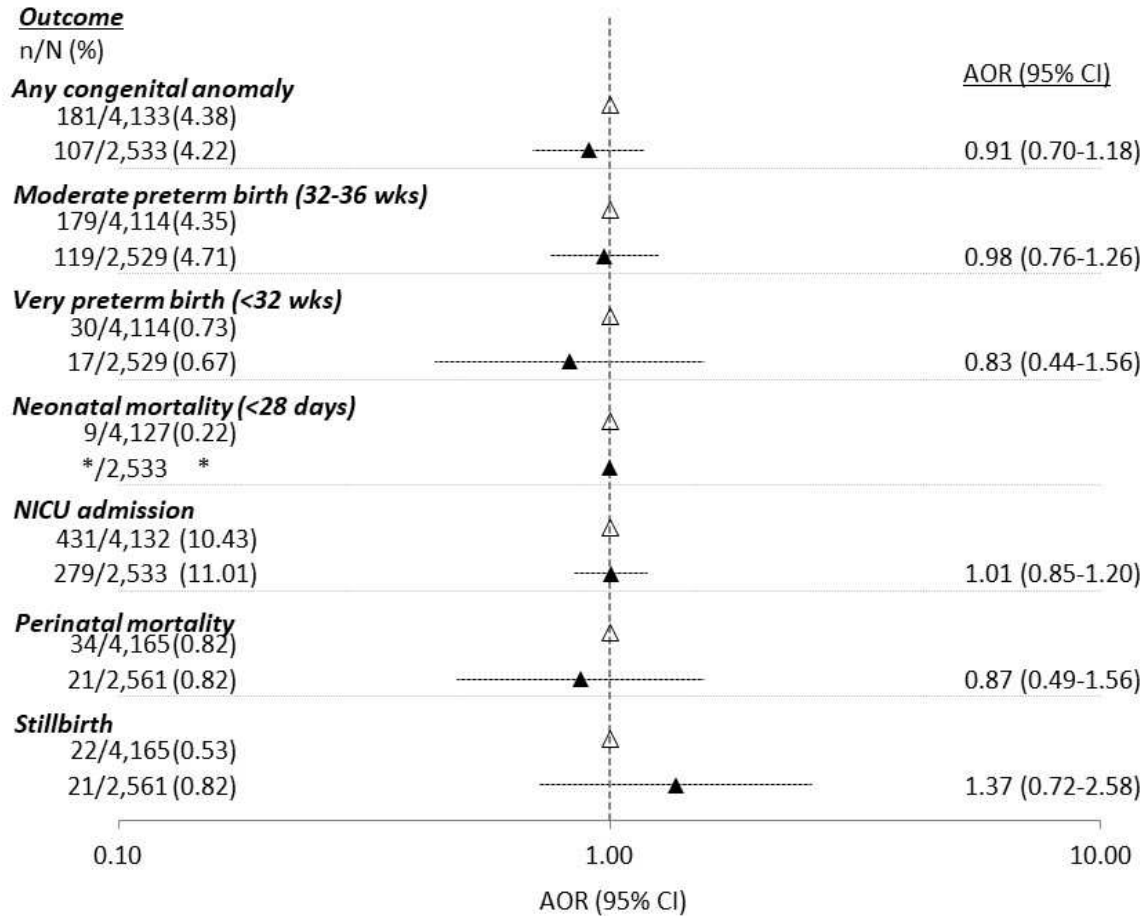

AOR – adjusted odds ratio; CI – confidence interval; NICU – neonatal intensive care unit

Wanigaratne *et al* - Supplementary Material

Refugee maternal and perinatal health in Ontario, Canada: a retrospective population-based study

**Figure S5a: Adverse maternal outcomes comparing 2,527 births to Chinese refugee immigrants (▲ triangles) vs. 37,093 births to Chinese non-refugee immigrants (△ triangles). Odds ratios adjusted for maternal age, parity, income quintile, official language ability, education and duration of residence.**

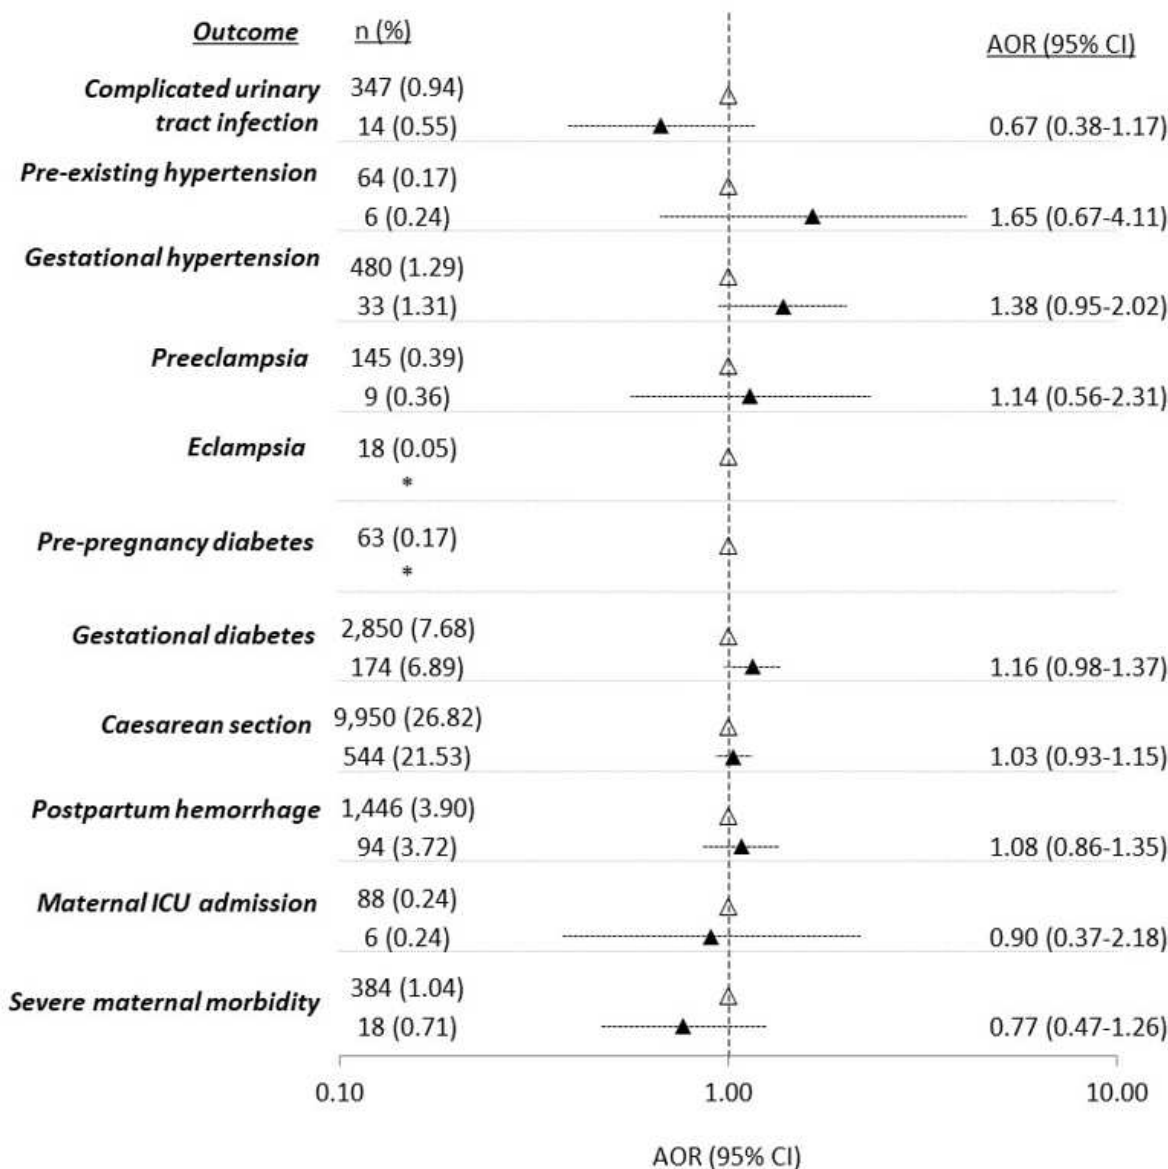

AOR – adjusted odds ratio; CI – confidence interval; ICU – intensive care unit; HIV – human immunodeficiency virus

Wanigaratne *et al* - Supplementary Material

Refugee maternal and perinatal health in Ontario, Canada: a retrospective population-based study

**Figure S5b: Adverse perinatal outcomes comparing births to Chinese refugee immigrants (▲triangles) vs. births to Chinese non-refugee immigrants (△triangles). Odds ratios adjusted for maternal age, parity, income quintile, official language ability, education and duration of residence.**

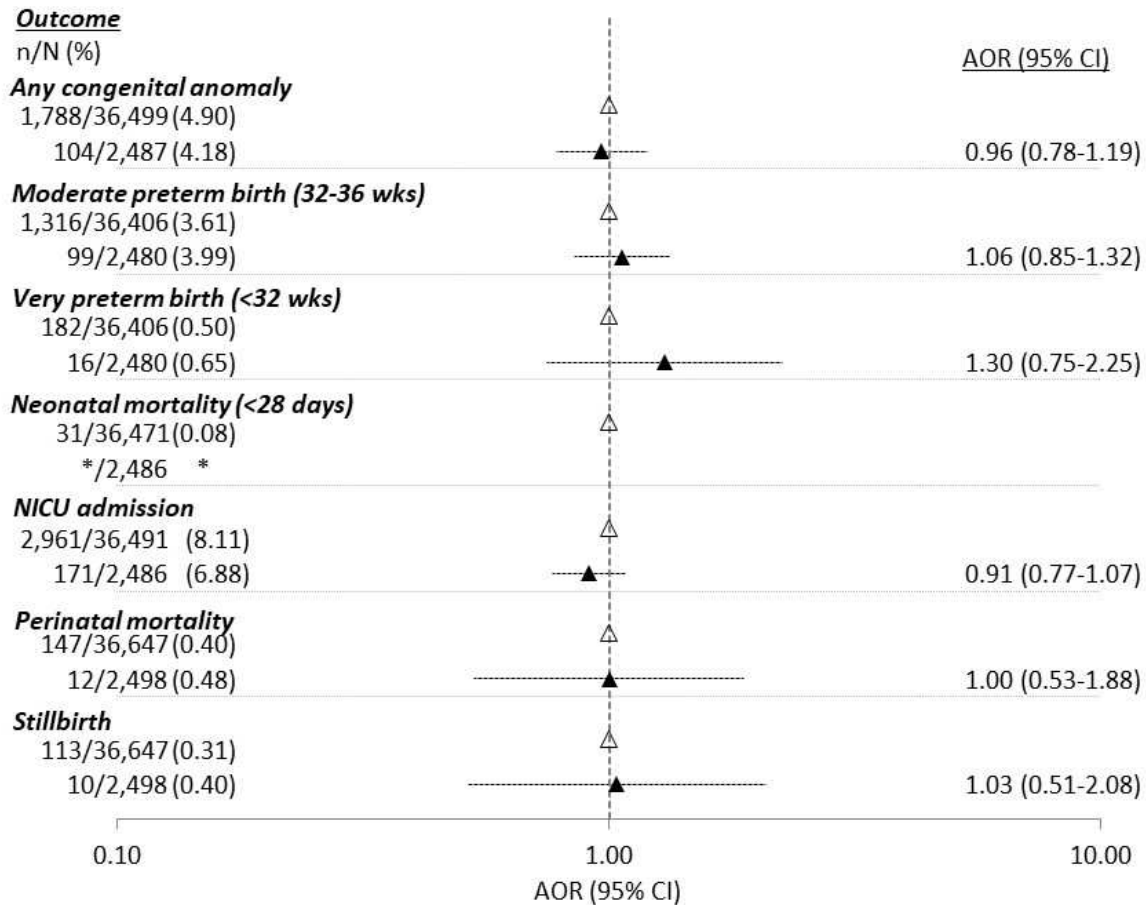

AOR – adjusted odds ratio; CI – confidence interval; NICU – neonatal intensive care unit

Wanigaratne *et al* - Supplementary Material

Refugee maternal and perinatal health in Ontario, Canada: a retrospective population-based study

**Figure S6: Adverse maternal outcomes comparing 52,158 births to ALL refugee immigrants (■ squares) vs. 358,589 births to ALL non-refugee immigrants (□ squares), UNMATCHED. Odds ratios adjusted for maternal age, parity, income quintile, official language ability, education and duration of residence.**

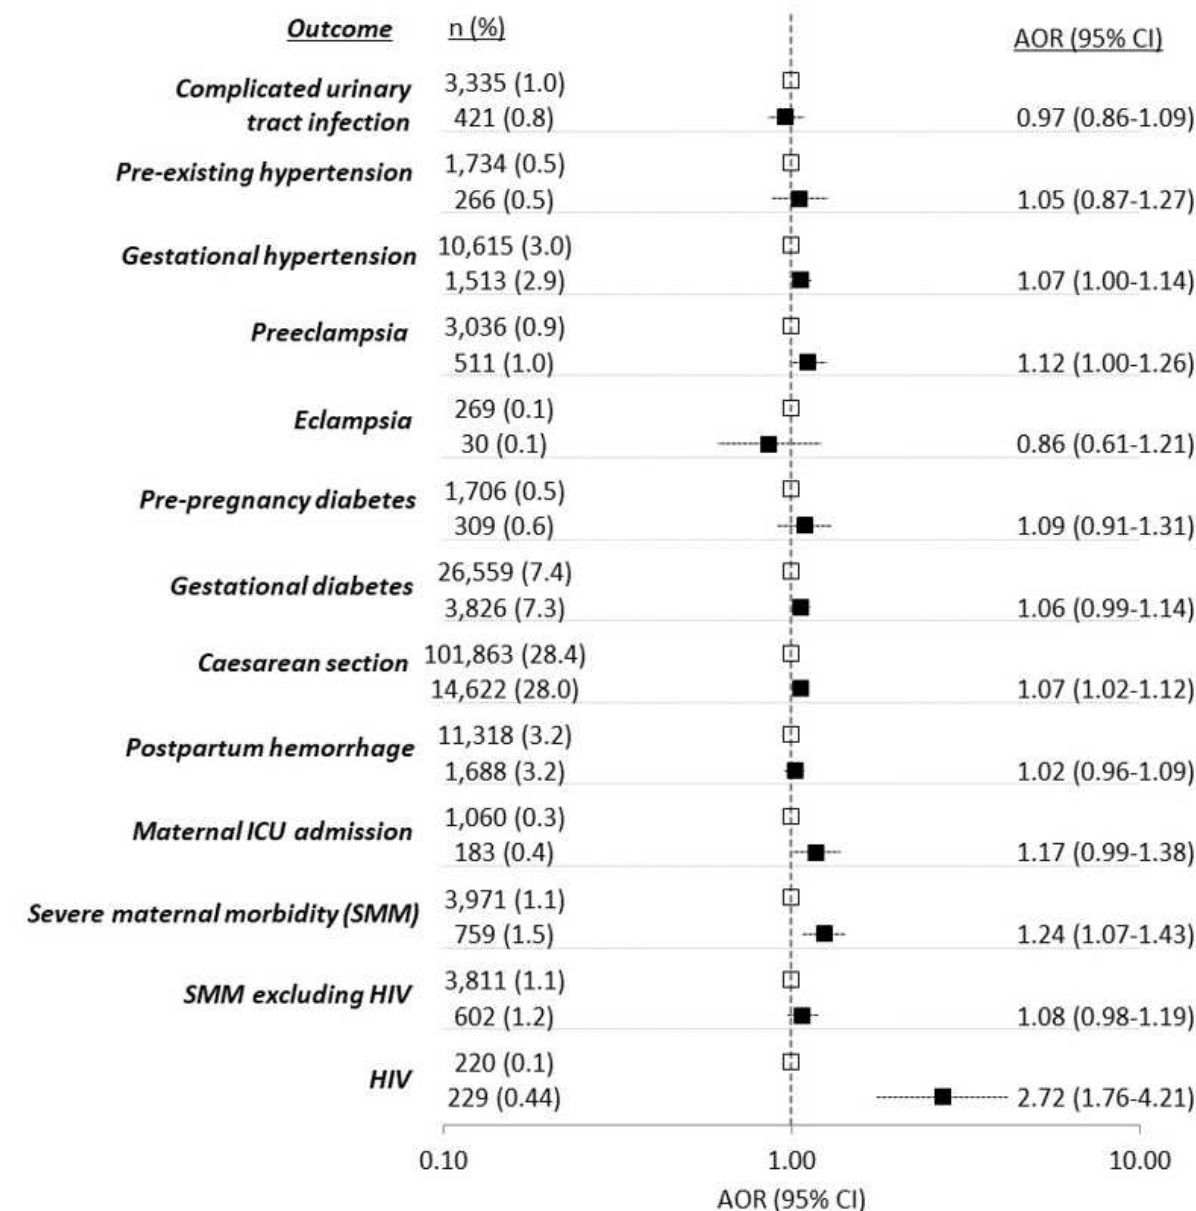

AOR – adjusted odds ratio; CI – confidence interval; ICU – intensive care unit; HIV – human immunodeficiency virus

Wanigaratne *et al* - Supplementary Material

Refugee maternal and perinatal health in Ontario, Canada: a retrospective population-based study

**Figure S7: Adverse perinatal outcomes comparing births to ALL refugee immigrants (■ squares) vs. births to ALL non-refugee immigrants (□ squares), UNMATCHED. Odds ratios adjusted for maternal age, parity, income quintile, official language ability, education and duration of residence.**

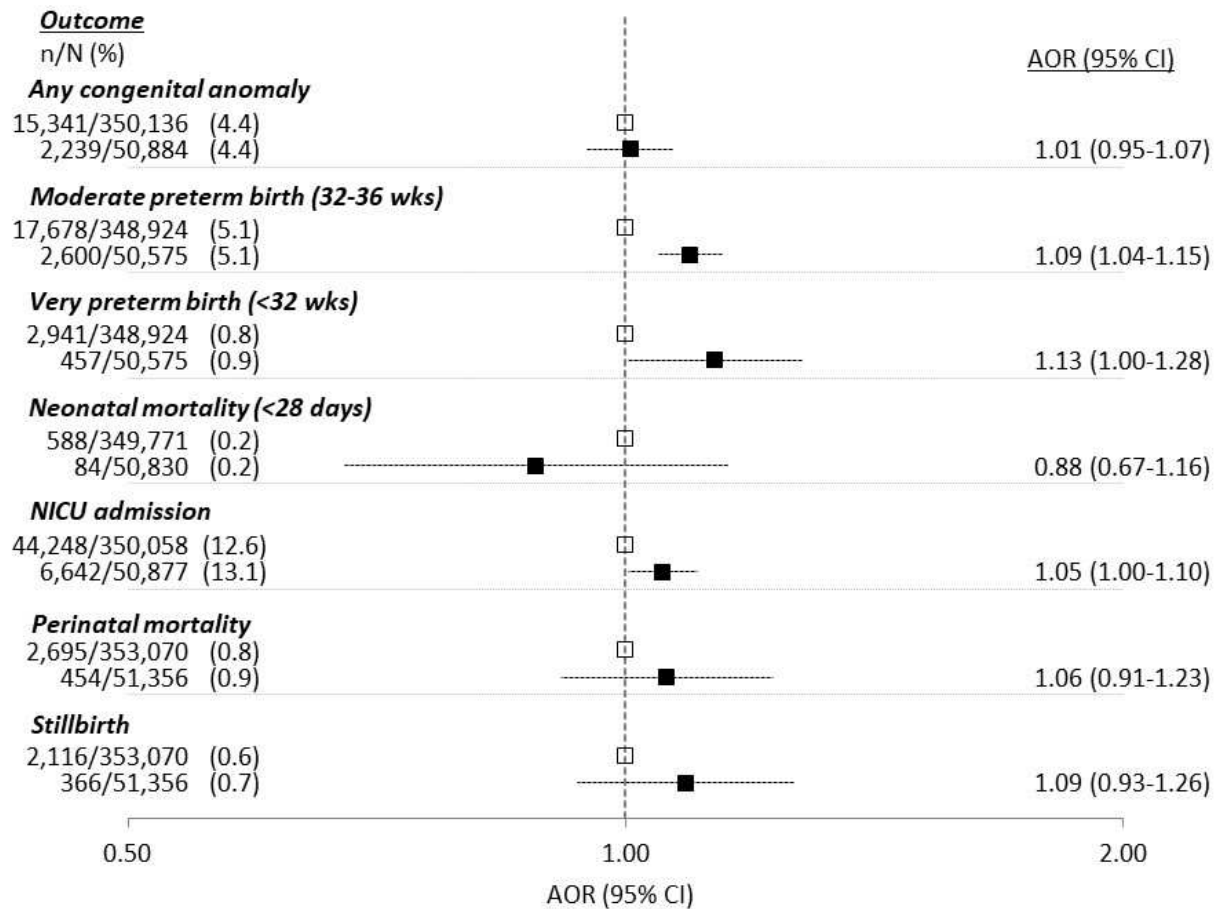

AOR – adjusted odds ratio; CI – confidence interval; NICU – neonatal intensive care unit

**STROBE 2007 (v4) Statement—Checklist of items that should be included in reports of *cohort studies***

| Section/Topic                | Item # | Recommendation                                                                                                                                                                       | Reported on page # |
|------------------------------|--------|--------------------------------------------------------------------------------------------------------------------------------------------------------------------------------------|--------------------|
| Title and abstract           | 1      | (a) Indicate the study's design with a commonly used term in the title or the abstract                                                                                               | 1                  |
|                              |        | (b) Provide in the abstract an informative and balanced summary of what was done and what was found                                                                                  | 2                  |
| <b>Introduction</b>          |        |                                                                                                                                                                                      |                    |
| Background/rationale         | 2      | Explain the scientific background and rationale for the investigation being reported                                                                                                 | 3                  |
| Objectives                   | 3      | State specific objectives, including any prespecified hypotheses                                                                                                                     | 3                  |
| <b>Methods</b>               |        |                                                                                                                                                                                      |                    |
| Study design                 | 4      | Present key elements of study design early in the paper                                                                                                                              | 3                  |
| Setting                      | 5      | Describe the setting, locations, and relevant dates, including periods of recruitment, exposure, follow-up, and data collection                                                      | 3-5                |
| Participants                 | 6      | (a) Give the eligibility criteria, and the sources and methods of selection of participants. Describe methods of follow-up                                                           | 3-4                |
|                              |        | (b) For matched studies, give matching criteria and number of exposed and unexposed                                                                                                  | 6                  |
| Variables                    | 7      | Clearly define all outcomes, exposures, predictors, potential confounders, and effect modifiers. Give diagnostic criteria, if applicable                                             | 4-6                |
| Data sources/<br>measurement | 8*     | For each variable of interest, give sources of data and details of methods of assessment (measurement). Describe comparability of assessment methods if there is more than one group | 4-5                |
| Bias                         | 9      | Describe any efforts to address potential sources of bias                                                                                                                            | 5,6                |
| Study size                   | 10     | Explain how the study size was arrived at                                                                                                                                            | 4                  |
| Quantitative variables       | 11     | Explain how quantitative variables were handled in the analyses. If applicable, describe which groupings were chosen and why                                                         | 6                  |
| Statistical methods          | 12     | (a) Describe all statistical methods, including those used to control for confounding                                                                                                | 6                  |
|                              |        | (b) Describe any methods used to examine subgroups and interactions                                                                                                                  | 6                  |
|                              |        | (c) Explain how missing data were addressed                                                                                                                                          | 6                  |
|                              |        | (d) If applicable, explain how loss to follow-up was addressed                                                                                                                       | n/a                |
|                              |        | (e) Describe any sensitivity analyses                                                                                                                                                |                    |
| <b>Results</b>               |        |                                                                                                                                                                                      |                    |

|                          |     |                                                                                                                                                                                                              |                                                                                                     |
|--------------------------|-----|--------------------------------------------------------------------------------------------------------------------------------------------------------------------------------------------------------------|-----------------------------------------------------------------------------------------------------|
| Participants             | 13* | (a) Report numbers of individuals at each stage of study—eg numbers potentially eligible, examined for eligibility, confirmed eligible, included in the study, completing follow-up, and analysed            | n/a                                                                                                 |
|                          |     | (b) Give reasons for non-participation at each stage                                                                                                                                                         | n/a                                                                                                 |
|                          |     | (c) Consider use of a flow diagram                                                                                                                                                                           |                                                                                                     |
| Descriptive data         | 14* | (a) Give characteristics of study participants (eg demographic, clinical, social) and information on exposures and potential confounders                                                                     | Page 16- Table 1                                                                                    |
|                          |     | (b) Indicate number of participants with missing data for each variable of interest                                                                                                                          | Page 16- Table 1                                                                                    |
|                          |     | (c) Summarise follow-up time (eg, average and total amount)                                                                                                                                                  | n/a                                                                                                 |
| Outcome data             | 15* | Report numbers of outcome events or summary measures over time                                                                                                                                               | All figures                                                                                         |
| Main results             | 16  | (a) Give unadjusted estimates and, if applicable, confounder-adjusted estimates and their precision (eg, 95% confidence interval). Make clear which confounders were adjusted for and why they were included | Unadjusted figures in supplementary tables S2 and S3. Confounder adjusted estimates in all figures. |
|                          |     | (b) Report category boundaries when continuous variables were categorized                                                                                                                                    | Not applicable                                                                                      |
|                          |     | (c) If relevant, consider translating estimates of relative risk into absolute risk for a meaningful time period                                                                                             | Not relevant                                                                                        |
| Other analyses           | 17  | Report other analyses done—eg analyses of subgroups and interactions, and sensitivity analyses                                                                                                               | 8-9                                                                                                 |
| <b>Discussion</b>        |     |                                                                                                                                                                                                              |                                                                                                     |
| Key results              | 18  | Summarise key results with reference to study objectives                                                                                                                                                     | 7                                                                                                   |
| <b>Limitations</b>       |     |                                                                                                                                                                                                              |                                                                                                     |
| Interpretation           | 20  | Give a cautious overall interpretation of results considering objectives, limitations, multiplicity of analyses, results from similar studies, and other relevant evidence                                   | 7-8                                                                                                 |
| Generalisability         | 21  | Discuss the generalisability (external validity) of the study results                                                                                                                                        | 9                                                                                                   |
| <b>Other information</b> |     |                                                                                                                                                                                                              |                                                                                                     |
| Funding                  | 22  | Give the source of funding and the role of the funders for the present study and, if applicable, for the original study on which the present article is based                                                | 15                                                                                                  |

\*Give information separately for cases and controls in case-control studies and, if applicable, for exposed and unexposed groups in cohort and cross-sectional studies.

1  
2  
3  
4 **Note:** An Explanation and Elaboration article discusses each checklist item and gives methodological background and published examples of transparent reporting. The STROBE  
5 checklist is best used in conjunction with this article (freely available on the Web sites of PLoS Medicine at <http://www.plosmedicine.org/>, Annals of Internal Medicine at  
6 <http://www.annals.org/>, and Epidemiology at <http://www.epidem.com/>). Information on the STROBE Initiative is available at [www.strobe-statement.org](http://www.strobe-statement.org).  
7  
8  
9  
10  
11  
12  
13  
14  
15  
16  
17  
18  
19  
20  
21  
22  
23  
24  
25  
26  
27  
28  
29  
30  
31  
32  
33  
34  
35  
36  
37  
38  
39  
40  
41  
42  
43  
44  
45  
46  
47

For peer review only
