# Supplementary material for: Refugee maternal and perinatal health in Ontario, Canada: a retrospective population-based study
Source: PubMed Central journal article supplement — BMJ Open. 2018 Apr 10;8(4):e018979. doi: 10.1136/bmjopen-2017-018979 (PMC5898303; doi:10.1136/bmjopen-2017-018979), 2018-04-10
Supplement: bmjopen-2017-018979supp001.pdf [file bmjopen-2017-018979supp001.pdf]

## SUPPLEMENTARY TABLES

Table S1: List of 10th revision of the *International Statistical Classification of Diseases and Related Health Problems*, Canadian enhancement, and *Canadian Classification of Health Interventions* (ICD-10-CA/CCI) codes for maternal and perinatal outcomes

| Maternal or Perinatal Outcome                 | Definition                                                                 | Source Database | ICD-10-CA/CCI                                              |
|-----------------------------------------------|----------------------------------------------------------------------------|-----------------|------------------------------------------------------------|
| Complicated urinary tract infection           |                                                                            | CIHI-DAD        | O23, O86, N39                                              |
| Pre-existing hypertension                     |                                                                            | CIHI-DAD        | O10, O11                                                   |
| Gestational hypertension                      |                                                                            | CIHI-DAD        | O13                                                        |
| Preeclampsia                                  |                                                                            |                 | O14                                                        |
| Eclampsia                                     |                                                                            | CIHI-DAD        | O15                                                        |
| Pre-pregnancy diabetes mellitus               |                                                                            | CIHI-DAD        | O24.0-O24.3                                                |
| Gestational diabetes mellitus (GDM)           |                                                                            | CIHI-DAD        | O24.4                                                      |
| Caesarean delivery                            |                                                                            | CIHI-DAD        | 5.MD.60.^                                                  |
| Post-partum hemorrhage                        |                                                                            | CIHI-DAD        | O72                                                        |
| Maternal intensive care unit (ICU) admission  |                                                                            | CIHI-DAD        | Special Care Unit 1-6                                      |
| Severe maternal morbidity                     |                                                                            | CIHI-DAD        | See Joseph et al, 2010*                                    |
| HIV                                           | Three physician diagnoses within three years.                              | Ontario HIV DB  |                                                            |
| Congenital anomaly                            | An abnormality of structure or function present at birth                   | CIHI-DAD        | ICD-10: Q00-Q99                                            |
| Moderate preterm birth (PTB)                  | Live birth with gestational age 32-36 weeks                                | CIHI-DAD        | 32-36 weeks gestation recorded on CIHI-DAD birth record    |
| Very preterm birth (VPTB)                     | Live birth with gestational age <32 weeks                                  | CIHI-DAD        | < 32 weeks gestation recorded on CIHI-DAD birth record     |
| Neonatal mortality                            | Death <28 days of life                                                     | RPDB, ORG-VSD   |                                                            |
| Neonatal intensive care unit (NICU) admission |                                                                            | CIHI-DAD        | Special care unit admission, any level                     |
| Perinatal mortality                           | Stillbirth or death of live born infant < 7 days of life                   | RPDB, ORG-VSD   |                                                            |
| Stillbirth                                    | Intrauterine fetal death $\geq$ 20 weeks gestation and > 500 g birthweight | CIHI-DAD        | Maternal record: Z371, Z373-7, O364.<br>Infant record: P95 |

## Abbreviations

ICD-10-CA/CCI - 10th revision of the *International Statistical Classification of Diseases and Related Health Problems*, Canadian enhancement, and *Canadian Classification of Health Interventions* (ICD-10-CA/CCI)

CIHI-DAD – Canadian Institute for Health Information – Discharge Abstract Database

RPDB – Registered Persons Database (referred to as “Ontario Health Care Registry” in paper)

ORG-VSD – Office of the Registrar General’s Vital Statistics-Death Registry

\* Joseph KS, Liu S, Rouleau J, Kirby RS, Kramer MS, Sauve R, et al. Severe maternal morbidity in Canada, 2003 to 2007: surveillance using routine hospitalization data and ICD-10CA codes. *J Obstet Gynaecol Can.* 2010;32(9):837

Table S2: Unadjusted Odds Ratios (OR) (95% CI) for Figures 1 and 2

| <b>FIGURE 1</b>                        |                               |
|----------------------------------------|-------------------------------|
| <b>OUTCOME</b>                         | <b>UNADJUSTED OR (95% CI)</b> |
| Complicated urinary tract infection    | 0.88 (0.75-1.04)              |
| Pre-existing hypertension              | 1.32 (1.03-1.69)              |
| Gestational hypertension               | 1.09 (0.99-1.20)              |
| Preeclampsia                           | 0.97 (0.83-1.13)              |
| Eclampsia                              | 0.96 (0.53-1.72)              |
| Pre-pregnancy diabetes mellitus        | 1.22 (0.96-1.55)              |
| Gestational diabetes mellitus (GDM)    | 1.17 (1.09-1.25)              |
| Caesarean delivery                     | 1.03 (0.99-1.07)              |
| Post-partum hemorrhage                 | 1.00 (0.91-1.09)              |
| Maternal intensive care unit admission | 1.31 (0.98-1.75)              |
| Severe maternal morbidity (SMM)        | 1.12 (0.97-1.28)              |
| SMM excluding HIV                      | 1.04 (0.89-1.20)              |
| HIV                                    | 2.06 (1.48-2.85)              |
| <b>FIGURE 2</b>                        |                               |
| <b>OUTCOME</b>                         | <b>UNADJUSTED OR (95% CI)</b> |
| Congenital anomaly                     | 0.93 (0.86-1.01)              |
| Moderate preterm birth (MPTB)          | 1.11 (1.03-1.20)              |
| Very preterm birth (VPTB)              | 1.13 (0.95-1.34)              |
| Neonatal mortality                     | 1.00 (0.68-1.48)              |
| Neonatal intensive care unit admission | 1.02 (0.97-1.07)              |
| Perinatal mortality                    | 1.15 (0.96-1.37)              |
| Stillbirth                             | 1.10 (0.91-1.34)              |

Table S3: Unadjusted Odds Ratios (OR) (95% CI) for Figures 3 and 4

| <b>FIGURE 3</b>                               | <b>UNADJUSTED OR (95% CI)</b> |                             |
|-----------------------------------------------|-------------------------------|-----------------------------|
|                                               | <b>REFUGEES VS. CDN</b>       | <b>NON-REFUGEES VS. CDN</b> |
| <b>OUTCOME</b>                                |                               |                             |
| Complicated urinary tract infection           | 0.66 (0.60-0.73)              | 0.76 (0.73-0.79)            |
| Pre-existing hypertension                     | 0.92 (0.81-1.05)              | 0.86 (0.81-0.91)            |
| Gestational hypertension                      | 0.65 (0.62-0.69)              | 0.67 (0.65-0.68)            |
| Preeclampsia                                  | 0.83 (0.76-0.91)              | 0.72 (0.69-0.75)            |
| Eclampsia                                     | 0.58 (0.40-0.84)              | 0.76 (0.66-0.87)            |
| Pre-pregnancy diabetes mellitus               | 0.90 (0.79-1.02)              | 0.72 (0.67-0.76)            |
| Gestational diabetes mellitus (GDM)           | 2.38 (2.29-2.47)              | 2.40 (2.36-2.45)            |
| Caesarean delivery                            | 1.05 (1.02-1.07)              | 1.07 (1.06-1.09)            |
| Post-partum hemorrhage (PPH)                  | 0.79 (0.75-0.84)              | 0.78 (0.76-0.79)            |
| Maternal intensive care unit admission        | 1.47 (1.26-1.71)              | 1.24 (1.15-1.33)            |
| Severe maternal morbidity (SMM)               | 1.30 (1.20-1.41)              | 0.98 (0.95-1.02)            |
| SMM without HIV                               | 1.04 (0.96-1.13)              | 0.96 (0.92-0.99)            |
| HIV                                           | 13.91 (11.37-17.01)           | 1.85 (1.51-2.26)            |
| <b>FIGURE 4</b>                               |                               |                             |
| <b>OUTCOME</b>                                |                               |                             |
| Congenital anomaly                            | 0.88 (0.84-0.92)              | 0.88 (0.86-0.89)            |
| Moderate preterm birth (MPTB)                 | 0.92 (0.88-0.96)              | 0.90 (0.88-0.92)            |
| Very preterm birth (VPTB)                     | 1.16 (1.06-1.28)              | 1.08 (1.03-1.13)            |
| Neonatal mortality                            | 1.08 (0.87-1.35)              | 1.10 (1.00-1.21)            |
| Neonatal intensive care unit (NICU) admission | 1.15 (1.12-1.19)              | 1.11 (1.10-1.13)            |
| Perinatal mortality                           | 1.37 (1.24-1.51)              | 1.17 (1.12-1.23)            |
| Stillbirth                                    | 1.41 (1.26-1.57)              | 1.18 (1.12-1.24)            |

SUPPLEMENTARY FIGURES

**Figure S1a: Adverse maternal outcomes comparing 5,724 births to Sri Lankan refugee immigrants (▲ triangles) vs. 17,373 births to Sri Lankan non-refugee immigrants (△ triangles). Odds ratios adjusted for maternal age, parity, income quintile, official language ability, education and duration of residence.**

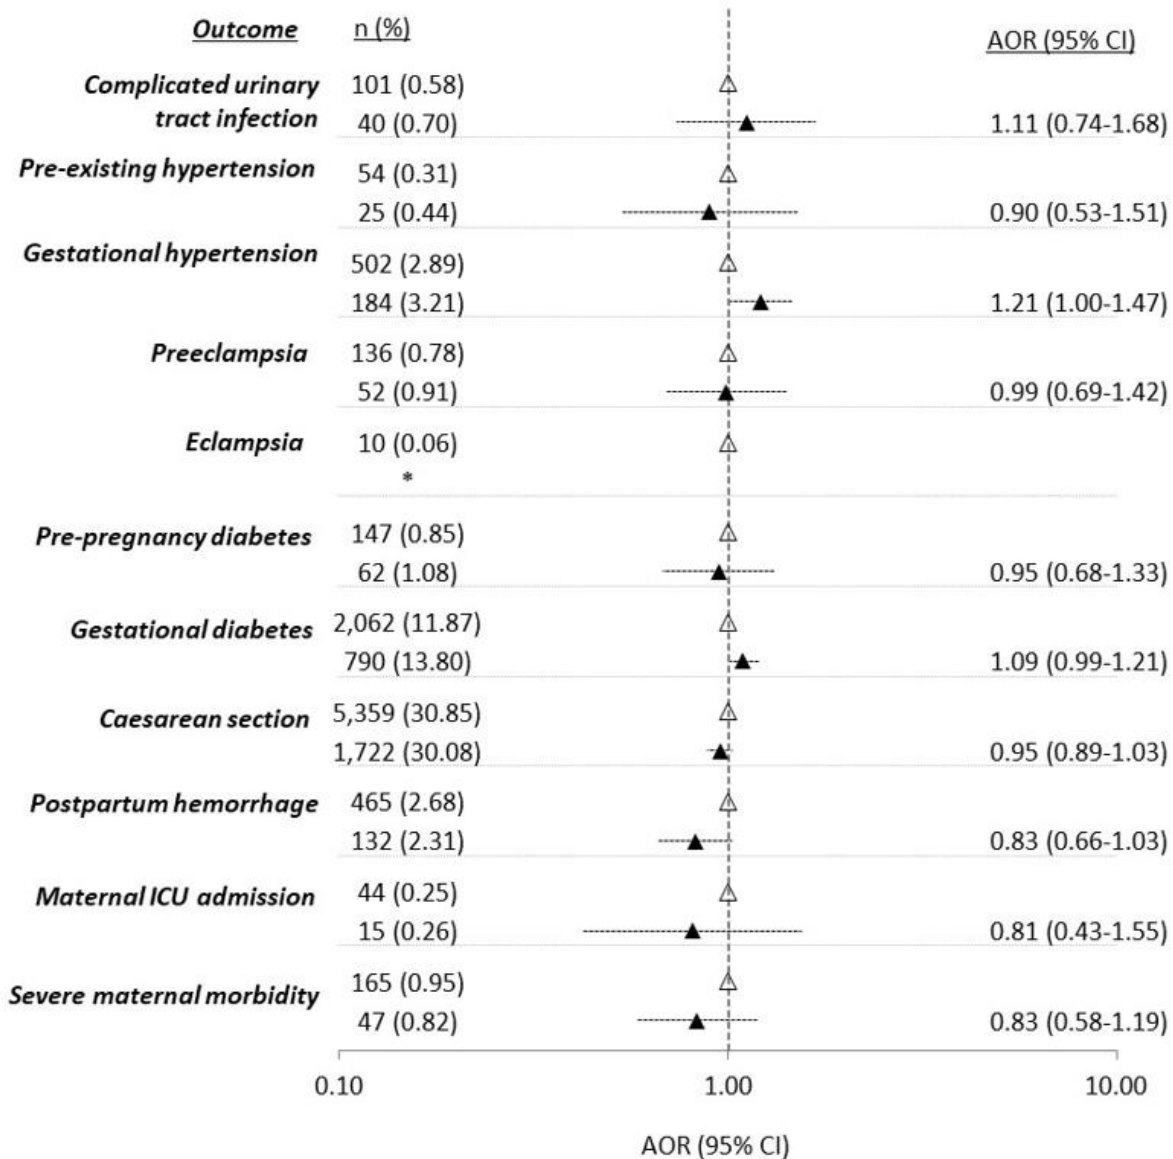

AOR – adjusted odds ratio; CI – confidence interval; ICU – intensive care unit; HIV – human immunodeficiency virus

**Figure S1b: Adverse perinatal outcomes comparing births to Sri Lankan refugee immigrants (▲ triangles) vs. births to Sri Lankan non-refugee immigrants (△ triangles). Odds ratios adjusted for maternal age, parity, income quintile, official language ability, education and duration of residence.**

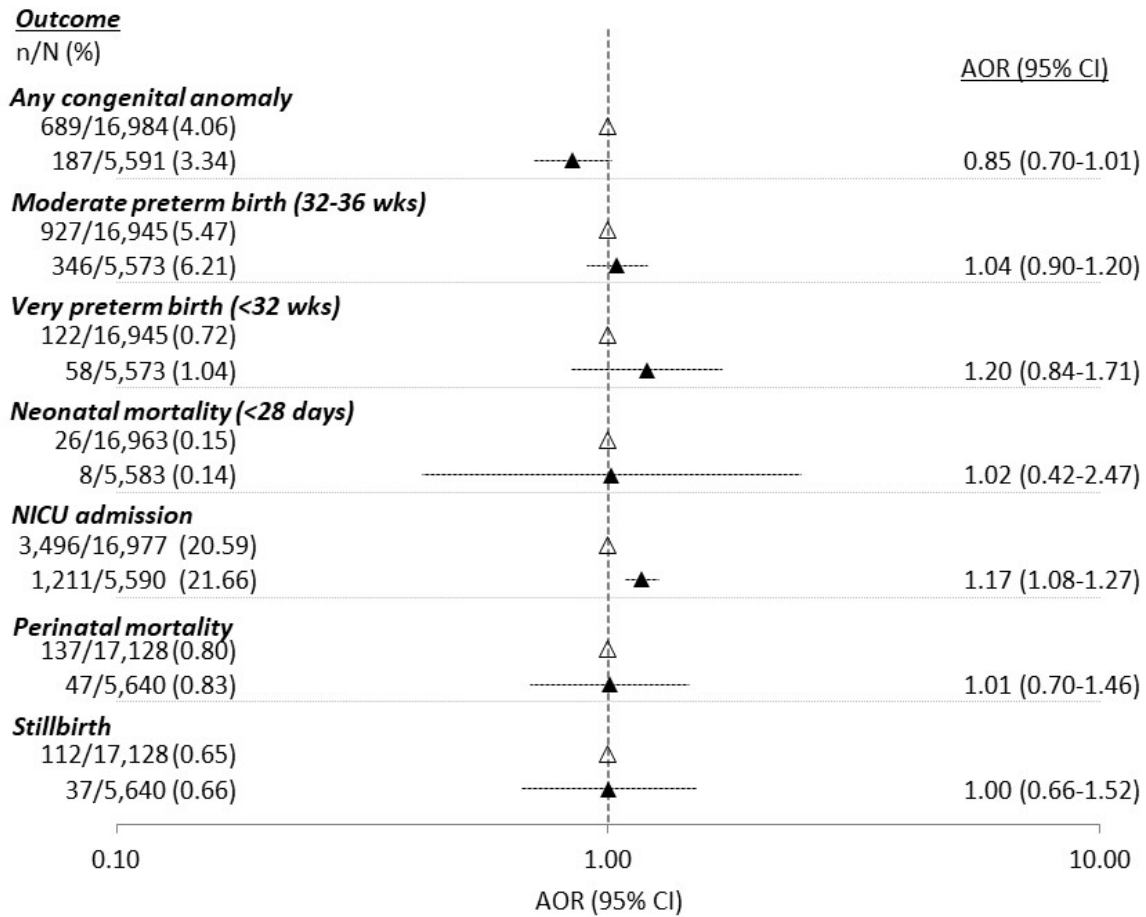

AOR – adjusted odds ratio; CI – confidence interval; NICU – neonatal intensive care unit

**Figure S2a: Adverse maternal outcomes comparing 2,453 births to Somali refugee immigrants (▲ triangles) vs. 4,499 births to Somali non-refugee immigrants (△ triangles). Odds ratios adjusted for maternal age, parity, income quintile, official language ability, education and duration of residence.**

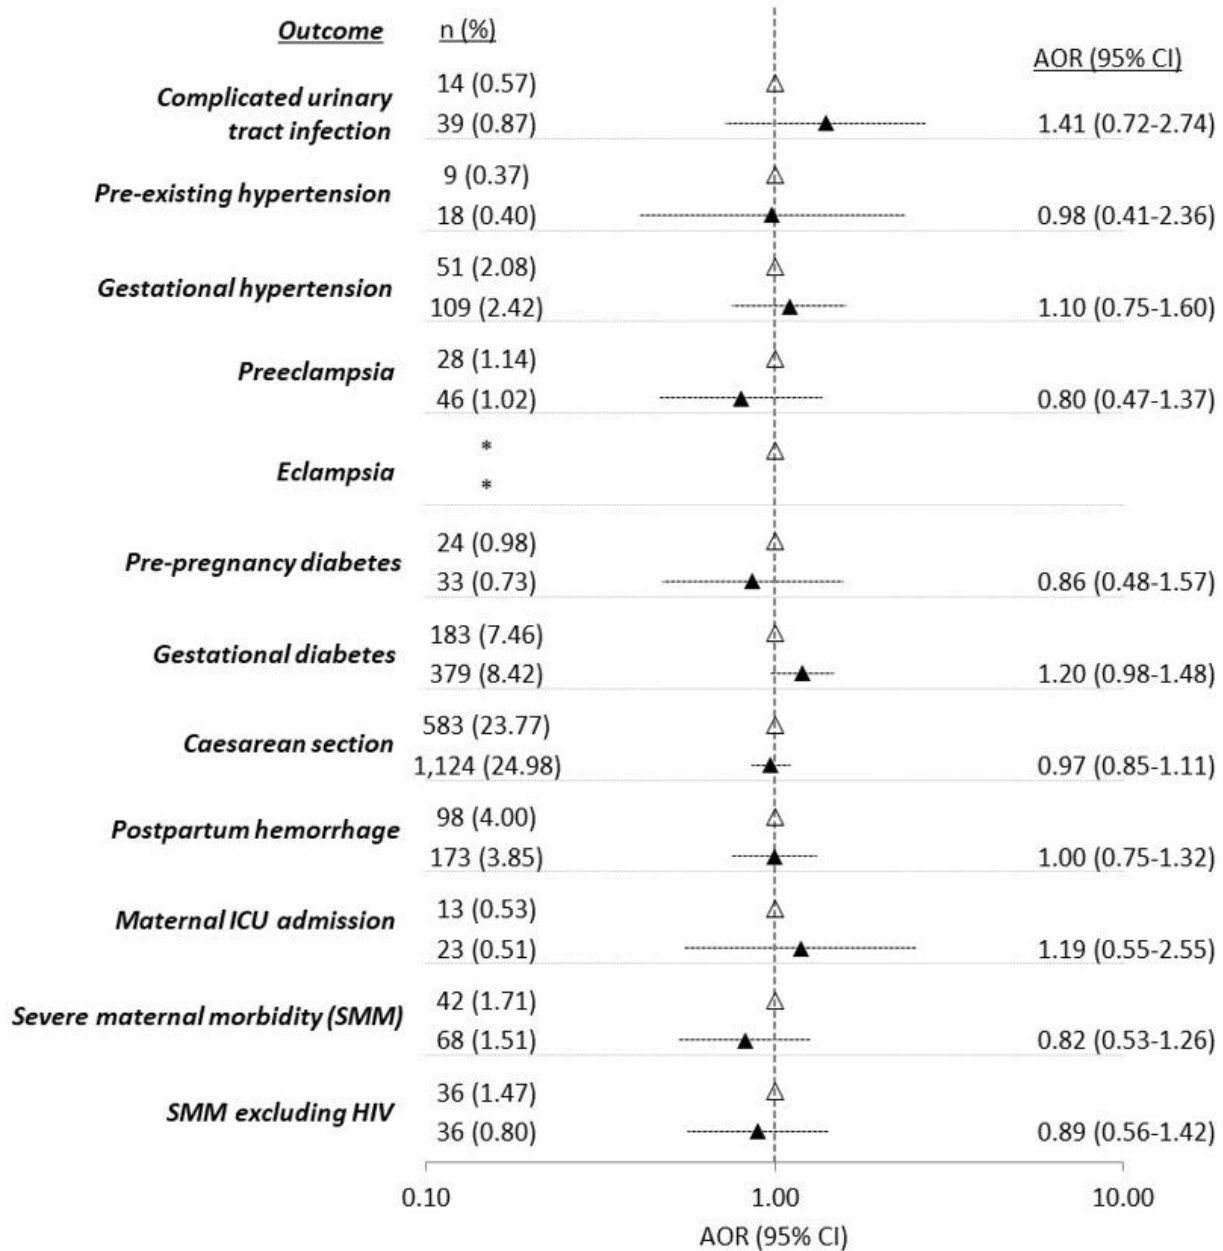

AOR – adjusted odds ratio; CI – confidence interval; ICU – intensive care unit; HIV – human immunodeficiency virus

**Figure S2b: Adverse perinatal outcomes comparing births to Somali refugee immigrants ( ▲triangles) vs. births to Somali non-refugee immigrants ( Δtriangles). Odds ratios adjusted for maternal age, parity, income quintile, official language ability, education and duration of residence.**

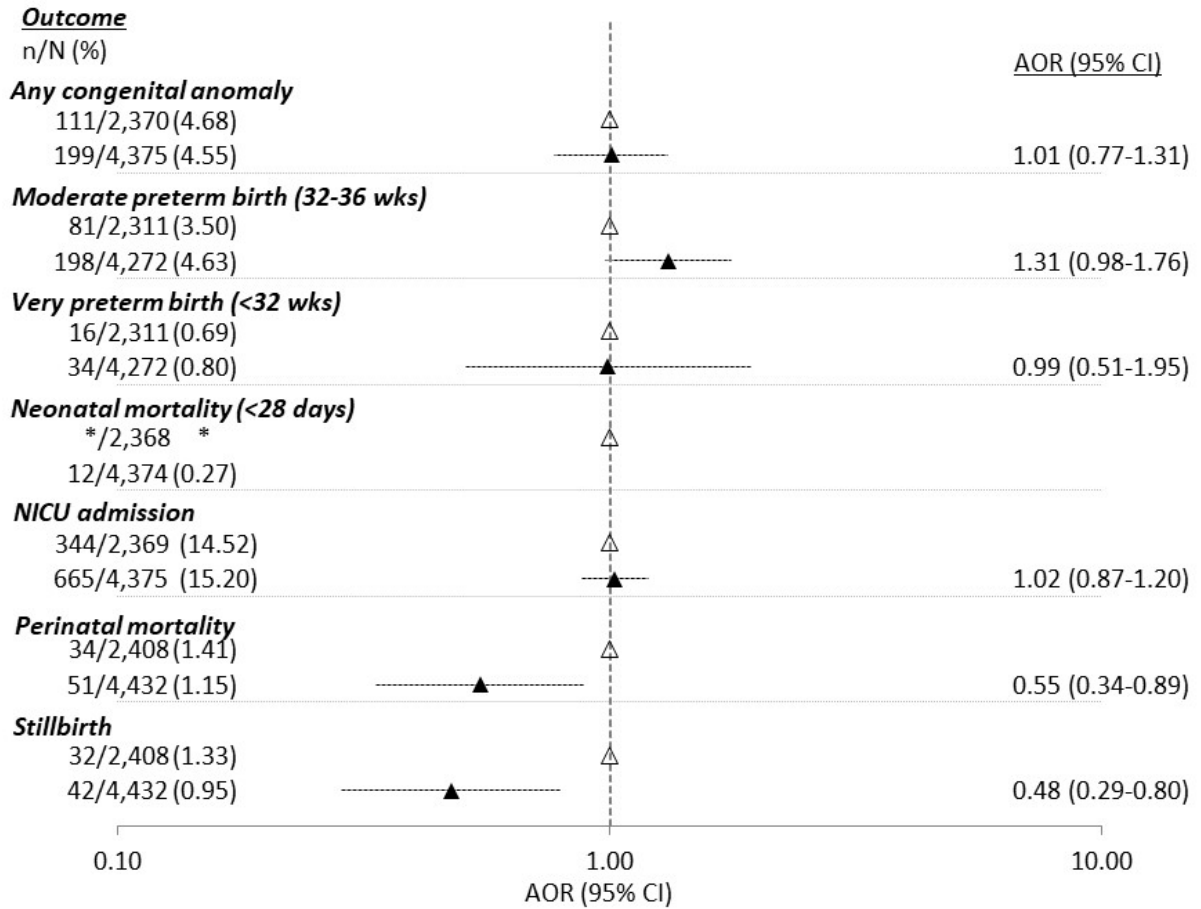

AOR – adjusted odds ratio; CI – confidence interval; NICU – neonatal intensive care unit

**Figure S3a: Adverse maternal outcomes comparing 4,210 births to Afghan refugee immigrants (▲ triangles) vs. 3,905 births to Afghan non-refugee immigrants (△ triangles). Odds ratios adjusted for maternal age, parity, income quintile, official language ability, education and duration of residence.**

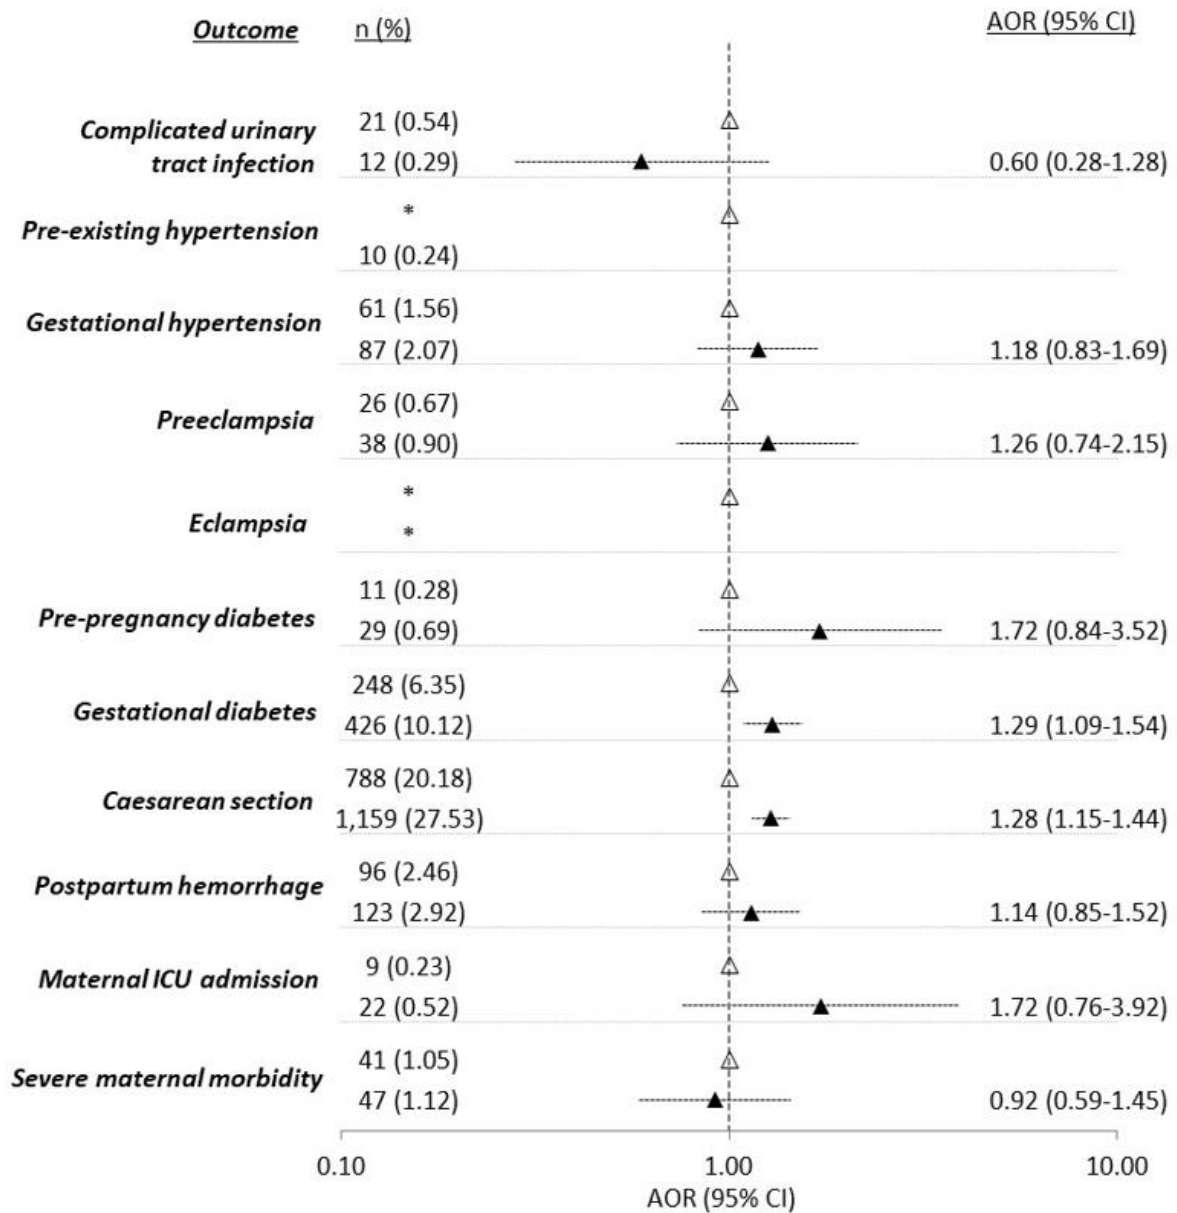

AOR – adjusted odds ratio; CI – confidence interval; ICU – intensive care unit; HIV – human immunodeficiency virus



**Figure S3b: Adverse perinatal outcomes comparing births to Afghan refugee immigrants (▲triangles) vs. births to Afghan non-refugee immigrants (△triangles). Odds ratios adjusted for maternal age, parity, income quintile, official language ability, education and duration of residence.**

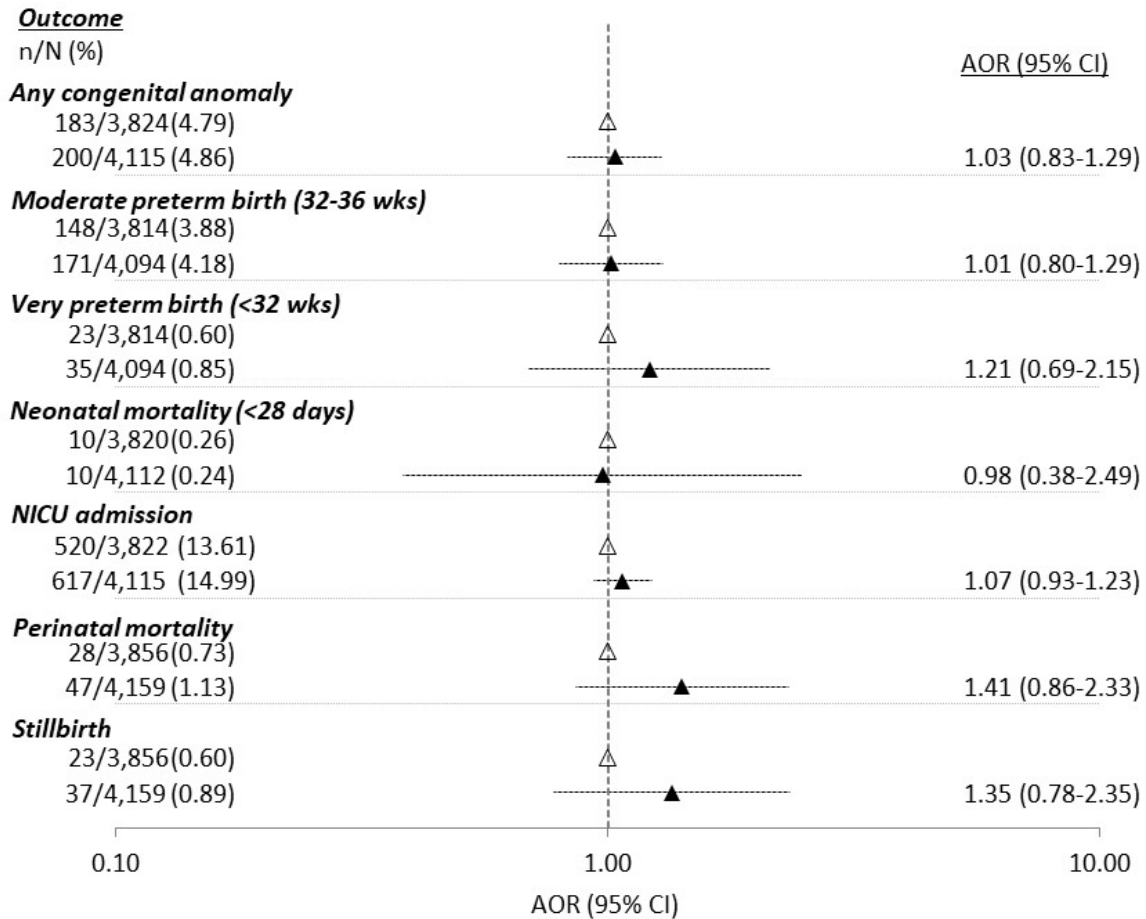

AOR – adjusted odds ratio; CI – confidence interval; NICU – neonatal intensive care unit

**Figure S4a: Adverse maternal outcomes comparing 2,613 births to Iraqi refugee immigrants (▲ triangles) vs. 4,239 births to Iraqi non-refugee immigrants (△ triangles). Odds ratios adjusted for maternal age, parity, income quintile, official language ability, education and duration of residence.**

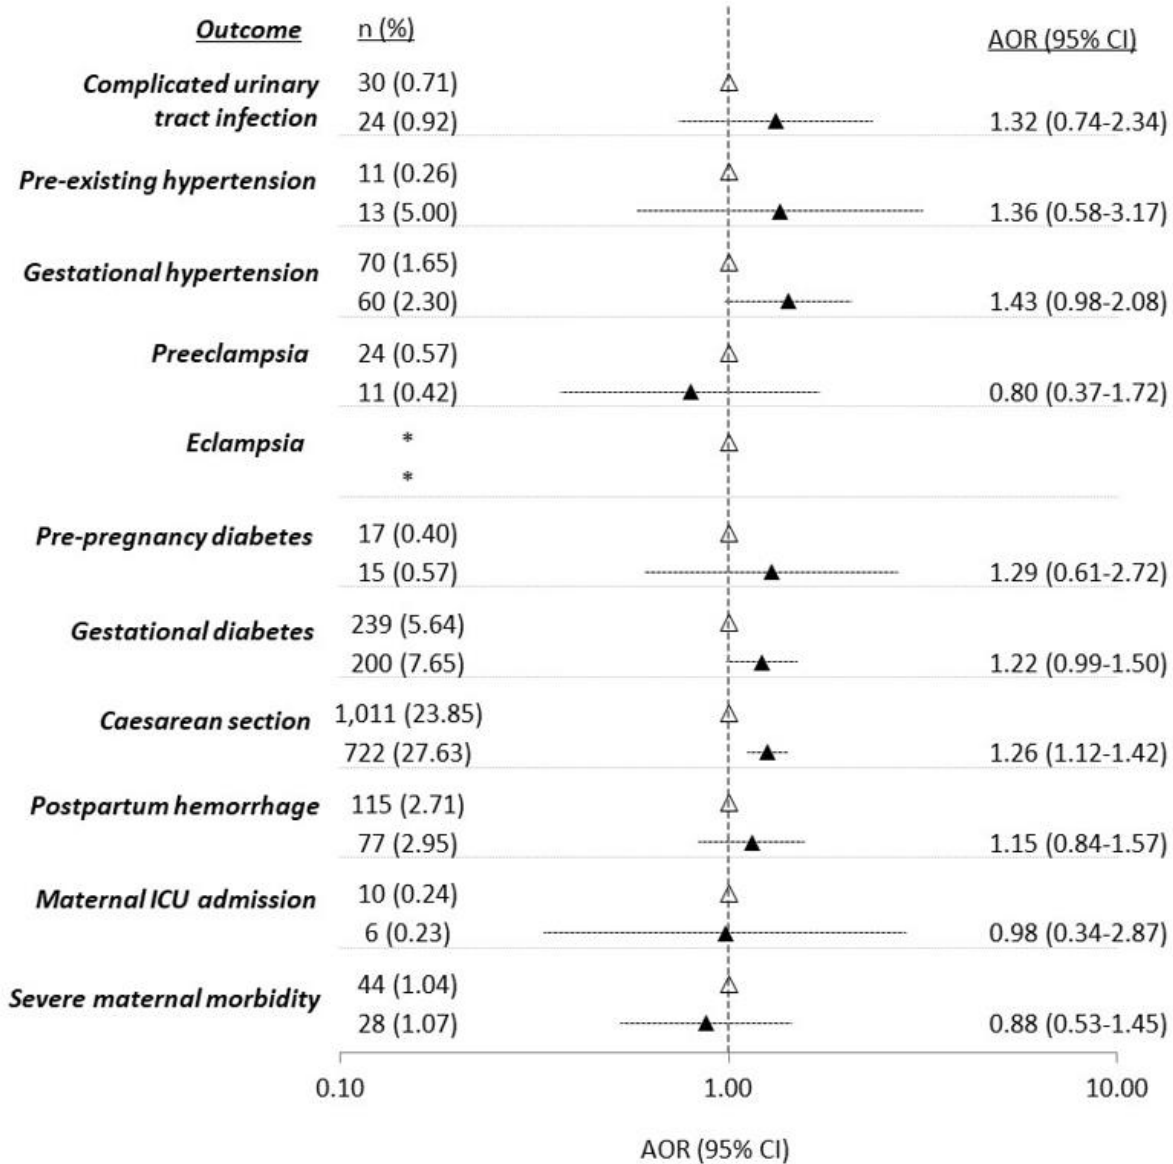

AOR – adjusted odds ratio; CI – confidence interval; ICU – intensive care unit; HIV – human immunodeficiency virus

**Figure S4b: Adverse perinatal outcomes comparing births to Iraqi refugee immigrants (▲triangles) vs. births to Iraqi non-refugee immigrants (△triangles). Odds ratios adjusted for maternal age, parity, income quintile, official language ability, education and duration of residence.**

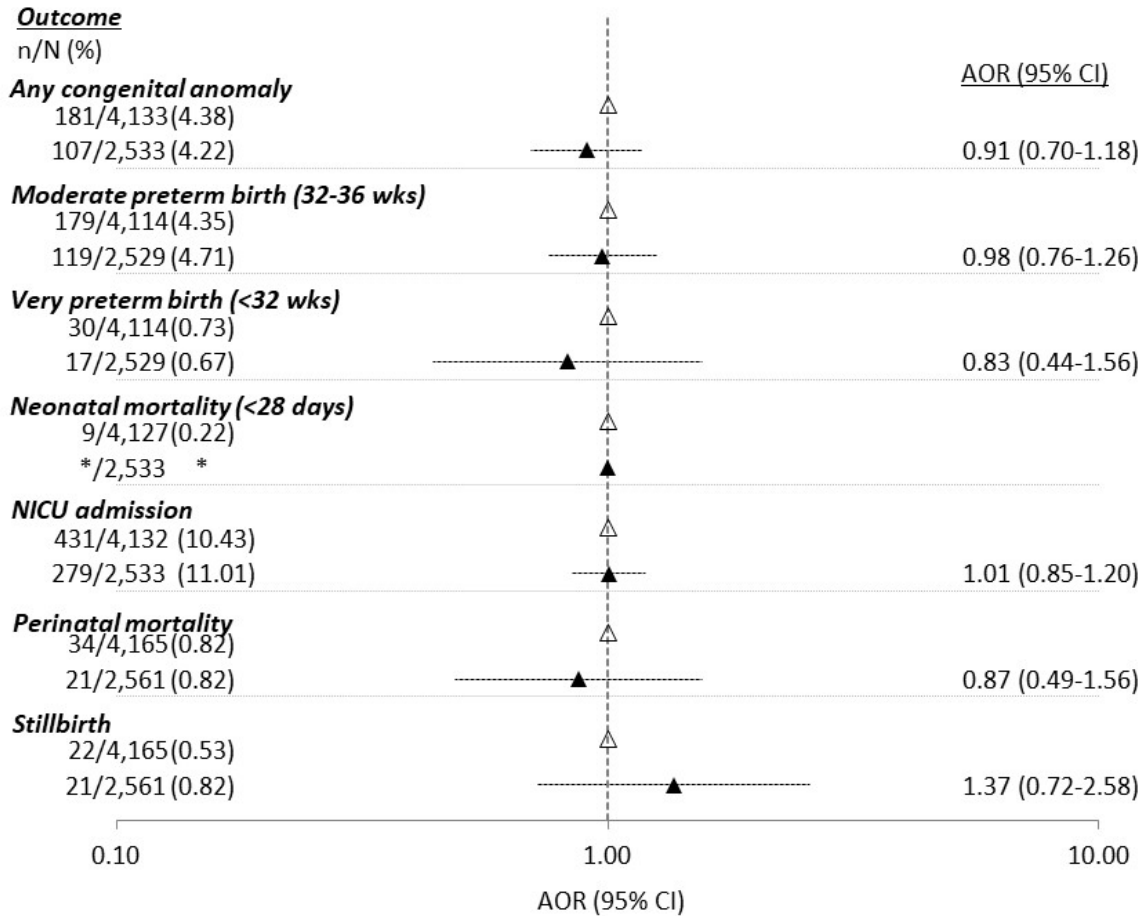

AOR – adjusted odds ratio; CI – confidence interval; NICU – neonatal intensive care unit

**Figure S5a: Adverse maternal outcomes comparing 2,527 births to Chinese refugee immigrants (▲ triangles) vs. 37,093 births to Chinese non-refugee immigrants (△ triangles). Odds ratios adjusted for maternal age, parity, income quintile, official language ability, education and duration of residence.**

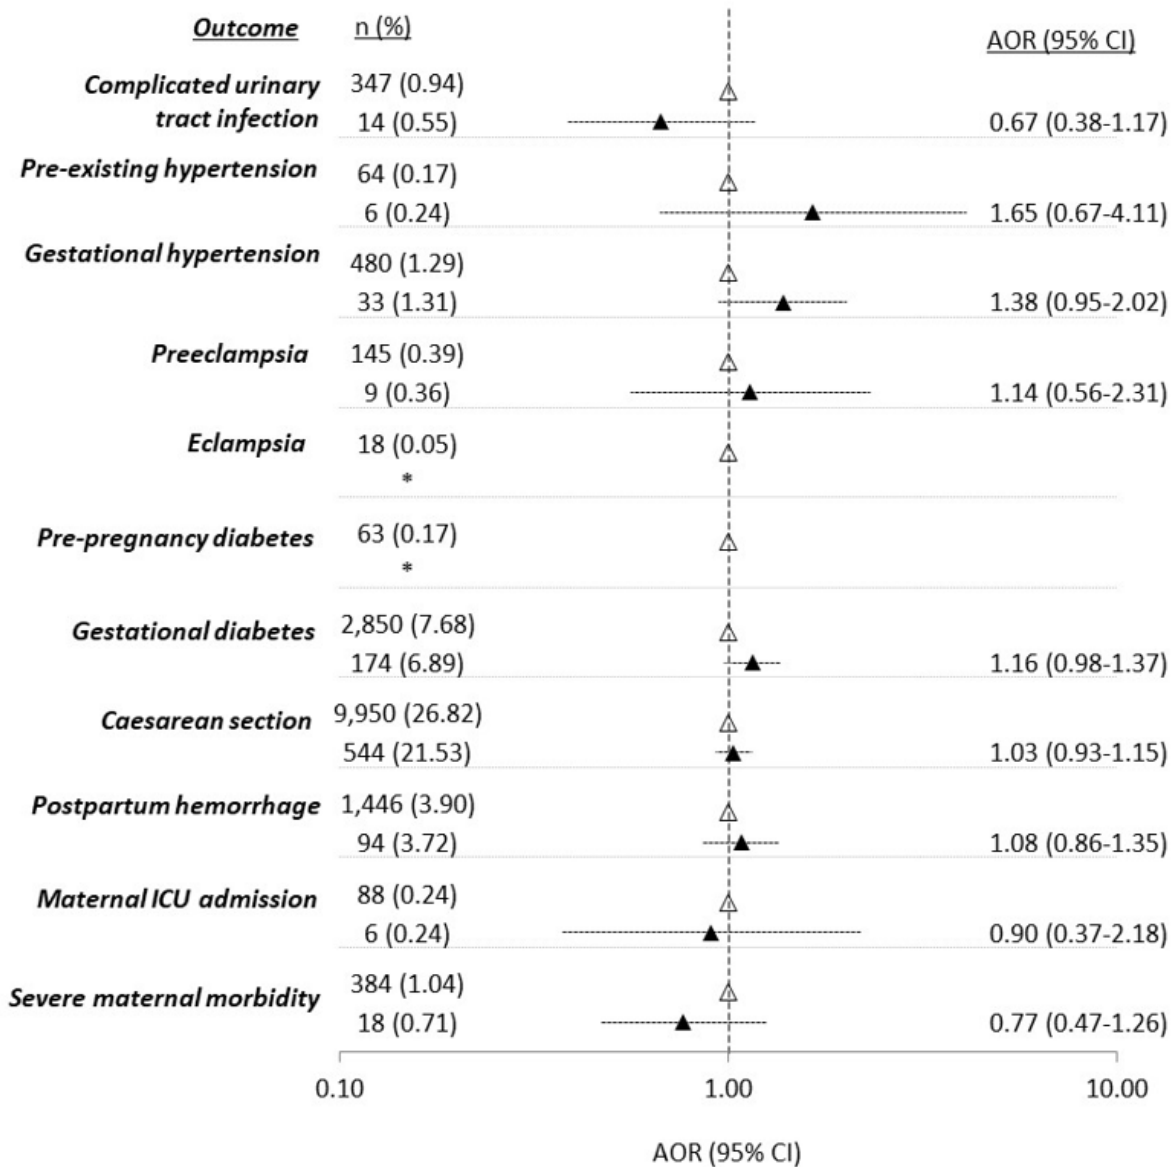

AOR – adjusted odds ratio; CI – confidence interval; ICU – intensive care unit; HIV – human immunodeficiency virus

**Figure S5b: Adverse perinatal outcomes comparing births to Chinese refugee immigrants (▲triangles) vs. births to Chinese non-refugee immigrants (△triangles). Odds ratios adjusted for maternal age, parity, income quintile, official language ability, education and duration of residence.**

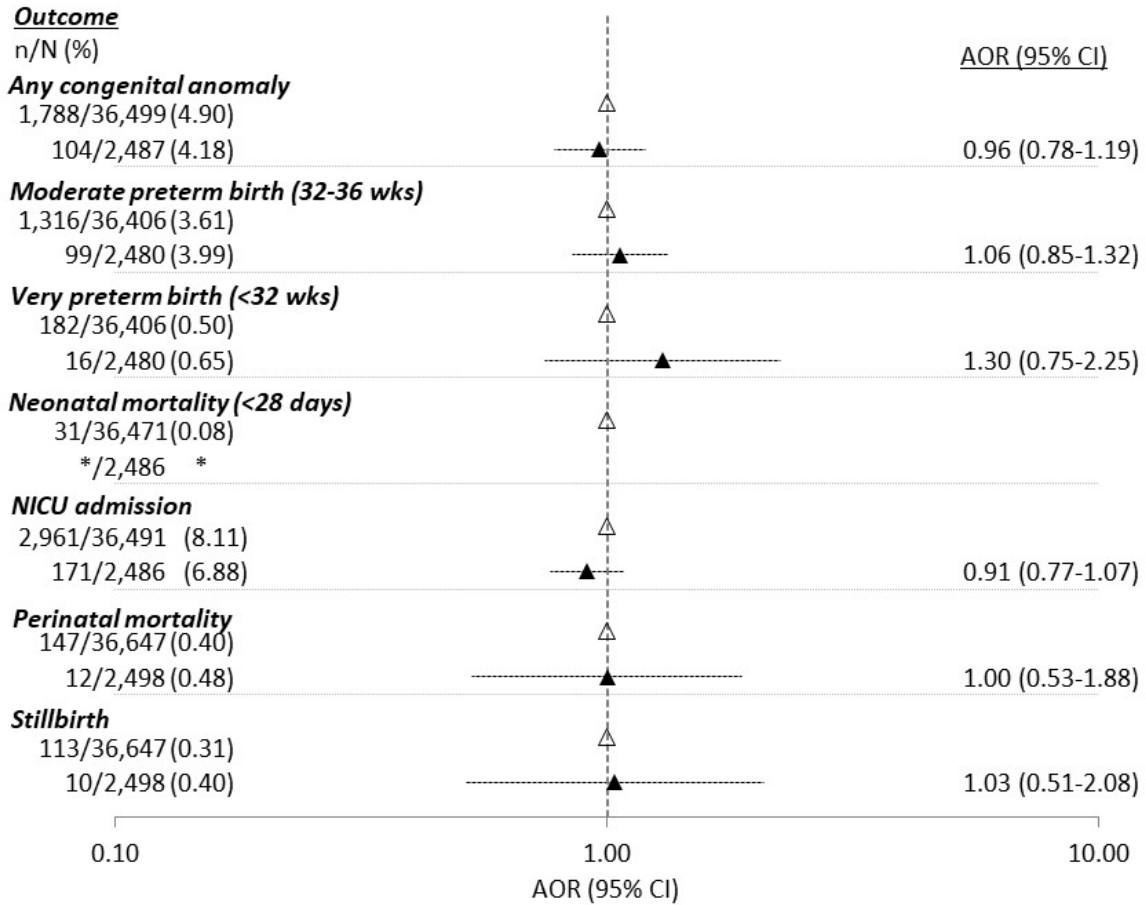

AOR – adjusted odds ratio; CI – confidence interval; NICU – neonatal intensive care unit

**Figure S6: Adverse maternal outcomes comparing 52,158 births to ALL refugee immigrants (■ squares) vs. 358,589 births to ALL non-refugee immigrants (□ squares), UNMATCHED. Odds ratios adjusted for maternal age, parity, income quintile, official language ability, education and duration of residence.**

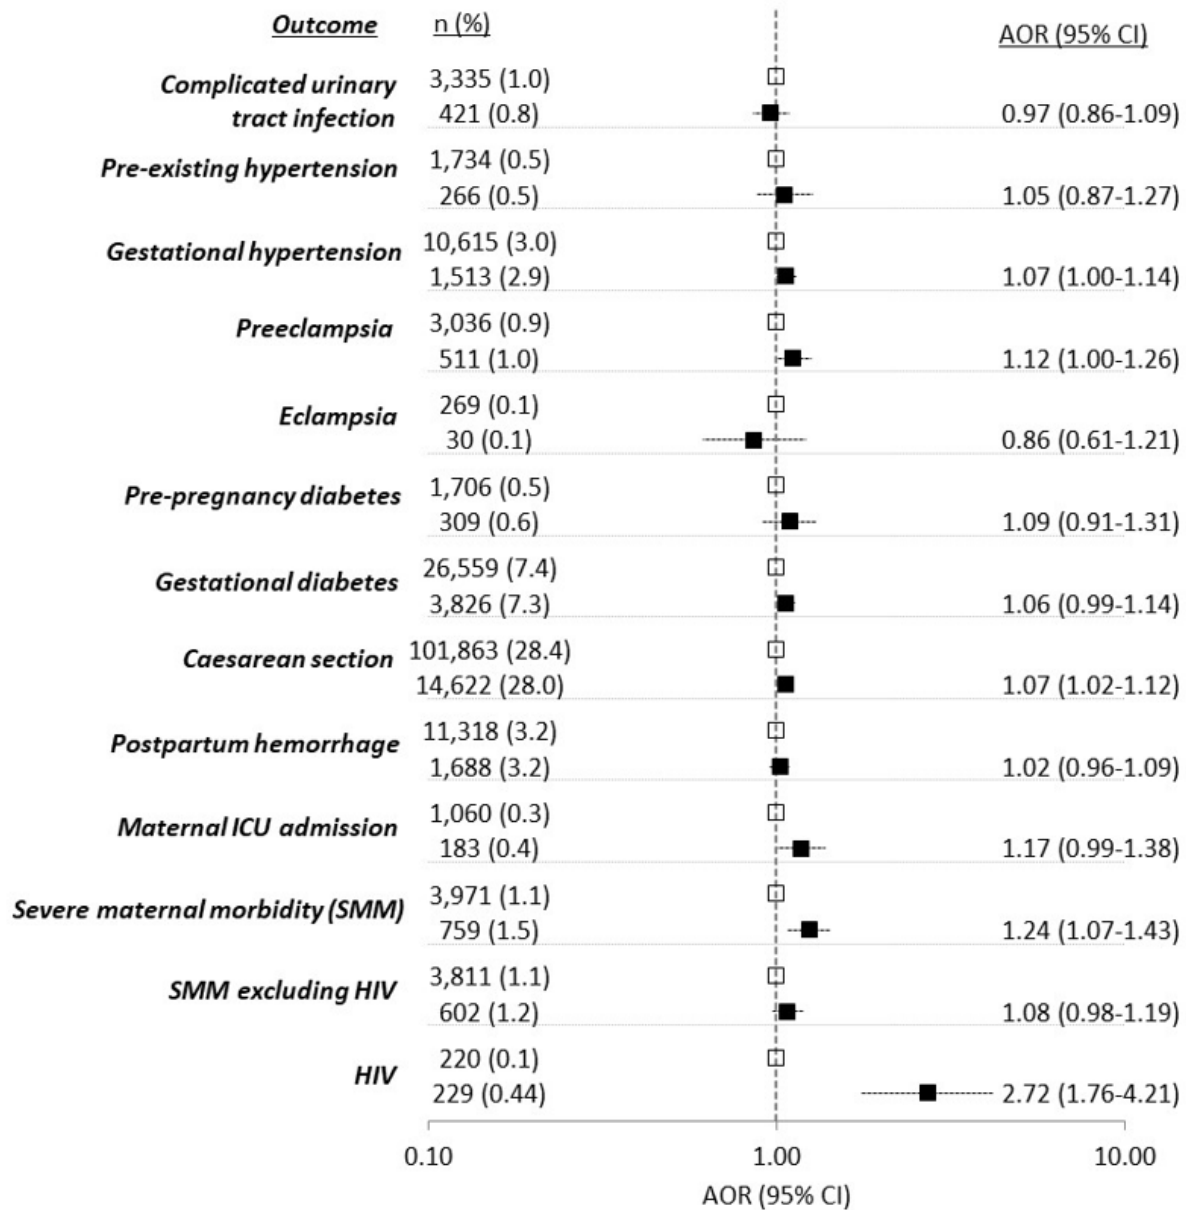

AOR – adjusted odds ratio; CI – confidence interval; ICU – intensive care unit; HIV – human immunodeficiency virus

**Figure S7: Adverse perinatal outcomes comparing births to ALL refugee immigrants (■ squares) vs. births to ALL non-refugee immigrants (□ squares), UNMATCHED. Odds ratios adjusted for maternal age, parity, income quintile, official language ability, education and duration of residence.**

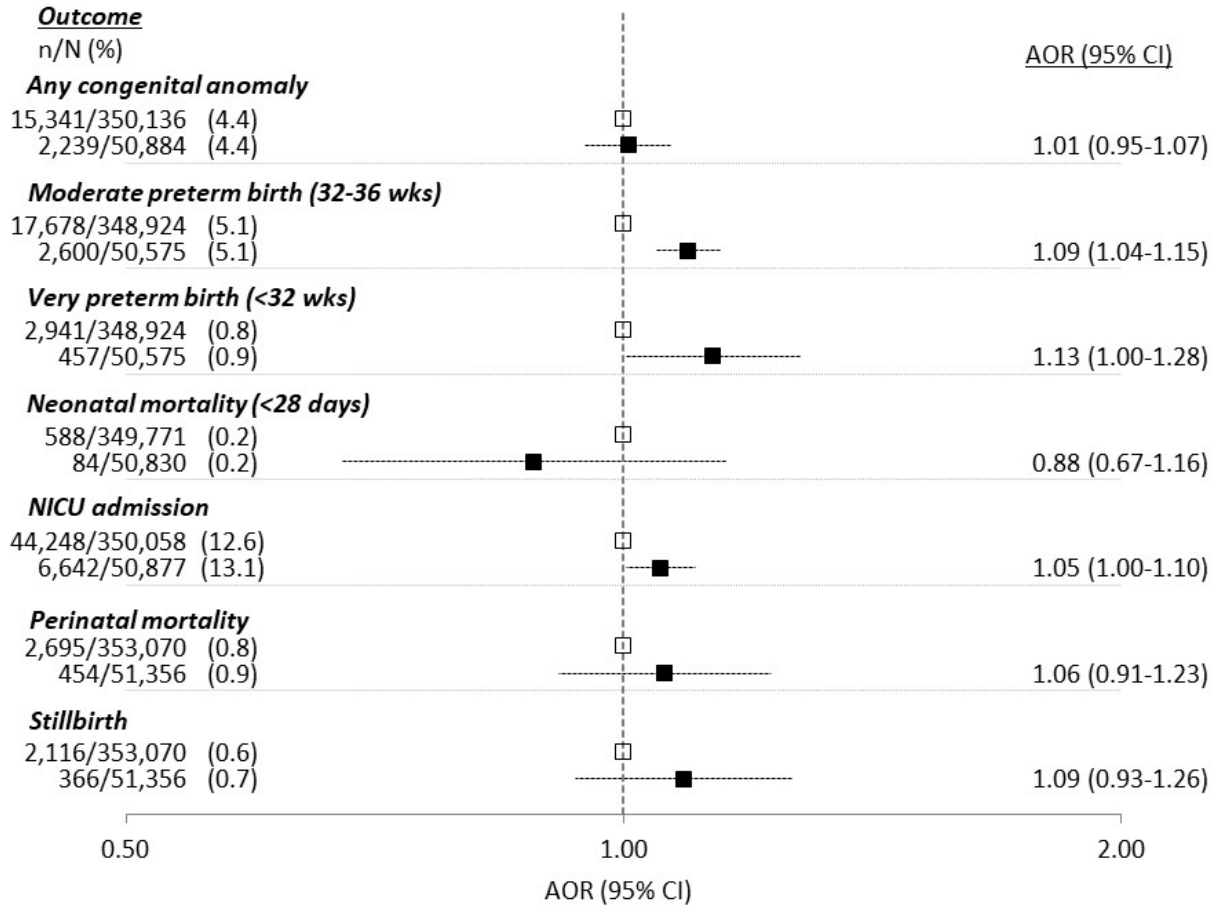

AOR – adjusted odds ratio; CI – confidence interval; NICU – neonatal intensive care unit
